# Supplementary material for: Gene expression profiling identifies distinct molecular subgroups of leiomyosarcoma with clinical relevance
Source: PubMed Central journal article supplement (PMC5061910; doi:10.1038/bjc.2016.280), 2016-09-08
Supplement: bjc2016280x1.pdf [file bjc2016280x1.pdf]

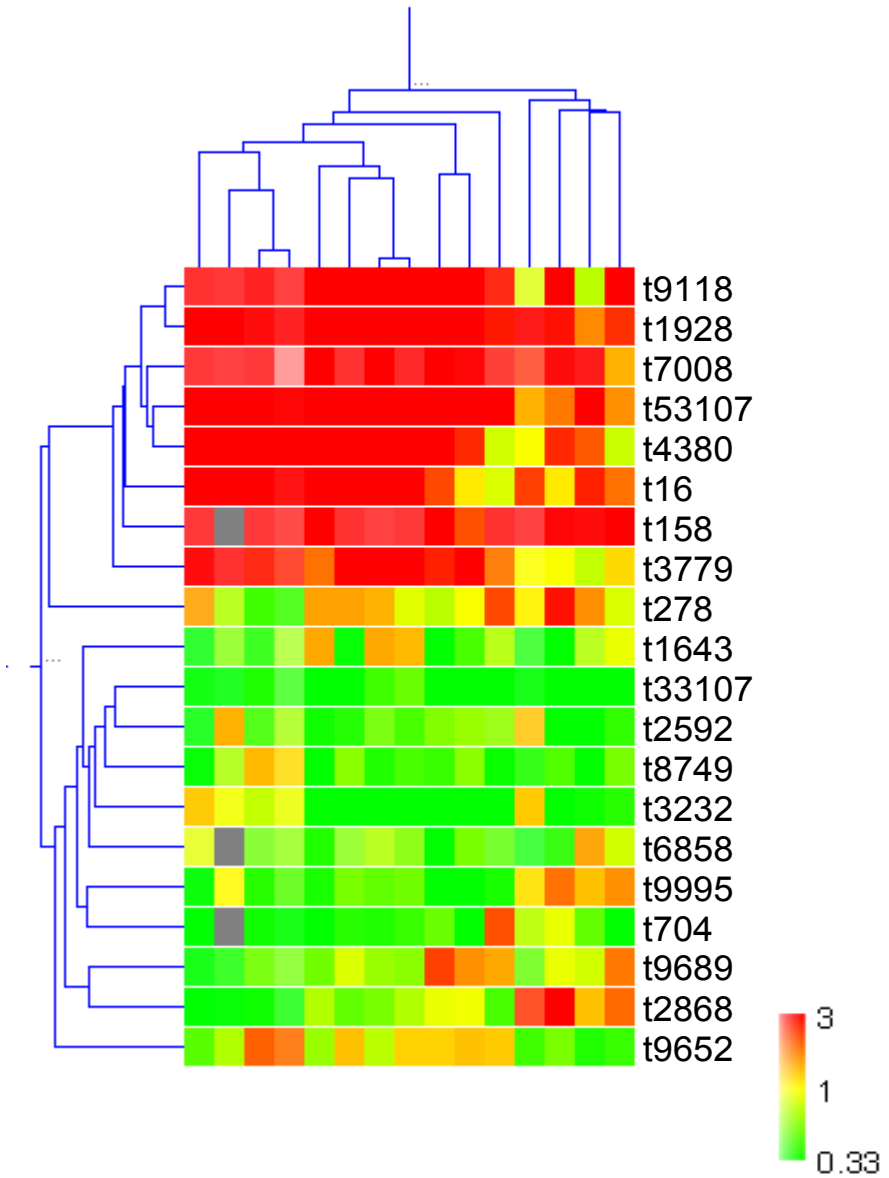

Supplementary Fig. S1 Hierarchical clustering analyses of leiomyosarcomas (vertical) and the refined group of 15 genes (horizontal). Each row corresponds to a tumour, and each column corresponds to a gene. Red indicates overexpression, while green indicates underexpression. Grey indicates missing or excluded data.
