# Supplementary material for: Gene expression profiling identifies distinct molecular subgroups of leiomyosarcoma with clinical relevance
Source: PubMed Central journal article supplement (PMC5061910; doi:10.1038/bjc.2016.280), 2016-09-08
Supplement: bjc2016280x2.pdf [file bjc2016280x2.pdf]

## **Description of supplementary data files**

**Supplementary Fig. S1** Hierarchical clustering analyses of leiomyosarcomas (vertical) and the refined group of 15 genes (horizontal).

**Supplementary Table S1** Array geneset information.

**Supplementary Table S2** Clinical data table.
