# Supplementary material for: Gene expression profiling identifies distinct molecular subgroups of leiomyosarcoma with clinical relevance
Source: PubMed Central journal article supplement (PMC5061910; doi:10.1038/bjc.2016.280), 2016-09-08
Supplement: bjc2016280x3.pdf [file bjc2016280x3.pdf]

Supplementary Table S1

Array geneset information

| CloneID | UniGene Cluster        | Symbol  | Name                                                                |
|---------|------------------------|---------|---------------------------------------------------------------------|
| 207618  | Hs.446641              | ARAF    | V-raf murine sarcoma 3611 viral oncogene homolog                    |
| 782513  | Hs.523847              | IFI6    | Interferon, alpha-inducible protein 6                               |
| 233581  | Hs.50308               | UBE2K   | Ubiquitin-conjugating enzyme E2K                                    |
| 62277   | Data not found         |         |                                                                     |
| 785845  | Hs.594250              | TFAM    | Transcription factor A, mitochondrial                               |
| 758222  | Hs.477                 | HSD17B3 | Hydroxysteroid (17-beta) dehydrogenase 3                            |
| 239877  | Hs.519632              | HDAC3   | Histone deacetylase 3                                               |
| 294487  | In multiple ClusterIDs |         |                                                                     |
| 712641  | Hs.279640              | TPR     | Translocated promoter region, nuclear basket protein                |
| 156386  | Hs.514038              | FLOT2   | Flotillin 2                                                         |
| 544639  | Hs.95612               | DSC2    | Desmocollin 2                                                       |
| 52629   | Hs.434875              | CAMK1   | Calcium/calmodulin-dependent protein kinase I                       |
| 796258  | Hs.463412              | SGCA    | Sarcoglycan, alpha (50kDa dystrophin-associated glycoprotein)       |
| 145681* | Hs.519075              | LMOD1   | Leiomodin 1 (smooth muscle)                                         |
| 563392  | Hs.591360              | CCDC6   | Coiled-coil domain containing 6                                     |
| 376206* | Hs.655519              | SYNPO2  | Synaptopodin 2                                                      |
| 122394  | Hs.73797               | GNA15   | Guanine nucleotide binding protein (G protein), alpha 15 (Gq class) |
| 868400  | Hs.79322               | QARS    | Glutaminyl-tRNA synthetase                                          |
| 288695  | Hs.129261              | SS18    | Synovial sarcoma translocation, chromosome 18                       |
| 490819  | Hs.151641              | LRRC32  | Leucine rich repeat containing 32                                   |
| 487071  | Hs.82963               | GNRH1   | Gonadotropin-releasing hormone 1 (luteinizing-releasing hormone)    |
| 856447  | Hs.14623               | IFI30   | Interferon, gamma-inducible protein 30                              |
| 840486  | Hs.440848              | VWF     | Von Willebrand factor                                               |
| 773305  | Hs.504352              | NTM     | Neurotrimin                                                         |
| 155575  | Hs.437422              | EPB41L1 | Erythrocyte membrane protein band 4.1-like 1                        |
| 740914  | Hs.208597              | CTBP1   | C-terminal binding protein 1                                        |
| 343646  | In multiple ClusterIDs |         |                                                                     |
| 297392  | Hs.374950              | MT1X    | Metallothionein 1X                                                  |
| 772111  | Hs.481819              | PDZD2   | PDZ domain containing 2                                             |

|         |                        |         |                                                                                          |
|---------|------------------------|---------|------------------------------------------------------------------------------------------|
| 789049  | In multiple ClusterIDs |         |                                                                                          |
| 322617  | Hs.469820              | RALB    | V-rac simian leukemia viral oncogene homolog B (ras related; GTP binding protein)        |
| 789069  | In multiple ClusterIDs |         |                                                                                          |
| 785963  | Hs.655407              | ZCCHC11 | Zinc finger, CCHC domain containing 11                                                   |
| 207358  | Hs.473721              | SLC2A1  | Solute carrier family 2 (facilitated glucose transporter), member 1                      |
| 796278  | Hs.355348              | GTF2H3  | General transcription factor IIH, polypeptide 3, 34kDa                                   |
| 971382  | Hs.292265              | ZMYND11 | Zinc finger, MYND-type containing 11                                                     |
| 725176  | Hs.520037              | NEU1    | Sialidase 1 (lysosomal sialidase)                                                        |
| 855586  | Hs.703520              |         | Transcribed locus                                                                        |
| 435036  | Hs.3416                | PLIN2   | Perilipin 2                                                                              |
| 502622  | Hs.387567              | ACLY    | ATP citrate lyase                                                                        |
| 364934  | Hs.380277              | DAPK1   | Death-associated protein kinase 1                                                        |
| 469306  | Hs.153444              | GRP     | Gastrin-releasing peptide                                                                |
| 725501  | Hs.654596              | ZBTB6   | Zinc finger and BTB domain containing 6                                                  |
| 878449  | Hs.335079              | MAP1B   | Microtubule-associated protein 1B                                                        |
| 490805  | Hs.643658              | NCOA4   | Nuclear receptor coactivator 4                                                           |
| 323238  | Hs.789                 | CXCL1   | Chemokine (C-X-C motif) ligand 1 (melanoma growth stimulating activity, alpha)           |
| 200018  | Hs.2484                | TCL1A   | T-cell leukemia/lymphoma 1A                                                              |
| 845663  | Hs.471818              | CAPRIN1 | Cell cycle associated protein 1                                                          |
| 361807  | Hs.517978              | GNAT1   | Guanine nucleotide binding protein (G protein), alpha transducing activity polypeptide 1 |
| 454908  | Hs.119689              | CGA     | Glycoprotein hormones, alpha polypeptide                                                 |
| 852913  | Hs.105465              | SNRPF   | Small nuclear ribonucleoprotein polypeptide F                                            |
| 429368  | Hs.89583               | TLX1    | T-cell leukemia homeobox 1                                                               |
| 811740  | Hs.482077              | ITGA2   | Integrin, alpha 2 (CD49B, alpha 2 subunit of VLA-2 receptor)                             |
| 1089539 | Hs.654380              | KRT14   | Keratin 14                                                                               |
| 594502  | Hs.244139              | FAS     | Fas (TNF receptor superfamily, member 6)                                                 |
| 759142  | Hs.470399              | ITGB6   | Integrin, beta 6                                                                         |
| 842884  | Hs.115474              | RFC3    | Replication factor C (activator 1) 3, 38kDa                                              |
| 1269337 | Hs.109731              | GLG1    | Golgi glycoprotein 1                                                                     |
| 625584  | Hs.517972              | TRAIP   | TRAF interacting protein                                                                 |
| 767055  | Hs.252451              | SEMA3A  | Sema domain, immunoglobulin domain (Ig), short basic                                     |

|         |                        |         |                                                                                           |
|---------|------------------------|---------|-------------------------------------------------------------------------------------------|
|         |                        |         | domain, secreted, (semaphorin) 3A                                                         |
| 843170  | Hs.73853               | BMP2    | Bone morphogenetic protein 2                                                              |
| 1472775 | Hs.654548              | COL8A1  | Collagen, type VIII, alpha 1                                                              |
| 646654  | Hs.191346              | Sep-07  | Septin 7                                                                                  |
| 769716  | Hs.187898              | NF2     | Neurofibromin 2 (merlin)                                                                  |
| 845363  | Hs.463456              | NME2    | NME/NM23 nucleoside diphosphate kinase 2                                                  |
| 1520872 | Hs.657729              | LRP2    | Low density lipoprotein receptor-related protein 2                                        |
| 665726  | In multiple ClusterIDs |         |                                                                                           |
| 772057  | In multiple ClusterIDs |         |                                                                                           |
| 868212  | Hs.369397              | TGFBI   | Transforming growth factor, beta-induced, 68kDa                                           |
| 1523210 | Hs.487360              | NOTCH2  | Notch 2                                                                                   |
| 725308  | Hs.1030                | RIN1    | Ras and Rab interactor 1                                                                  |
| 415388  | Hs.18573               | ACYP1   | Acylphosphatase 1, erythrocyte (common) type                                              |
| 743230  | Hs.523789              | NEAT1   | Nuclear paraspeckle assembly transcript 1 (non-protein coding)                            |
| 345833  | Hs.591731              | HNRNPAB | Heterogeneous nuclear ribonucleoprotein A/B                                               |
| 41406   | Hs.533336              | BAMBI   | BMP and activin membrane-bound inhibitor homolog ( <i>Xenopus laevis</i> )                |
| 82225   | Hs.213424              | SFRP1   | Secreted frizzled-related protein 1                                                       |
| 68605   | Hs.479808              | IGFBP7  | Insulin-like growth factor binding protein 7                                              |
| 625584  | Hs.517972              | TRAIP   | TRAF interacting protein                                                                  |
| 141731  | Hs.592095              | SLC16A5 | Solute carrier family 16, member 5 (monocarboxylic acid transporter 6)                    |
| 81475   | Hs.8546                | NOTCH3  | Notch 3                                                                                   |
| 624360  | Hs.180062              | PSMB8   | Proteasome (prosome, macropain) subunit, beta type, 8 (large multifunctional peptidase 7) |
| 838434  | Hs.72910               | CRYGC   | Crystallin, gamma C                                                                       |
| 590544  | In multiple ClusterIDs |         |                                                                                           |
| 755402  | Hs.265829              | ITGA3   | Integrin, alpha 3 (antigen CD49C, alpha 3 subunit of VLA-3 receptor)                      |
| 811015  | Hs.25647               | FOS     | FBJ murine osteosarcoma viral oncogene homolog                                            |
| 1057458 | Hs.485233              | MAPK14  | Mitogen-activated protein kinase 14                                                       |
| 592125  | Hs.519842              | RIPK1   | Receptor (TNFRSF)-interacting serine-threonine kinase 1                                   |
| 756465  | Hs.591033              | MMP19   | Matrix metalloproteinase 19                                                               |
| 207794  | Hs.75643               | NFE2    | Nuclear factor (erythroid-derived 2), 45kDa                                               |
| 293916  | Hs.597209              |         | Transcribed locus, strongly similar to XP_003892248.1                                     |

|        |                        |         |                                                                                                           |
|--------|------------------------|---------|-----------------------------------------------------------------------------------------------------------|
|        |                        |         | PREDICTED: glomulin-like [Papio anubis]                                                                   |
| 299679 | Hs.536913              |         | PA9=candidate tumor suppressor gene {3' region} [human, HEN endocervical cell line, mRNA Partial, 292 nt] |
| 144932 | Hs.433201              | CDK2AP1 | Cyclin-dependent kinase 2 associated protein 1                                                            |
| 245136 | Hs.16349               | ATMIN   | ATM interactor                                                                                            |
| 138991 | Hs.233240              | COL6A3  | Collagen, type VI, alpha 3                                                                                |
| 21899  | Hs.285197              | SRPK2   | SRSF protein kinase 2                                                                                     |
| 491544 | In multiple ClusterIDs |         |                                                                                                           |
| 40608  | Hs.388226              | HCRTR1  | Hypocretin (orexin) receptor 1                                                                            |
| 741831 | Hs.439312              | PLTP    | Phospholipid transfer protein                                                                             |
| 435858 | Hs.23262               | RNASE6  | Ribonuclease, RNase A family, k6                                                                          |
| 531957 | In multiple ClusterIDs |         |                                                                                                           |
| 85320  | Hs.295923              |         | Transcribed locus                                                                                         |
| 77244  | In multiple ClusterIDs |         |                                                                                                           |
| 744800 | Hs.19718               | PTPRU   | Protein tyrosine phosphatase, receptor type, U                                                            |
| 79592  | Hs.571886              | AKR7A2  | Aldo-keto reductase family 7, member A2 (aflatoxin aldehyde reductase)                                    |
| 49303  | Hs.655213              | PPP2R2B | Protein phosphatase 2, regulatory subunit B, beta                                                         |
| 609087 | Hs.349656              | SCARB2  | Scavenger receptor class B, member 2                                                                      |
| 244703 | Hs.696554              | ITGBL1  | Integrin, beta-like 1 (with EGF-like repeat domains)                                                      |
| 207288 | Hs.520819              | INSIG1  | Insulin induced gene 1                                                                                    |
| 283301 | Hs.97270               | FAM13A  | Family with sequence similarity 13, member A                                                              |
| 139573 | In multiple ClusterIDs |         |                                                                                                           |
| 166004 | Hs.466766              | LTBP4   | Latent transforming growth factor beta binding protein 4                                                  |
| 47475  | Hs.519702              | CYFIP2  | Cytoplasmic FMR1 interacting protein 2                                                                    |
| 43207  | Hs.441202              |         | GFRA2                                                                                                     |
| 243580 | Hs.220864              | CHD2    | Chromodomain helicase DNA binding protein 2                                                               |
| 770192 | Hs.81337               | LGALS9  | Lectin, galactoside-binding, soluble, 9                                                                   |
| 243358 | Hs.46700               | ING1    | Inhibitor of growth family, member 1                                                                      |
| 755416 | Hs.167700              | SMAD5   | SMAD family member 5                                                                                      |
| 130820 | Hs.443881              | PAXIP1  | PAX interacting (with transcription-activation domain) protein 1                                          |
| 129865 | Hs.250822              | AURKA   | Aurora kinase A                                                                                           |
| 33478  | Hs.335084              | FPGS    | Folylpolyglutamate synthase                                                                               |

|         |                        |          |                                                                                                                                                     |
|---------|------------------------|----------|-----------------------------------------------------------------------------------------------------------------------------------------------------|
| 347373  | In multiple ClusterIDs |          |                                                                                                                                                     |
| 340558  | Hs.518609              | ARPC5    | Actin related protein 2/3 complex, subunit 5, 16kDa                                                                                                 |
| 206994  | Hs.478125              | INADL    | InaD-like (Drosophila)                                                                                                                              |
| 770910  | Hs.603657              | ELF3     | E74-like factor 3 (ets domain transcription factor, epithelial-specific )                                                                           |
| 824081  | Hs.490765              | KCNN3    | Potassium intermediate/small conductance calcium-activated channel, subfamily N, member 3                                                           |
| 725076  | Hs.97439               | NT5C2    | 5'-nucleotidase, cytosolic II                                                                                                                       |
| 511303  | Hs.410477              | PLA2R1   | Phospholipase A2 receptor 1, 180kDa                                                                                                                 |
| 222107  | Hs.479756              | KDR      | Kinase insert domain receptor (a type III receptor tyrosine kinase)                                                                                 |
| 825648  | Hs.81221               | IGHV5-78 | Immunoglobulin heavy variable 5-78 (pseudogene)                                                                                                     |
| 1472643 | Hs.370504              | RPS15A   | Ribosomal protein S15a                                                                                                                              |
| 681997  | Hs.591167              | DLX4     | Distal-less homeobox 4                                                                                                                              |
| 754736  | Hs.436873              | ITGAV    | Integrin, alpha V                                                                                                                                   |
| 430614  | Hs.198365              | BPGM     | 2,3-bisphosphoglycerate mutase                                                                                                                      |
| 896949  | Hs.643495              |          | Transcribed locus                                                                                                                                   |
| 1358393 | Hs.514012              | MAP2K3   | Mitogen-activated protein kinase kinase 3                                                                                                           |
| 2465945 | Hs.446376              | APC2     | Adenomatosis polyposis coli 2                                                                                                                       |
| 502177* | Hs.460109              | MYH11    | Myosin, heavy chain 11, smooth muscle                                                                                                               |
| 810272* | Hs.444403              | PPP1R12B | Protein phosphatase 1, regulatory subunit 12B                                                                                                       |
| 588829* | Hs.315137              | AARS     | Alanyl-tRNA synthetase                                                                                                                              |
| 28218*  | Hs.7195                | GABRG2   | Gamma-aminobutyric acid (GABA) A receptor, gamma 2                                                                                                  |
| 241489  | In multiple ClusterIDs |          |                                                                                                                                                     |
| 856650  | Hs.418668              | ATP5D    | ATP synthase, H <sup>+</sup> transporting, mitochondrial F1 complex, delta subunit                                                                  |
| 856535  | Hs.652308              | MTHFD1   | Methylenetetrahydrofolate dehydrogenase (NADP <sup>+</sup> dependent) 1, methenyltetrahydrofolate cyclohydrolase, formyltetrahydrofolate synthetase |
| 432210  | Hs.2246                | CPN1     | Carboxypeptidase N, polypeptide 1                                                                                                                   |
| 377252  | Hs.167046              | ADORA2B  | Adenosine A2b receptor                                                                                                                              |
| 809876  | Hs.524464              | ATP5G2   | ATP synthase, H <sup>+</sup> transporting, mitochondrial Fo complex, subunit C2 (subunit 9)                                                         |
| 814780  | Hs.591269              | CAMK4    | Calcium/calmodulin-dependent protein kinase IV                                                                                                      |
| 505881  | Hs.654536              | ADA      | Adenosine deaminase                                                                                                                                 |

|         |                        |         |                                                                                           |
|---------|------------------------|---------|-------------------------------------------------------------------------------------------|
| 502055  | Hs.149103              | ARSB    | Arylsulfatase B                                                                           |
| 300367  | Hs.41565               | MSTN    | Myostatin                                                                                 |
| 586650  | Hs.25450               | SLC29A1 | Solute carrier family 29 (nucleoside transporters), member 1                              |
| 857681  | Hs.547172              | MAMDC2  | MAM domain containing 2                                                                   |
| 588911  | Hs.524760              | OAS1    | 2'-5'-oligoadenylate synthetase 1, 40/46kDa                                               |
| 2066371 | Hs.260074              | CYP19A1 | Cytochrome P450, family 19, subfamily A, polypeptide 1                                    |
| 704690  | Hs.201918              | HIPK3   | Homeodomain interacting protein kinase 3                                                  |
| 858293  | Hs.74405               | YWHAQ   | Tyrosine 3-monooxygenase/tryptophan 5-monooxygenase activation protein, theta polypeptide |
| 246748  | Hs.159494              | BTK     | Bruton agammaglobulinemia tyrosine kinase                                                 |
| 2147728 | Hs.150749              | BCL2    | B-cell CLL/lymphoma 2                                                                     |
| 789314  | Hs.1799                | CD1D    | CD1d molecule                                                                             |
| 741977  | Hs.69771               | CFB     | Complement factor B                                                                       |
| 307069  | Hs.523841              | ALDH3B1 | Aldehyde dehydrogenase 3 family, member B1                                                |
| 28510   | Hs.519220              | CNTN2   | Contactin 2 (axonal)                                                                      |
| 229901  | Hs.75262               | CTSO    | Cathepsin O                                                                               |
| 755923  | Hs.31210               | BCL3    | B-cell CLL/lymphoma 3                                                                     |
| 856519  | Hs.499886              | ALDH3A2 | Aldehyde dehydrogenase 3 family, member A2                                                |
| 841179  | Hs.632368              | EXOSC10 | Exosome component 10                                                                      |
| 949971  | Hs.496487              | ATF4    | Activating transcription factor 4 (tax-responsive enhancer element B67)                   |
| 342181  | Hs.150749              | BCL2    | B-cell CLL/lymphoma 2                                                                     |
| 208542  | Hs.1219                | ADH4    | Alcohol dehydrogenase 4 (class II), pi polypeptide                                        |
| 825170  | Hs.477155              | ATP6V1A | ATPase, H <sup>+</sup> transporting, lysosomal 70kDa, V1 subunit A                        |
| 789383  | Hs.200250              | CREM    | CAMP responsive element modulator                                                         |
| 206795  | In multiple ClusterIDs |         |                                                                                           |
| 266312  | Hs.492280              | ATP7B   | ATPase, Cu <sup>++</sup> transporting, beta polypeptide                                   |
| 486113  | In multiple ClusterIDs |         |                                                                                           |
| 448193  | Hs.632446              | ARNT    | Aryl hydrocarbon receptor nuclear translocator                                            |
| 1011317 | Hs.194669              | EZH1    | Enhancer of zeste homolog 1 (Drosophila)                                                  |
| 344489  | Hs.203952              | TRRAP   | Transformation/transcription domain-associated protein                                    |
| 1711262 | Hs.9333                | PDE8A   | Phosphodiesterase 8A                                                                      |
| 800137  | Hs.155644              | PAX2    | Paired box 2                                                                              |
| 2090446 | Hs.655467              | POLH    | Polymerase (DNA directed), eta                                                            |

|         |                |           |                                                                                               |
|---------|----------------|-----------|-----------------------------------------------------------------------------------------------|
| 2535214 | Hs.518513      | TNK2      | Tyrosine kinase, non-receptor, 2                                                              |
| 1467706 | Hs.643130      | PAWR      | PRKC, apoptosis, WT1, regulator                                                               |
| 2578771 | Hs.713764      | ACTG1     | Actin, gamma 1                                                                                |
| 712162  | Hs.146806      | CUL1      | Cullin 1                                                                                      |
| 953543  | Hs.654616      | CASP6     | Caspase 6, apoptosis-related cysteine peptidase                                               |
| 1873594 | Hs.267659      | VAV3      | Vav 3 guanine nucleotide exchange factor                                                      |
| 179667  | Data not found |           |                                                                                               |
| 1113071 | Hs.235935      | NOV       | Nephroblastoma overexpressed                                                                  |
| 2357094 | Hs.291363      | CHEK2     | Checkpoint kinase 2                                                                           |
| 298625  | Hs.380271      | OGG1      | 8-oxoguanine DNA glycosylase                                                                  |
| 2518510 | Hs.517517      | EP300     | E1A binding protein p300                                                                      |
| 2089793 | Hs.709201      | FGD1      | FYVE, RhoGEF and PH domain containing 1                                                       |
| 2005569 | Hs.481022      | SFRP2     | Secreted frizzled-related protein 2                                                           |
| 345103  | Hs.523329      | EPHB2     | EPH receptor B2                                                                               |
| 129988  | Hs.89538       | CETP      | Cholesteryl ester transfer protein, plasma                                                    |
| 796388  | Hs.444329      | GPC6      | Glypican 6                                                                                    |
| 1456160 | Hs.546239      | AZGP1     | Alpha-2-glycoprotein 1, zinc-binding                                                          |
| 328745  | Hs.368626      | RTN1      | Reticulon 1                                                                                   |
| 809998  | Hs.655232      |           | AMY1C                                                                                         |
| 1410444 | Hs.270833      | AREG      | Amphiregulin                                                                                  |
| 1493527 | Hs.489207      | ASNS      | Asparagine synthetase (glutamine-hydrolyzing)                                                 |
| 47481   | Hs.85201       | CLEC2B    | C-type lectin domain family 2, member B                                                       |
| 815575  | Hs.153961      | ACTR1A    | ARP1 actin-related protein 1 homolog A, centractin alpha (yeast)                              |
| 1469230 | Hs.743989      | COX8A     | Cytochrome c oxidase subunit VIIIA (ubiquitous)                                               |
| 1493383 | Hs.618145      | CIRBP     | Cold inducible RNA binding protein                                                            |
| 1950962 | Hs.82071       | CITED2    | Cbp/p300-interacting transactivator, with Glu/Asp-rich carboxy-terminal domain, 2             |
| 1406602 | Hs.655801      | TNFRSF10C | Tumor necrosis factor receptor superfamily, member 10c, decoy without an intracellular domain |
| 842884  | Hs.115474      | RFC3      | Replication factor C (activator 1) 3, 38kDa                                                   |
| 2089619 | Hs.19192       | CDK2      | Cyclin-dependent kinase 2                                                                     |
| 1582627 | Hs.459211      | AKAP13    | A kinase (PRKA) anchor protein 13                                                             |
| 325224  | Hs.653163      | TAF9      | TAF9 RNA polymerase II, TATA box binding protein (TBP)-associated factor, 32kDa               |
| 230218  | Hs.94672       | BLOC1S1   | Biogenesis of lysosomal organelles complex-1, subunit 1                                       |

|         |                        |         |                                                          |
|---------|------------------------|---------|----------------------------------------------------------|
| 236355  | In multiple ClusterIDs |         |                                                          |
| 300237  | In multiple ClusterIDs |         |                                                          |
| 276449  | Hs.255230              | GUSB    | Glucuronidase, beta                                      |
| 214068  | Hs.524134              | GATA3   | GATA binding protein 3                                   |
| 306901  | In multiple ClusterIDs |         |                                                          |
| 564756  | Hs.587054              | G3BP1   | GTPase activating protein (SH3 domain) binding protein 1 |
| 42864   | Hs.369089              | COL4A5  | Collagen, type IV, alpha 5                               |
| 812033  | Hs.328232              | GPC1    | Glypican 1                                               |
| 1323157 | Hs.362324              | ZNF345  | Zinc finger protein 345                                  |
| 488207  | Hs.468675              | PDPN    | Podoplanin                                               |
| 41074   | Hs.10734               | CHRNA4  | Cholinergic receptor, nicotinic, alpha 4 (neuronal)      |
| 767495  | Hs.21509               | GLI3    | GLI family zinc finger 3                                 |
| 1476181 | Hs.122511              | CETN1   | Centrin, EF-hand protein, 1                              |
| 769926  | Hs.93659               | PDIA4   | Protein disulfide isomerase family A, member 4           |
| 782406  | Hs.498313              | ADSS    | Adenylosuccinate synthase                                |
| 823574  | In multiple ClusterIDs |         |                                                          |
| 1323539 | Hs.327179              | SLC17A3 | Solute carrier family 17 (sodium phosphate), member 3    |
| 160656  | Hs.625725              | BCAM    | Basal cell adhesion molecule (Lutheran blood group)      |
| 245920  | Hs.82614               | GYS2    | Glycogen synthase 2 (liver)                              |
| 756480  | Hs.532790              | NMT1    | N-myristoyltransferase 1                                 |
| 139009  | Hs.203717              | FN1     | Fibronectin 1                                            |
| 755037  | In multiple ClusterIDs |         |                                                          |
| 248261  | Hs.584238              | GLDC    | Glycine dehydrogenase (decarboxylating)                  |
| 768443  | Hs.389700              | MGST1   | Microsomal glutathione S-transferase 1                   |
| 752631  | Hs.732357              |         | Transcribed locus                                        |
| 33690   | Hs.369606              | CPSF6   | Cleavage and polyadenylation specific factor 6, 68kDa    |
| 811792  | Hs.82327               | GSS     | Glutathione synthetase                                   |
| 52228   | Hs.519693              |         | GRIA1                                                    |
| 360478  | Hs.483635              | FGF1    | Fibroblast growth factor 1 (acidic)                      |
| 509760  | In multiple ClusterIDs |         |                                                          |
| 713922  | Hs.279837              | GSTM2   | Glutathione S-transferase mu 2 (muscle)                  |
| 173228  | Hs.151413              | GMFB    | Glia maturation factor, beta                             |



|         |                        |           |                                                                                               |
|---------|------------------------|-----------|-----------------------------------------------------------------------------------------------|
| 767851  | Hs.591133              | FBN1      | Fibrillin 1                                                                                   |
| 768299  | Hs.712948              | ZNF652    | Zinc finger protein 652                                                                       |
| 361639  | Hs.315562              | GCLM      | Glutamate-cysteine ligase, modifier subunit                                                   |
| 950445  | Hs.105818              | PPP2CA    | Protein phosphatase 2, catalytic subunit, alpha isozyme                                       |
| 951233  | Hs.82793               | PSMB3     | Proteasome (prosome, macropain) subunit, beta type, 3                                         |
| 627542  | Hs.488143              | BLVRA     | Biliverdin reductase A                                                                        |
| 236305  | In multiple ClusterIDs |           |                                                                                               |
| 128302  | Hs.504613              | PTMS      | Parathyrosin                                                                                  |
| 781050  | Hs.655327              | PFDN5     | Prefoldin subunit 5                                                                           |
| 203132  | Hs.478275              | TNFSF10   | Tumor necrosis factor (ligand) superfamily, member 10                                         |
| 208413  | Hs.182385              | HPN       | Hepsin                                                                                        |
| 135083  | Hs.591095              | PDIA3     | Protein disulfide isomerase family A, member 3                                                |
| 83363   | Hs.279257              | PCMT1     | Protein-L-isoaspartate (D-aspartate) O-methyltransferase                                      |
| 235155  | Hs.433300              | FCER1G    | Fc fragment of IgE, high affinity I, receptor for; gamma polypeptide                          |
| 785293  | Hs.502775              | PLA2G16   | Phospholipase A2, group XVI                                                                   |
| 212621* | Hs.500483              | ACTA2     | Actin, alpha 2, smooth muscle, aorta                                                          |
| 68828   | Hs.414795              | SERPINE1  | Serpin peptidase inhibitor, clade E (nexin, plasminogen activator inhibitor type 1), member 1 |
| 264566* | Hs.476432              |           | SLMAP                                                                                         |
| 166245  | Hs.558334              | GRIN1     | Glutamate receptor, ionotropic, N-methyl D-aspartate 1                                        |
| 307660  | Hs.391561              | FABP4     | Fatty acid binding protein 4, adipocyte                                                       |
| 450307  | Hs.75841               | ERP29     | Endoplasmic reticulum protein 29                                                              |
| 290724  | Hs.130838              | MICA      | MHC class I polypeptide-related sequence A                                                    |
| 33643   | Data not found         |           |                                                                                               |
| 530359  | Hs.370312              | FNTA      | Farnesyltransferase, CAAX box, alpha                                                          |
| 278808  | Hs.502511              | SPI1      | Spleen focus forming virus (SFFV) proviral integration oncogene spi1                          |
| 154093  | Hs.632531              | CIR1      | Corepressor interacting with RBPJ, 1                                                          |
| 595009  | Hs.643553              | LINC00667 | Long intergenic non-protein coding RNA 667                                                    |
| 502369  | Hs.443831              | PDCD5     | Programmed cell death 5                                                                       |
| 712840  | Hs.595276              | STAT5B    | Signal transducer and activator of transcription 5B                                           |
| 66718   | Hs.226307              |           | APOBEC3B                                                                                      |
| 46916   | Hs.546267              | MMP16     | Matrix metalloproteinase 16 (membrane-inserted)                                               |
| 859359  | Hs.50649               | TP53I3    | Tumor protein p53 inducible protein 3                                                         |
| 897596  | Hs.532359              |           | RPL5                                                                                          |

|         |                        |          |                                                                      |
|---------|------------------------|----------|----------------------------------------------------------------------|
| 85840   | Hs.503911              | NNMT     | Nicotinamide N-methyltransferase                                     |
| 358531  | In multiple ClusterIDs |          |                                                                      |
| 275180  | In multiple ClusterIDs |          |                                                                      |
| 49351   | Hs.632839              | PLXNA3   | Plexin A3                                                            |
| 756687  | Hs.731377              | SCARB1   | Scavenger receptor class B, member 1                                 |
| 743077  | Hs.98008               | GK2      | Glycerol kinase 2                                                    |
| 724932  | Hs.235116              | GRK6     | G protein-coupled receptor kinase 6                                  |
| 291965  | Hs.128067              | WIPF1    | WAS/WASL interacting protein family, member 1                        |
| 741885  | In multiple ClusterIDs |          |                                                                      |
| 263014  | Hs.268573              | GSTT1    | Glutathione S-transferase theta 1                                    |
| 433253  | Hs.494496              | FBP1     | Fructose-1,6-bisphosphatase 1                                        |
| 51826   | Hs.482043              | NNT      | Nicotinamide nucleotide transhydrogenase                             |
| 179776  | Hs.89864               |          | SKIV2L                                                               |
| 256907  | Hs.102484              | GSTA3    | Glutathione S-transferase alpha 3                                    |
| 502367  | Hs.24601               | FBLN1    | Fibulin 1                                                            |
| 855890  | Hs.350265              | LONP1    | Lon peptidase 1, mitochondrial                                       |
| 291478  | Hs.170019              | RUNX3    | Runt-related transcription factor 3                                  |
| 489839  | Hs.435765              | ENPEP    | Glutamyl aminopeptidase (aminopeptidase A)                           |
| 855755  | Hs.299002              | FBL      | Fibrillarlin                                                         |
| 365883  | Hs.413482              | C21orf33 | Chromosome 21 open reading frame 33                                  |
| 773290  | Hs.662503              |          | Transcribed locus                                                    |
| 899976  | Hs.405958              | CDC6     | Cell division cycle 6                                                |
| 1579639 | Hs.856                 | IFNG     | Interferon, gamma                                                    |
| 712899  | Hs.473163              | BMP7     | Bone morphogenetic protein 7                                         |
| 785802  | Hs.481022              | SFRP2    | Secreted frizzled-related protein 2                                  |
| 978715  | Hs.524390              | TUBA1B   | Tubulin, alpha 1b                                                    |
| 1589786 | Hs.111                 | FGF9     | Fibroblast growth factor 9 (glia-activating factor)                  |
| 740302  | Hs.490415              | ZYX      | Zyxin                                                                |
| 796096  | Hs.461925              | RPA1     | Replication protein A1, 70kDa                                        |
| 1011586 | Hs.440955              | ITGA4    | Integrin, alpha 4 (antigen CD49D, alpha 4 subunit of VLA-4 receptor) |
| 1616363 | Hs.503878              | NCAM1    | Neural cell adhesion molecule 1                                      |
| 742936  | In multiple ClusterIDs |          |                                                                      |

|         |                        |         |                                                                                                        |
|---------|------------------------|---------|--------------------------------------------------------------------------------------------------------|
| 796989  | Hs.733399              |         | Transcribed locus, strongly similar to NP_000957.1 RARG gene product [Homo sapiens]                    |
| 1031744 | Hs.492407              | YWHAZ   | Tyrosine 3-monooxygenase/tryptophan 5-monooxygenase activation protein, zeta polypeptide               |
| 1627984 | Hs.269408              | E2F3    | E2F transcription factor 3                                                                             |
| 754034  | Hs.1166                | THPO    | Thrombopoietin                                                                                         |
| 809526  | Hs.32981               | SEMA3F  | Sema domain, immunoglobulin domain (Ig), short basic domain, secreted, (semaphorin) 3F                 |
| 1034293 | Hs.1274                | BMP1    | Bone morphogenetic protein 1                                                                           |
| 1631867 | Hs.388739              | XRCC5   | X-ray repair complementing defective repair in Chinese hamster cells 5 (double-strand-break rejoining) |
| 285460  | Hs.390171              | COL11A2 | Collagen, type XI, alpha 2                                                                             |
| 796134  | Hs.594838              | MAP3K7  | Mitogen-activated protein kinase kinase kinase 7                                                       |
| 594517  | In multiple ClusterIDs |         |                                                                                                        |
| 755581  | In multiple ClusterIDs |         |                                                                                                        |
| 204686  | Hs.442498              | FXYP1   | FXYP domain containing ion transport regulator 1                                                       |
| 67759   | Hs.507658              | ALOX5AP | Arachidonate 5-lipoxygenase-activating protein                                                         |
| 877835  | Hs.182825              | RPL35   | Ribosomal protein L35                                                                                  |
| 611075  | Hs.67397               | HOXA1   | Homeobox A1                                                                                            |
| 769537  | Hs.196176              | ECH1    | Enoyl CoA hydratase 1, peroxisomal                                                                     |
| 86160   | In multiple ClusterIDs |         |                                                                                                        |
| 511091  | Hs.646318              |         | ANKRD36C                                                                                               |
| 302632  | Hs.155586              | LRRC23  | Leucine rich repeat containing 23                                                                      |
| 666121  | Hs.517228              | TIAM1   | T-cell lymphoma invasion and metastasis 1                                                              |
| 774100  | Hs.522818              | L1CAM   | L1 cell adhesion molecule                                                                              |
| 877827  | Hs.311640              | RPS27A  | Ribosomal protein S27a                                                                                 |
| 1555706 | Hs.514174              | JUP     | Junction plakoglobin                                                                                   |
| 685926  | Data not found         |         |                                                                                                        |
| 784589  | Hs.80343               | MMP15   | Matrix metalloproteinase 15 (membrane-inserted)                                                        |
| 127193  | Hs.407482              | MFSD2B  | Major facilitator superfamily domain containing 2B                                                     |
| 150623  | Hs.137510              |         | NCOR2                                                                                                  |
| 357344  | Hs.95162               | KCNQ1   | Potassium voltage-gated channel, KQT-like subfamily, member 1                                          |
| 137836  | Hs.478150              | PDCD10  | Programmed cell death 10                                                                               |
| 359982  | Data not found         |         |                                                                                                        |

|        |                        |        |                                                                                              |
|--------|------------------------|--------|----------------------------------------------------------------------------------------------|
| 767828 | Hs.404568              | HPS1   | Hermansky-Pudlak syndrome 1                                                                  |
| 46938  | In multiple ClusterIDs |        |                                                                                              |
| 23514  | Hs.731575              |        | TAS2R14                                                                                      |
| 770704 | In multiple ClusterIDs |        |                                                                                              |
| 298303 | Hs.310511              | CCL25  | Chemokine (C-C motif) ligand 25                                                              |
| 855487 | Hs.527412              | ASAH1  | N-acylsphingosine amidohydrolase (acid ceramidase) 1                                         |
| 45645  | Hs.155090              | GNB5   | Guanine nucleotide binding protein (G protein), beta 5                                       |
| 725188 | Hs.526521              | MDH1   | Malate dehydrogenase 1, NAD (soluble)                                                        |
| 869538 | Hs.50098               | NDUFA4 | NADH dehydrogenase (ubiquinone) 1 alpha subcomplex, 4, 9kDa                                  |
| 866702 | Hs.436142              | PTPN13 | Protein tyrosine phosphatase, non-receptor type 13 (APO-1/CD95 (Fas)-associated phosphatase) |
| 796759 | Hs.699301              | VDAC3  | Voltage-dependent anion channel 3                                                            |
| 859422 | Hs.466148              | NR2F6  | Nuclear receptor subfamily 2, group F, member 6                                              |
| 869187 | Hs.468410              | EPAS1  | Endothelial PAS domain protein 1                                                             |
| 236333 | Hs.699822              | ISLR   | Immunoglobulin superfamily containing leucine-rich repeat                                    |
| 823691 | In multiple ClusterIDs |        |                                                                                              |
| 813818 | Hs.652255              | RRP8   | Ribosomal RNA processing 8, methyltransferase, homolog (yeast)                               |
| 897497 | Hs.659350              | HOXA10 | Homeobox A10                                                                                 |
| 179534 | Hs.161851              | KCNQ2  | Potassium voltage-gated channel, KQT-like subfamily, member 2                                |
| 813171 | Hs.372541              | KBTBD2 | Kelch repeat and BTB (POZ) domain containing 2                                               |
| 241985 | Hs.731866              |        | SNRPN                                                                                        |
| 212649 | Hs.1498                | HRG    | Histidine-rich glycoprotein                                                                  |
| 129146 | In multiple ClusterIDs |        |                                                                                              |
| 187266 | Hs.409137              |        | EIF2B2                                                                                       |
| 813591 | Hs.444776              |        | ACOT8                                                                                        |
| 363103 | Hs.597910              |        | Transcribed locus                                                                            |
| 768497 | Hs.143961              | CCL18  | Chemokine (C-C motif) ligand 18 (pulmonary and activation-regulated)                         |
| 246524 | Hs.24529               | CHEK1  | Checkpoint kinase 1                                                                          |
| 771084 | In multiple ClusterIDs |        |                                                                                              |

|         |                        |          |                                                                                   |
|---------|------------------------|----------|-----------------------------------------------------------------------------------|
| 211780  | Hs.69293               | HEXB     | Hexosaminidase B (beta polypeptide)                                               |
| 363575  | In multiple ClusterIDs |          |                                                                                   |
| 770462  | Hs.61995               | CPZ      | Carboxypeptidase Z                                                                |
| 511850  | In multiple ClusterIDs |          |                                                                                   |
| 684655  | Hs.437366              | PSMC2    | Proteasome (prosome, macropain) 26S subunit, ATPase, 2                            |
| 1912749 | Hs.505654              | ITGA5    | Integrin, alpha 5 (fibronectin receptor, alpha polypeptide)                       |
| 669485  | Hs.488293              | EGFR     | Epidermal growth factor receptor                                                  |
| 435597  | Hs.413899              | HTR3A    | 5-hydroxytryptamine (serotonin) receptor 3A, ionotropic                           |
| 501939  | Hs.461453              | WWOX     | WW domain containing oxidoreductase                                               |
| 729316  | In multiple ClusterIDs |          |                                                                                   |
| 2114698 | Hs.201805              | LAMC3    | Laminin, gamma 3                                                                  |
| 49553   | Hs.183153              | ARL4D    | ADP-ribosylation factor-like 4D                                                   |
| 25988   | Hs.433750              | EIF4G1   | Eukaryotic translation initiation factor 4 gamma, 1                               |
| 154359  | Hs.422585              | TWIST2   | Twist basic helix-loop-helix transcription factor 2                               |
| 1185969 | Hs.592082              | AXIN1    | Axin 1                                                                            |
| 470122* | Hs.484099              | KCNMB1   | Potassium large conductance calcium-activated channel, subfamily M, beta member 1 |
| 841308* | Hs.477375              | MYLK     | Myosin light chain kinase                                                         |
| 362059* | Hs.436367              | LAMA3    | Laminin, alpha 3                                                                  |
| 813828* | Hs.262857              | PRUNE2   | Prune homolog 2 (Drosophila)                                                      |
| 70332   | Hs.532492              | ACP2     | Acid phosphatase 2, lysosomal                                                     |
| 85643   | Hs.75599               | SERPINC1 | Serpin peptidase inhibitor, clade C (antithrombin), member 1                      |
| 869466  | Hs.529019              | BPI      | Bactericidal/permeability-increasing protein                                      |
| 795321  | Hs.116459              | MAN2A2   | Mannosidase, alpha, class 2A, member 2                                            |
| 823982  | In multiple ClusterIDs |          |                                                                                   |
| 769911  | Hs.432760              | CAPZB    | Capping protein (actin filament) muscle Z-line, beta                              |
| 42070   | Hs.153952              | NT5E     | 5'-nucleotidase, ecto (CD73)                                                      |
| 868838  | Hs.596913              | HPGD     | Hydroxyprostaglandin dehydrogenase 15-(NAD)                                       |
| 825604  | Hs.262886              | INPP5D   | Inositol polyphosphate-5-phosphatase, 145kDa                                      |
| 460487  | Hs.529517              | LTF      | Lactotransferrin                                                                  |
| 838366  | Hs.533444              | HMGCL    | 3-hydroxymethyl-3-methylglutaryl-CoA lyase                                        |
| 506658  | Hs.503692              | YAP1     | Yes-associated protein 1                                                          |
| 25807   | Hs.517044              | PHF20    | PHD finger protein 20                                                             |
| 2223790 | Hs.162807              | TFF1     | Trefoil factor 1                                                                  |
| 284799  | Hs.659607              |          | Transcribed locus                                                                 |

|         |                        |         |                                                                                            |
|---------|------------------------|---------|--------------------------------------------------------------------------------------------|
| 430314  | Hs.2899                | HPD     | 4-hydroxyphenylpyruvate dioxygenase                                                        |
| 1854658 | Hs.744928              | PTPRS   | Protein tyrosine phosphatase, receptor type, S                                             |
| 2108253 | Hs.471119              | BMPR2   | Bone morphogenetic protein receptor, type II (serine/threonine kinase)                     |
| 193736  | Hs.34012               | BRCA2   | Breast cancer 2, early onset                                                               |
| 121454  | Hs.654431              | ALOX12  | Arachidonate 12-lipoxygenase                                                               |
| 796323  | Hs.501012              | ADD3    | Adducin 3 (gamma)                                                                          |
| 845519  | Hs.271135              | ATP5C1  | ATP synthase, H <sup>+</sup> transporting, mitochondrial F1 complex, gamma polypeptide 1   |
| 740801  | Hs.433307              | BCKDHA  | Branched chain keto acid dehydrogenase E1, alpha polypeptide                               |
| 714213  | Hs.244139              | FAS     | Fas (TNF receptor superfamily, member 6)                                                   |
| 192569  | Hs.368794              | AP1B1   | Adaptor-related protein complex 1, beta 1 subunit                                          |
| 815303  | Hs.503787              | DARS    | Aspartyl-tRNA synthetase                                                                   |
| 797048  | Hs.68879               | BMP4    | Bone morphogenetic protein 4                                                               |
| 856454  | Hs.502769              | SLC3A2  | Solute carrier family 3 (activators of dibasic and neutral amino acid transport), member 2 |
| 896962  | Hs.507076              | ACADS   | Acyl-CoA dehydrogenase, C-2 to C-3 short chain                                             |
| 51950   | Hs.76152               | AQP1    | Aquaporin 1 (Colton blood group)                                                           |
| 25517   | Hs.517830              | BTD     | Biotinidase                                                                                |
| 454672  | Hs.499725              | ANK3    | Ankyrin 3, node of Ranvier (ankyrin G)                                                     |
| 868304* | Hs.500483              | ACTA2   | Actin, alpha 2, smooth muscle, aorta                                                       |
| 588822  | Hs.171458              | ENOX2   | Ecto-NOX disulfide-thiol exchanger 2                                                       |
| 756533  | Hs.501293              | BSG     | Basigin (Ok blood group)                                                                   |
| 74537   | Hs.518808              | AFP     | Alpha-fetoprotein                                                                          |
| 1736335 | Hs.395482              | PTK2    | Protein tyrosine kinase 2                                                                  |
| 1337007 | Hs.518451              | PIK3CD  | Phosphatidylinositol-4,5-bisphosphate 3-kinase, catalytic subunit delta                    |
| 2513307 | Hs.530402              | FAF1    | Fas (TNFRSF6) associated factor 1                                                          |
| 2383518 | Hs.744057              | THRAP3  | Thyroid hormone receptor associated protein 3                                              |
| 2164312 | Hs.119594              | CIT     | Citron (rho-interacting, serine/threonine kinase 21)                                       |
| 156     | In multiple ClusterIDs |         |                                                                                            |
| 725368  | Hs.521912              | RHPN1   | Rhopilin, Rho GTPase binding protein 1                                                     |
| 686909  | Hs.127897              | RAPGEF1 | Rap guanine nucleotide exchange factor (GEF) 1                                             |
| 1743966 | Hs.180919              | ID2     | Inhibitor of DNA binding 2, dominant negative helix-loop-helix protein                     |

|         |                        |         |                                                                                                        |
|---------|------------------------|---------|--------------------------------------------------------------------------------------------------------|
| 1       | In multiple ClusterIDs |         |                                                                                                        |
| 2329149 | Hs.16184               | RAD17   | RAD17 homolog ( <i>S. pombe</i> )                                                                      |
| 1028344 | Hs.368410              | CBX2    | Chromobox homolog 2                                                                                    |
| 221197  | Hs.435845              | ESRRB   | Estrogen-related receptor beta                                                                         |
| 648794  | Hs.660607              | ESR2    | Estrogen receptor 2 (ER beta)                                                                          |
| 84148   | Hs.57732               | MAPK11  | Mitogen-activated protein kinase 11                                                                    |
| 2298363 | Data not found         |         |                                                                                                        |
| 1018386 | Hs.681743              | ROCK2   | Rho-associated, coiled-coil containing protein kinase 2                                                |
| 767236  | In multiple ClusterIDs |         |                                                                                                        |
| 783998  | Hs.591085              | MLLT3   | Myeloid/lymphoid or mixed-lineage leukemia (trithorax homolog, <i>Drosophila</i> ); translocated to, 3 |
| 1475746 | Hs.655205              | ZNF124  | Zinc finger protein 124                                                                                |
| 1471829 | Hs.529631              | RPL35A  | Ribosomal protein L35a                                                                                 |
| 767475  | In multiple ClusterIDs |         |                                                                                                        |
| 897768  | Hs.476218              | COL7A1  | Collagen, type VII, alpha 1                                                                            |
| 1476065 | Hs.209983              | STMN1   | Stathmin 1                                                                                             |
| 1472689 | Hs.110675              | APOC1   | Apolipoprotein C-I                                                                                     |
| 786537  | Hs.518155              | PPP2R3A | Protein phosphatase 2, regulatory subunit B", alpha                                                    |
| 753157  | In multiple ClusterIDs |         |                                                                                                        |
| 1323328 | Hs.1019                | PTH1R   | Parathyroid hormone 1 receptor                                                                         |
| 1325816 | Hs.441072              | POLR2L  | Polymerase (RNA) II (DNA directed) polypeptide L, 7.6kDa                                               |
| 825333  | Hs.29679               | MED23   | Mediator complex subunit 23                                                                            |
| 978929  | Hs.729514              |         | Homo sapiens, clone IMAGE:5122250, mRNA                                                                |
| 265241  | Hs.42146               | PAX3    | Paired box 3                                                                                           |
| 2240486 | Hs.21907               | KAT7    | K(lysine) acetyltransferase 7                                                                          |
| 2166340 | Hs.106070              | CDKN1C  | Cyclin-dependent kinase inhibitor 1C (p57, Kip2)                                                       |
| 1144472 | Hs.497353              | MED6    | Mediator complex subunit 6                                                                             |
| 146605  | Hs.99855               | FPR2    | Formyl peptide receptor 2                                                                              |
| 156473  | Hs.212088              | EPHX2   | Epoxide hydrolase 2, cytoplasmic                                                                       |
| 812126  | Hs.654368              | GYPB    | Glycophorin B (MNS blood group)                                                                        |
| 197888  | Hs.5662                | GNB2L1  | Guanine nucleotide binding protein (G protein), beta polypeptide 2-like 1                              |
| 381931  | Hs.594454              | FLT1    | Fms-related tyrosine kinase 1                                                                          |
| 137017  | Hs.488293              | EGFR    | Epidermal growth factor receptor                                                                       |
| 267865  | In multiple ClusterIDs |         |                                                                                                        |
| 283034  | Hs.372616              | ARL1    | ADP-ribosylation factor-like 1                                                                         |

|          |                        |         |                                                                                                       |
|----------|------------------------|---------|-------------------------------------------------------------------------------------------------------|
| 1469292  | Hs.727148              | PIM2    | Pim-2 oncogene                                                                                        |
| 1456900  | Hs.109                 | DPEP1   | Dipeptidase 1 (renal)                                                                                 |
| 626822   | Hs.130031              | TRIO    | Trio Rho guanine nucleotide exchange factor                                                           |
| 897158   | Hs.247077              | RHOA    | Ras homolog family member A                                                                           |
| 1475595  | Hs.75431               | ALPL    | Alkaline phosphatase, liver/bone/kidney                                                               |
| 1473274* | Hs.504687              | MYL9    | Myosin, light chain 9, regulatory                                                                     |
| 321389   | Hs.534453              | NDUFA13 | NADH dehydrogenase (ubiquinone) 1 alpha subcomplex, 13                                                |
| 882522   | Hs.160786              | ASS1    | Argininosuccinate synthase 1                                                                          |
| 1470048  | Hs.521903              | LY6E    | Lymphocyte antigen 6 complex, locus E                                                                 |
| 1325751  | Hs.571258              | CYP3A5  | Cytochrome P450, family 3, subfamily A, polypeptide 5                                                 |
| 296998   | Hs.655792              | ART4    | ADP-ribosyltransferase 4 (Dombrock blood group)                                                       |
| 768246   | In multiple ClusterIDs |         |                                                                                                       |
| 221092   | Hs.654350              | GABPB1  | GA binding protein transcription factor, beta subunit 1                                               |
| 241788   | Hs.300774              | FGB     | Fibrinogen beta chain                                                                                 |
| 563444   | Hs.125898              | GNAS    | GNAS complex locus                                                                                    |
| 741474   | Hs.466471              | GPI     | Glucose-6-phosphate isomerase                                                                         |
| 183200   | Hs.73875               | FAH     | Fumarylacetoacetate hydrolase (fumarylacetoacetase)                                                   |
| 135449   | Hs.374477              | EWSR1   | Ewing sarcoma breakpoint region 1                                                                     |
| 178779   | Hs.136295              | GNAL    | Guanine nucleotide binding protein (G protein), alpha activating activity polypeptide, olfactory type |
| 127509   | Hs.436062              | GBE1    | Glucan (1,4-alpha-), branching enzyme 1                                                               |
| 133213   | Hs.390420              |         | FUT4                                                                                                  |
| 209296   | In multiple ClusterIDs |         |                                                                                                       |
| 195340   | Hs.418497              | GC      | Group-specific component (vitamin D binding protein)                                                  |
| 681906   | Hs.1422                | FGR     | Gardner-Rasheed feline sarcoma viral (v-fgr) oncogene homolog                                         |
| 669419   | Hs.20685               | FXN     | Frataxin                                                                                              |
| 49509    | Hs.631624              | EPOR    | Erythropoietin receptor                                                                               |
| 308041   | In multiple ClusterIDs |         |                                                                                                       |
| 26162    | Hs.116250              | GABRA2  | Gamma-aminobutyric acid (GABA) A receptor, alpha 2                                                    |
| 591683   | Hs.80409               |         | GADD45A                                                                                               |
| 839736   | Hs.53454               | CRYAB   | Crystallin, alpha B                                                                                   |
| 825335   | Hs.185597              | SPG7    | Spastic paraplegia 7 (pure and complicated autosomal recessive)                                       |



|         |                        |         |                                                                                |
|---------|------------------------|---------|--------------------------------------------------------------------------------|
| 77805   | Hs.681616              | COPB2   | Coatomer protein complex, subunit beta 2 (beta prime)                          |
| 767817  | Hs.436578              | POLR2F  | Polymerase (RNA) II (DNA directed) polypeptide F                               |
| 701231  | Hs.115617              | CRHBP   | Corticotropin releasing hormone binding protein                                |
| 898286  | Hs.732435              | CDK1    | Cyclin-dependent kinase 1                                                      |
| 310519  | Hs.361463              | F10     | Coagulation factor X                                                           |
| 630013  | Hs.597656              | MSH2    | MutS homolog 2, colon cancer, nonpolyposis type 1 (E. coli)                    |
| 418422  | Hs.2164                | PPBP    | Pro-platelet basic protein (chemokine (C-X-C motif) ligand 7)                  |
| 687875  | Hs.181301              | CTSS    | Cathepsin S                                                                    |
| 897655  | Hs.196983              | SSFA2   | Sperm specific antigen 2                                                       |
| 197657* | Hs.436219              | ALDH1B1 | Aldehyde dehydrogenase 1 family, member B1                                     |
| 248463  | Hs.585357              | HBZ     | Hemoglobin, zeta                                                               |
| 295986  | Hs.30619               | EBP     | Emopamil binding protein (sterol isomerase)                                    |
| 745339  | Hs.279912              | CCP110  | Centriolar coiled coil protein 110kDa                                          |
| 743701  | Hs.106311              | DGCR9   | DiGeorge syndrome critical region gene 9                                       |
| 253009  | Hs.642877              | MALAT1  | Metastasis associated lung adenocarcinoma transcript 1<br>(non-protein coding) |
| 741958  | In multiple ClusterIDs |         |                                                                                |
| 784777  | Hs.183850              | DCTD    | DCMP deaminase                                                                 |
| 782760  | Hs.644076              |         | Transcribed locus                                                              |
| 796984  | In multiple ClusterIDs |         |                                                                                |
| 838568  | Hs.351875              | COX6C   | Cytochrome c oxidase subunit VIc                                               |
| 825060  | Hs.527980              | DUT     | Deoxyuridine triphosphatase                                                    |
| 795296  | Hs.292524              | CCNH    | Cyclin H                                                                       |
| 756211  | Hs.443417              | MINK1   | Misshapen-like kinase 1                                                        |
| 51814   | Hs.695                 | CSTB    | Cystatin B (stefin B)                                                          |
| 824031  | Hs.445203              | DNAJA1  | DnaJ (Hsp40) homolog, subfamily A, member 1                                    |
| 950690  | Hs.58974               | CCNA2   | Cyclin A2                                                                      |
| 795830  | Hs.479867              | CENPC1  | Centromere protein C 1                                                         |
| 505059  | Hs.195040              | HSD11B1 | Hydroxysteroid (11-beta) dehydrogenase 1                                       |
| 297895  | Hs.436066              | LST1    | Leukocyte specific transcript 1                                                |
| 856427  | Hs.436187              | TRIP13  | Thyroid hormone receptor interactor 13                                         |
| 343700  | In multiple ClusterIDs |         |                                                                                |
| 295857  | Hs.50282               | RRAGB   | Ras-related GTP binding B                                                      |
| 447786  | Hs.21631               | AUTS2   | Autism susceptibility candidate 2                                              |

|         |                        |        |                                                                                         |
|---------|------------------------|--------|-----------------------------------------------------------------------------------------|
| 131268  | Hs.411881              | GRB14  | Growth factor receptor-bound protein 14                                                 |
| 745116  | Hs.284279              | HMOX2  | Heme oxygenase (decycling) 2                                                            |
| 293964  | Hs.191510              | BTN3A1 | Butyrophilin, subfamily 3, member A1                                                    |
| 742949  | In multiple ClusterIDs |        |                                                                                         |
| 502565  | Hs.501735              | STIM1  | Stromal interaction molecule 1                                                          |
| 361698  | Hs.656980              | LIPE   | Lipase, hormone-sensitive                                                               |
| 854899  | Hs.298654              | DUSP6  | Dual specificity phosphatase 6                                                          |
| 281881  | Hs.269211              | ZMYM4  | Zinc finger, MYM-type 4                                                                 |
| 175536  | Hs.113882              | GABRD  | Gamma-aminobutyric acid (GABA) A receptor, delta                                        |
| 1031076 | Hs.98428               | HOXB6  | Homeobox B6                                                                             |
| 26249   | Hs.75149               | SH3GL2 | SH3-domain GRB2-like 2                                                                  |
| 590591  | Hs.525401              | ADCY6  | Adenylate cyclase 6                                                                     |
| 624429  | In multiple ClusterIDs |        |                                                                                         |
| 303035  | Hs.497626              | PLXNA2 | Plexin A2                                                                               |
| 415769  | Hs.369675              |        | ANGPT1                                                                                  |
| 21908   | In multiple ClusterIDs |        |                                                                                         |
| 182177  | Hs.404914              | ADAM17 | ADAM metallopeptidase domain 17                                                         |
| 309864  | Hs.25292               | JUNB   | Jun B proto-oncogene                                                                    |
| 416567  | Hs.741309              |        | Transcribed locus, strongly similar to NP_000615.3 SERPINA5 gene product [Homo sapiens] |
| 25621   | Hs.160958              | CDC37  | Cell division cycle 37                                                                  |
| 201268  | Hs.288741              | EFNA5  | Ephrin-A5                                                                               |
| 322525  | Hs.4817                | OPCML  | Opioid binding protein/cell adhesion molecule-like                                      |
| 428223  | Hs.472437              | MAPRE1 | Microtubule-associated protein, RP/EB family, member 1                                  |
| 38059   | Hs.530871              | PDE1B  | Phosphodiesterase 1B, calmodulin-dependent                                              |
| 222107  | Hs.479756              | KDR    | Kinase insert domain receptor (a type III receptor tyrosine kinase)                     |
| 324383  | Hs.284244              | FGF2   | Fibroblast growth factor 2 (basic)                                                      |
| 433528  | Hs.631624              | EPOR   | Erythropoietin receptor                                                                 |
| 47021   | Hs.731450              | DVL1   | Dishevelled, dsh homolog 1 (Drosophila)                                                 |
| 245761  | Hs.517601              | RAC2   | Ras-related C3 botulinum toxin substrate 2 (rho family, small GTP binding protein Rac2) |
| 325487  | Hs.505654              | ITGA5  | Integrin, alpha 5 (fibronectin receptor, alpha polypeptide)                             |
| 436121  | Hs.533717              | DLK1   | Delta-like 1 homolog (Drosophila)                                                       |
| 884438  | Hs.744006              | NFE2L2 | Nuclear factor (erythroid-derived 2)-like 2                                             |

|        |                        |         |                                                                                 |
|--------|------------------------|---------|---------------------------------------------------------------------------------|
| 770454 | Hs.108969              | WDR83OS | WD repeat domain 83 opposite strand                                             |
| 884644 | Hs.449909              | RPSA    | Ribosomal protein SA                                                            |
| 491486 | In multiple ClusterIDs |         |                                                                                 |
| 447509 | Hs.631991              | HLA-DOA | Major histocompatibility complex, class II, DO alpha                            |
| 138369 | Hs.654395              | FCGR2B  | Fc fragment of IgG, low affinity IIb, receptor (CD32)                           |
| 346696 | Hs.94865               | TEAD4   | TEA domain family member 4                                                      |
| 83444  | Hs.952                 | SLC10A1 | Solute carrier family 10 (sodium/bile acid cotransporter family), member 1      |
| 72395  | Hs.655432              | MST1L   | Macrophage stimulating 1-like                                                   |
| 586796 | Hs.84905               | KRT20   | Keratin 20                                                                      |
| 755299 | Hs.501629              | IER2    | Immediate early response 2                                                      |
| 241847 | Hs.513522              |         | Transcribed locus                                                               |
| 160664 | Hs.350321              | RET     | Ret proto-oncogene                                                              |
| 292779 | Hs.388034              | RXRB    | Retinoid X receptor, beta                                                       |
| 377671 | Hs.524484              | ITGA7   | Integrin, alpha 7                                                               |
| 365348 | Hs.46894               | FUS     | Fused in sarcoma                                                                |
| 173392 | Hs.647388              | ARHGDIG | Rho GDP dissociation inhibitor (GDI) gamma                                      |
| 810974 | Hs.3068                | HLTF    | Helicase-like transcription factor                                              |
| 135527 | Hs.458917              | SCAMP2  | Secretory carrier membrane protein 2                                            |
| 159455 | Hs.257008              | PLD3    | Phospholipase D family, member 3                                                |
| 771206 | Hs.306791              | POLD2   | Polymerase (DNA directed), delta 2, accessory subunit                           |
| 35077  | Hs.21639               |         | SPEG                                                                            |
| 810761 | Hs.534377              | CLDN10  | Claudin 10                                                                      |
| 731648 | Hs.10441               | NFYA    | Nuclear transcription factor Y, alpha                                           |
| 759163 | Hs.296049              | MFAP4   | Microfibrillar-associated protein 4                                             |
| 855910 | Hs.531081              | LGALS3  | Lectin, galactoside-binding, soluble, 3                                         |
| 361899 | Hs.157883              | ZSCAN26 | Zinc finger and SCAN domain containing 26                                       |
| 878835 | Hs.522615              | NDP     | Norrie disease (pseudoglioma)                                                   |
| 45600  | Hs.130607              | MVK     | Mevalonate kinase                                                               |
| 324618 | Hs.632704              | TSMF    | Ts translation elongation factor, mitochondrial                                 |
| 590692 | Hs.517033              | TGM2    | Transglutaminase 2 (C polypeptide, protein-glutamine-gamma-glutamyltransferase) |
| 868484 | Hs.715623              | NPC1    | Niemann-Pick disease, type C1                                                   |
| 784589 | Hs.80343               | MMP15   | Matrix metalloproteinase 15 (membrane-inserted)                                 |
| 857264 | Hs.600913              |         | Transcribed locus                                                               |
| 502669 | Hs.3352                | HDAC2   | Histone deacetylase 2                                                           |

|        |                        |         |                                                                                                 |
|--------|------------------------|---------|-------------------------------------------------------------------------------------------------|
| 194005 | Hs.658489              |         | CLCC1                                                                                           |
| 247281 | Hs.46468               | CCR6    | Chemokine (C-C motif) receptor 6                                                                |
| 548957 | In multiple ClusterIDs |         |                                                                                                 |
| 202535 | In multiple ClusterIDs |         |                                                                                                 |
| 138917 | Hs.437922              | MYCL1   | V-myc myelocytomatosis viral oncogene homolog 1, lung carcinoma derived (avian)                 |
| 123400 | Hs.727344              | KHSRP   | KH-type splicing regulatory protein                                                             |
| 213136 | Hs.519162              | BTG2    | BTG family, member 2                                                                            |
| 812105 | Hs.75823               | MLLT11  | Myeloid/lymphoid or mixed-lineage leukemia (trithorax homolog, Drosophila); translocated to, 11 |
| 307553 | Hs.505033              | KRAS    | V-Ki-ras2 Kirsten rat sarcoma viral oncogene homolog                                            |
| 813827 | In multiple ClusterIDs |         |                                                                                                 |
| 175123 | Hs.150136              | MAPK7   | Mitogen-activated protein kinase 7                                                              |
| 135773 | Hs.442707              | TERF1   | Telomeric repeat binding factor (NIMA-interacting) 1                                            |
| 34852  | In multiple ClusterIDs |         |                                                                                                 |
| 361097 | Hs.518773              | UBE2D3  | Ubiquitin-conjugating enzyme E2D 3                                                              |
| 813184 | Hs.76090               | TNFAIP1 | Tumor necrosis factor, alpha-induced protein 1 (endothelial)                                    |
| 193067 | In multiple ClusterIDs |         |                                                                                                 |
| 128783 | Hs.161377              | PEX13   | Peroxisomal biogenesis factor 13                                                                |
| 327150 | Hs.159195              | DOCK1   | Dedicator of cytokinesis 1                                                                      |
| 38763  | Hs.296169              |         | RAB4A                                                                                           |
| 241874 | Hs.441378              | ACAD11  | Acyl-CoA dehydrogenase family, member 11                                                        |
| 293539 | Data not found         |         |                                                                                                 |
| 202213 | Hs.348350              | DHRS1   | Dehydrogenase/reductase (SDR family) member 1                                                   |
| 66534  | Hs.89771               | GCKR    | Glucokinase (hexokinase 4) regulator                                                            |
| 140354 | Hs.144980              | SCAMP4  | Secretory carrier membrane protein 4                                                            |
| 137638 | Hs.462693              |         | ZNF22                                                                                           |
| 248649 | Hs.75277               | RMND5A  | Required for meiotic nuclear division 5 homolog A (S. cerevisiae)                               |
| 280882 | Hs.504281              | FLI1    | Friend leukemia virus integration 1                                                             |
| 126792 | Hs.731768              |         | Transcribed locus                                                                               |
| 165921 | Hs.443976              | CEP250  | Centrosomal protein 250kDa                                                                      |
| 292920 | Hs.432706              | ANKRD44 | Ankyrin repeat domain 44                                                                        |
| 22770* | Hs.7195                | GABRG2  | Gamma-aminobutyric acid (GABA) A receptor, gamma 2                                              |

|          |                        |          |                                                                                       |
|----------|------------------------|----------|---------------------------------------------------------------------------------------|
| 1674185* | Hs.351665              | TRDMT1   | TRNA aspartic acid methyltransferase 1                                                |
| 5222483* | Hs.463412              | SGCA     | Sarcoglycan, alpha (50kDa dystrophin-associated glycoprotein)                         |
| 432651   | Hs.44402               | CSTF3    | Cleavage stimulation factor, 3' pre-RNA, subunit 3, 77kDa                             |
| 744417   | Hs.12068               | CRAT     | Carnitine O-acetyltransferase                                                         |
| 26568    | Hs.534313              | EGR3     | Early growth response 3                                                               |
| 757144   | In multiple ClusterIDs |          |                                                                                       |
| 264640   | Hs.484241              | CLTB     | Clathrin, light chain B                                                               |
| 26295    | Hs.75110               | CNR1     | Cannabinoid receptor 1 (brain)                                                        |
| 83083    | Hs.76716               | ITIH3    | Inter-alpha-trypsin inhibitor heavy chain 3                                           |
| 201168   | Hs.412836              | LRR8C    | Leucine rich repeat containing 8 family, member C                                     |
| 133114   | Hs.25338               | PRSS23   | Protease, serine, 23                                                                  |
| 344672   | Hs.15536               | ZCCHC9   | Zinc finger, CCHC domain containing 9                                                 |
| 196387   | Hs.368243              | ABCC2    | ATP-binding cassette, sub-family C (CFTR/MRP), member 2                               |
| 140100   | Hs.486410              | ECHDC1   | Enoyl CoA hydratase domain containing 1                                               |
| 122822   | Hs.462323              | NCOR1    | Nuclear receptor corepressor 1                                                        |
| 230562   | Hs.124490              | ACIN1    | Apoptotic chromatin condensation inducer 1                                            |
| 127925   | Hs.744922              | DDX18    | DEAD (Asp-Glu-Ala-Asp) box polypeptide 18                                             |
| 246035   | In multiple ClusterIDs |          |                                                                                       |
| 824044   | Hs.159069              | LARP4B   | La ribonucleoprotein domain family, member 4B                                         |
| 293403   | Hs.127411              | CDC14A   | Cell division cycle 14A                                                               |
| 251591   | Hs.283565              | FOSL1    | FOS-like antigen 1                                                                    |
| 759200   | Hs.79064               | DHPS     | Deoxyhypusine synthase                                                                |
| 868652   | Hs.534847              | C4A      | Complement component 4A (Rodgers blood group)                                         |
| 858292   | Hs.191346              | Sep-07   | Septin 7                                                                              |
| 39722    | Hs.487294              | ERCC2    | Excision repair cross-complementing rodent repair deficiency, complementation group 2 |
| 769579   | Hs.465627              | MAP2K2   | Mitogen-activated protein kinase kinase 2                                             |
| 756556   | Hs.384598              | SERPING1 | Serpin peptidase inhibitor, clade G (C1 inhibitor), member 1                          |
| 345538   | Hs.731507              | CTSL1    | Cathepsin L1                                                                          |
| 884894   | Hs.151777              | EIF2S1   | Eukaryotic translation initiation factor 2, subunit 1 alpha, 35kDa                    |
| 469369   | Hs.24301               | POLR2E   | Polymerase (RNA) II (DNA directed) polypeptide E, 25kDa                               |
| 878280   | Hs.135270              | CRMP1    | Collapsin response mediator protein 1                                                 |
| 897164   | Hs.445981              | CTNNA1   | Catenin (cadherin-associated protein), alpha 1, 102kDa                                |
| 47359    | Hs.511899              | EDN1     | Endothelin 1                                                                          |

|         |             |          |                                                                                                           |
|---------|-------------|----------|-----------------------------------------------------------------------------------------------------------|
| 128493  | Hs.195364   | MLH1     | MutL homolog 1, colon cancer, nonpolyposis type 2 (E. coli)                                               |
| 491692  | Hs.17441    | COL4A1   | Collagen, type IV, alpha 1                                                                                |
| 854138  | Hs.474833   | CSNK1E   | Casein kinase 1, epsilon                                                                                  |
| 781017  | Hs.1395     | EGR2     | Early growth response 2                                                                                   |
| 345063  | Hs.635      | CACNB1   | Calcium channel, voltage-dependent, beta 1 subunit                                                        |
| 1926453 | Hs.270833   | AREG     | Amphiregulin                                                                                              |
| 2119600 | Hs.460996   | TRADD    | TNFRSF1A-associated via death domain                                                                      |
| 1650500 | Hs.603111   | RND2     | Rho family GTPase 2                                                                                       |
| 1741102 | Hs.279594   | TNFRSF1A | Tumor necrosis factor receptor superfamily, member 1A                                                     |
| 1927412 | Hs.631709   | RAD51    | RAD51 homolog (S. cerevisiae)                                                                             |
| 2139081 | Hs.478150   | PDCD10   | Programmed cell death 10                                                                                  |
| 1656179 | Hs.113157   | ITGA9    | Integrin, alpha 9                                                                                         |
| 1743833 | Hs.516664   | EFNA1    | Ephrin-A1                                                                                                 |
| 1932948 | Hs.673      | IL12A    | Interleukin 12A (natural killer cell stimulatory factor 1, cytotoxic lymphocyte maturation factor 1, p35) |
| 2146122 | Hs.133397   | ITGA6    | Integrin, alpha 6                                                                                         |
| 1667384 | Hs.190028   | GSTO1    | Glutathione S-transferase omega 1                                                                         |
| 1752018 | Hs.507590   | FLT3     | Fms-related tyrosine kinase 3                                                                             |
| 1935352 | Hs.2159     | ACAN     | Aggrecan                                                                                                  |
| 2149968 | Hs.647029   | FZD9     | Frizzled family receptor 9                                                                                |
| 1677204 | Hs.356624   | NID1     | Nidogen 1                                                                                                 |
| 1837155 | Hs.2633     | DSG1     | Desmoglein 1                                                                                              |
| 2009666 | Hs.116092   | EPHB1    | EPH receptor B1                                                                                           |
| 2159880 | Hs.419815   | EGF      | Epidermal growth factor                                                                                   |
| 1032004 | Hs.415299   | ITPA     | Inosine triphosphatase (nucleoside triphosphate pyrophosphatase)                                          |
| 855620  | Hs.505735   | NACA     | Nascent polypeptide-associated complex alpha subunit                                                      |
| 842973  | Hs.524498   | PA2G4    | Proliferation-associated 2G4, 38kDa                                                                       |
| 511459  | Hs.658566   | PDIA3P   | Protein disulfide isomerase family A, member 3 pseudogene                                                 |
| 769942  | Hs.612151   | KIF22    | Kinesin family member 22                                                                                  |
| 951142  | Hs.409065   | FEN1     | Flap structure-specific endonuclease 1                                                                    |
| 594322  | Hs.368610   | PAPSS1   | 3'-phosphoadenosine 5'-phosphosulfate synthase 1                                                          |
| 416643  | Hs.151624   | HCRTR2   | Hypocretin (orexin) receptor 2                                                                            |
| 366132  | Hs.444472   | SDHC     | Succinate dehydrogenase complex, subunit C, integral membrane protein, 15kDa                              |
| 626531  | In multiple |          |                                                                                                           |

|         |                        |          |                                                                                                  |
|---------|------------------------|----------|--------------------------------------------------------------------------------------------------|
|         | ClusterIDs             |          |                                                                                                  |
| 509943  | Hs.4747                | DKC1     | Dyskeratosis congenita 1, dyskerin                                                               |
| 784253  | Hs.474938              | SLC25A17 | Solute carrier family 25 (mitochondrial carrier; peroxisomal membrane protein, 34kDa), member 17 |
| 1637226 | Hs.428                 | FLT3LG   | Fms-related tyrosine kinase 3 ligand                                                             |
| 1734372 | Hs.562227              | HSPG2    | Heparan sulfate proteoglycan 2                                                                   |
| 1902522 | Hs.632586              | CXCL10   | Chemokine (C-X-C motif) ligand 10                                                                |
| 2108696 | Hs.512599              | CDKN2A   | Cyclin-dependent kinase inhibitor 2A                                                             |
| 1646946 | Hs.119882              | CDK6     | Cyclin-dependent kinase 6                                                                        |
| 1735565 | Hs.187898              | NF2      | Neurofibromin 2 (merlin)                                                                         |
| 469686  | Hs.491234              | RIT1     | Ras-like without CAAX 1                                                                          |
| 166236  | Hs.289108              | FAM3A    | Family with sequence similarity 3, member A                                                      |
| 66317   | Hs.7644                | HIST1H1C | Histone cluster 1, H1c                                                                           |
| 27548   | Hs.601591              | NUP153   | Nucleoporin 153kDa                                                                               |
| 177621  | In multiple ClusterIDs |          |                                                                                                  |
| 210317  | Hs.626404              | RAB11B   | RAB11B, member RAS oncogene family                                                               |
| 838149  | Hs.435771              | API5     | Apoptosis inhibitor 5                                                                            |
| 530035  | Hs.516505              | S100A13  | S100 calcium binding protein A13                                                                 |
| 950568  | Hs.533855              | UPF3A    | UPF3 regulator of nonsense transcripts homolog A (yeast)                                         |
| 897865  | Hs.27695               | MID1     | Midline 1 (Opitz/BBB syndrome)                                                                   |
| 884822  | Hs.50425               | PTGES3   | Prostaglandin E synthase 3 (cytosolic)                                                           |
| 530282  | Hs.534168              | NDUFA1   | NADH dehydrogenase (ubiquinone) 1 alpha subcomplex, 1, 7.5kDa                                    |
| 780977  | Hs.523131              | TRAPPC3  | Trafficking protein particle complex 3                                                           |
| 773511  | Hs.30792               | HOOK2    | Hook homolog 2 (Drosophila)                                                                      |
| 82903   | Hs.370937              | TAPBP    | TAP binding protein (tapasin)                                                                    |
| 324122  | Hs.129944              | ESM1     | Endothelial cell-specific molecule 1                                                             |
| 796946  | In multiple ClusterIDs |          |                                                                                                  |
| 270136  | In multiple ClusterIDs |          |                                                                                                  |
| 811827  | Hs.222055              | NDST1    | N-deacetylase/N-sulfotransferase (heparan glucosaminyl) 1                                        |
| 668442  | Hs.593833              | DDR2     | Discoidin domain receptor tyrosine kinase 2                                                      |
| 154465  | Hs.10136               | BPHL     | Biphenyl hydrolase-like (serine hydrolase)                                                       |
| 471266  | Hs.410965              | DGCR6L   | DiGeorge syndrome critical region gene 6-like                                                    |
| 233457  | Hs.302145              |          | HBG2                                                                                             |
| 45272   | Hs.193043              | CLCN6    | Chloride channel, voltage-sensitive 6                                                            |

|        |                        |          |                                                                                                     |
|--------|------------------------|----------|-----------------------------------------------------------------------------------------------------|
| 137794 | Hs.174273              | ACVR2B   | Activin A receptor, type IIB                                                                        |
| 341246 | Hs.515092              | CLPP     | ClpP caseinolytic peptidase, ATP-dependent, proteolytic subunit homolog (E. coli)                   |
| 770066 | Hs.438550              | NCAPD3   | Non-SMC condensin II complex, subunit D3                                                            |
| 179283 | Hs.270055              | SH3GL3   | SH3-domain GRB2-like 3                                                                              |
| 194214 | Hs.373550              |          | TGIF1                                                                                               |
| 254321 | In multiple ClusterIDs |          |                                                                                                     |
| 309316 | Hs.75636               | MYL7     | Myosin, light chain 7, regulatory                                                                   |
| 234011 | Hs.164384              | PKP2     | Plakophilin 2                                                                                       |
| 366558 | In multiple ClusterIDs |          |                                                                                                     |
| 70349  | Hs.584654              | FOXO4    | Forkhead box O4                                                                                     |
| 153411 | Hs.520048              | HLA-DRA  | Major histocompatibility complex, class II, DR alpha                                                |
| 589433 | Hs.484222              | RTCA     | RNA 3'-terminal phosphate cyclase                                                                   |
| 753862 | In multiple ClusterIDs |          |                                                                                                     |
| 142788 | Hs.596449              | SERPINH1 | Serpin peptidase inhibitor, clade H (heat shock protein 47), member 1, (collagen binding protein 1) |
| 841059 | Hs.516155              | CAPG     | Capping protein (actin filament), gelsolin-like                                                     |
| 739183 | Hs.647419              | CD68     | CD68 molecule                                                                                       |
| 813830 | Hs.289271              | CYC1     | Cytochrome c-1                                                                                      |
| 284882 | Hs.408182              | COL2A1   | Collagen, type II, alpha 1                                                                          |
| 277015 | Data not found         |          |                                                                                                     |
| 504226 | Hs.443057              | CD53     | CD53 molecule                                                                                       |
| 83231  | Hs.1360                | CYP2B6   | Cytochrome P450, family 2, subfamily B, polypeptide 6                                               |
| 758148 | Hs.654450              | F8       | Coagulation factor VIII, procoagulant component                                                     |
| 69672  | Hs.76206               | CDH5     | Cadherin 5, type 2 (vascular endothelium)                                                           |
| 306013 | Hs.438040              |          | Transcribed locus                                                                                   |
| 757248 | Hs.733336              |          | Transcribed locus                                                                                   |
| 435855 | Hs.729074              | HCG8     | HLA complex group 8                                                                                 |
| 223128 | Hs.531754              | MAP2K7   | Mitogen-activated protein kinase kinase 7                                                           |
| 757489 | In multiple ClusterIDs |          |                                                                                                     |
| 869450 | Hs.719951              | RPL11    | Ribosomal protein L11                                                                               |
| 487425 | Hs.591767              | CETN3    | Centrin, EF-hand protein, 3                                                                         |
| 365641 | Hs.534339              | PRIM1    | Primase, DNA, polypeptide 1 (49kDa)                                                                 |
| 83210  | In multiple ClusterIDs |          |                                                                                                     |



|         |                        |          |                                                             |
|---------|------------------------|----------|-------------------------------------------------------------|
| 898035  | Hs.520898              | CTSB     | Cathepsin B                                                 |
| 42880   | Hs.382306              |          | CDK8                                                        |
| 841478  | Hs.352677              | FBXO11   | F-box protein 11                                            |
| 85624   | Hs.1012                | C4BPA    | Complement component 4 binding protein, alpha               |
| 839101  | Hs.74471               | GJA1     | Gap junction protein, alpha 1, 43kDa                        |
| 843049  | Hs.460184              | MCM4     | Minichromosome maintenance complex component 4              |
| 66564   | Hs.274539              | BDH1     | 3-hydroxybutyrate dehydrogenase, type 1                     |
| 85128   | Hs.8986                | C1QB     | Complement component 1, q subcomponent, B chain             |
| 711552  | Hs.88778               | CBR1     | Carbonyl reductase 1                                        |
| 795827  | Hs.708096              | TESK1    | Testis-specific kinase 1                                    |
| 434826  | Hs.558440              | AP5Z1    | Adaptor-related protein complex 5, zeta 1 subunit           |
| 433111  | Hs.3459                | UBFD1    | Ubiquitin family domain containing 1                        |
| 739109  | Hs.119591              | AP2S1    | Adaptor-related protein complex 2, sigma 1 subunit          |
| 611586  | Hs.588655              | NEB      | Nebulin                                                     |
| 51743   | In multiple ClusterIDs |          |                                                             |
| 293792  | Hs.408241              | NUPL2    | Nucleoporin like 2                                          |
| 586854  | Hs.193557              | PTPN14   | Protein tyrosine phosphatase, non-receptor type 14          |
| 1031185 | Hs.111850              | SMCP     | Sperm mitochondria-associated cysteine-rich protein         |
| 32241   | Hs.594723              |          | Transcribed locus                                           |
| 770000  | Hs.723478              | EP400    | E1A binding protein p400                                    |
| 770337  | Hs.132868              | USP32    | Ubiquitin specific peptidase 32                             |
| 460403  | Hs.702528              |          | Transcribed locus                                           |
| 298128  | Hs.555902              | ASAP2    | ArfGAP with SH3 domain, ankyrin repeat and PH domain 2      |
| 203130  | Hs.323342              |          | ARPC4                                                       |
| 433666  | Hs.474949              | RBX1     | Ring-box 1, E3 ubiquitin protein ligase                     |
| 60565   | In multiple ClusterIDs |          |                                                             |
| 248957  | Hs.592737              |          | Transcribed locus                                           |
| 49311   | Hs.731384              | MLL2     | Myeloid/lymphoid or mixed-lineage leukemia 2                |
| 345158  | Hs.517352              |          | PRODH                                                       |
| 484874  | Hs.218040              | ITGB3    | Integrin, beta 3 (platelet glycoprotein IIIa, antigen CD61) |
| 139167  | Hs.510324              | QKI      | QKI, KH domain containing, RNA binding                      |
| 273938  | In multiple ClusterIDs |          |                                                             |
| 358433  | Hs.26550               | RXRG     | Retinoid X receptor, gamma                                  |
| 487777  | Hs.408528              | RB1      | Retinoblastoma 1                                            |
| 145383  | Hs.401929              | DNASE1L1 | Deoxyribonuclease I-like 1                                  |

|        |                        |          |                                                                                     |
|--------|------------------------|----------|-------------------------------------------------------------------------------------|
| 284701 | Hs.654487              | FOLH1    | Folate hydrolase (prostate-specific membrane antigen) 1                             |
| 361456 | Hs.505777              |          | DDIT3                                                                               |
| 491113 | Hs.116471              | CDH11    | Cadherin 11, type 2, OB-cadherin (osteoblast)                                       |
| 146858 | Hs.249441              | WEE1     | WEE1 homolog (S. pombe)                                                             |
| 285780 | Hs.2936                | MMP13    | Matrix metalloproteinase 13 (collagenase 3)                                         |
| 364843 | Hs.80828               | KRT1     | Keratin 1                                                                           |
| 510856 | In multiple ClusterIDs |          |                                                                                     |
| 154790 | Hs.415768              | NGFR     | Nerve growth factor receptor                                                        |
| 289606 | Hs.168132              | IL15     | Interleukin 15                                                                      |
| 366481 | Hs.708950              | KRT6B    | Keratin 6B                                                                          |
| 586803 | Hs.252820              | PGF      | Placental growth factor                                                             |
| 462953 | Hs.654473              | MAOB     | Monoamine oxidase B                                                                 |
| 853906 | Hs.712829              |          | M4-50 mRNA for HLA class I antigen                                                  |
| 588915 | Hs.532634              | IFI27    | Interferon, alpha-inducible protein 27                                              |
| 51022  | Hs.302341              | ST8SIA2  | ST8 alpha-N-acetyl-neuraminide alpha-2,8-sialyltransferase 2                        |
| 433553 | Hs.592035              |          | Transcribed locus, strongly similar to NP_001730.1 CA5A gene product [Homo sapiens] |
| 345232 | Hs.36                  |          | LTA                                                                                 |
| 415899 | Hs.500546              | IDE      | Insulin-degrading enzyme                                                            |
| 770837 | Hs.397891              | PASK     | PAS domain containing serine/threonine kinase                                       |
| 586839 | Hs.517949              | MAP4     | Microtubule-associated protein 4                                                    |
| 868169 | Hs.180878              | LPL      | Lipoprotein lipase                                                                  |
| 51582  | Hs.207631              | LMO7     | LIM domain 7                                                                        |
| 769948 | Hs.104879              | SERPINB9 | Serpin peptidase inhibitor, clade B (ovalbumin), member 9                           |
| 51817  | Hs.517603              | MFNG     | MFNG O-fucosylpeptide<br>3-beta-N-acetylglucosaminyltransferase                     |
| 257369 | Hs.151413              | GMFB     | Glia maturation factor, beta                                                        |
| 341763 | Hs.213327              | CASP5    | Caspase 5, apoptosis-related cysteine peptidase                                     |
| 446814 | Hs.522891              | CXCL12   | Chemokine (C-X-C motif) ligand 12                                                   |
| 68049  | Hs.607212              | IGFBP5   | Insulin-like growth factor binding protein 5                                        |
| 270710 | Hs.370771              | CDKN1A   | Cyclin-dependent kinase inhibitor 1A (p21, Cip1)                                    |
| 248454 | Hs.93659               | PDIA4    | Protein disulfide isomerase family A, member 4                                      |
| 137254 | Hs.732003              |          | Transcribed locus                                                                   |
| 196115 | Hs.34526               | CXCR6    | Chemokine (C-X-C motif) receptor 6                                                  |
| 145503 | Hs.435051              | CDKN2D   | Cyclin-dependent kinase inhibitor 2D (p19, inhibits CDK4)                           |

|         |                           |          |                                                              |
|---------|---------------------------|----------|--------------------------------------------------------------|
| 564846  | Hs.712543                 | THOC1    | THO complex 1                                                |
| 123474  | Hs.558396                 | SCD      | Stearoyl-CoA desaturase (delta-9-desaturase)                 |
| 756502  | Hs.534331                 | NUDT1    | Nudix (nucleoside diphosphate linked moiety X)-type motif 1  |
| 145383  | Hs.401929                 | DNASE1L1 | Deoxyribonuclease I-like 1                                   |
| 491763  | Hs.126256                 | IL1B     | Interleukin 1, beta                                          |
| 868368  | Hs.437277                 | TMSB4X   | Thymosin beta 4, X-linked                                    |
| 743188  | Hs.654530                 | NUP214   | Nucleoporin 214kDa                                           |
| 435434  | Hs.163867                 | CD14     | CD14 molecule                                                |
| 755599  | Hs.458414                 | IFITM1   | Interferon induced transmembrane protein 1                   |
| 236059  | Hs.86859                  | GRB7     | Growth factor receptor-bound protein 7                       |
| 1031203 | Hs.651453                 | MYCNOS   | MYCN opposite strand/antisense RNA                           |
| 788256  | Hs.270845                 | KIF23    | Kinesin family member 23                                     |
| 742132  | Hs.458485                 | ISG15    | ISG15 ubiquitin-like modifier                                |
| 432564  | Hs.516160                 | SF3B4    | Splicing factor 3b, subunit 4, 49kDa                         |
| 752557  | Hs.520046                 | GPSM3    | G-protein signaling modulator 3                              |
| 841357  | Hs.484782                 | DFFA     | DNA fragmentation factor, 45kDa, alpha polypeptide           |
| 813707  | Hs.413297                 | RGS16    | Regulator of G-protein signaling 16                          |
| 243321  | In multiple<br>ClusterIDs |          |                                                              |
| 142395  | Hs.83634                  | HCFC1    | Host cell factor C1 (VP16-accessory protein)                 |
| 813675  | Hs.37616                  | STRA13   | Stimulated by retinoic acid 13                               |
| 531028  | Hs.530862                 | PRKAG1   | Protein kinase, AMP-activated, gamma 1 non-catalytic subunit |
| 48182   | Hs.696424                 |          | Transcribed locus                                            |
| 292272  | Hs.80720                  | GAB1     | GRB2-associated binding protein 1                            |
| 51737   | Hs.546282                 | RBBP8    | Retinoblastoma binding protein 8                             |
| 127519  | In multiple<br>ClusterIDs |          |                                                              |
| 26578   | Hs.517543                 | PES1     | Pescadillo ribosomal biogenesis factor 1                     |
| 293820  | In multiple<br>ClusterIDs |          |                                                              |
| 48530   | Hs.169182                 | KIF21B   | Kinesin family member 21B                                    |
| 810734  | Hs.523829                 | POLD4    | Polymerase (DNA-directed), delta 4, accessory subunit        |
| 124753  | Hs.94395                  | ABCD4    | ATP-binding cassette, sub-family D (ALD), member 4           |
| 209137  | Hs.22785                  | GABRE    | Gamma-aminobutyric acid (GABA) A receptor, epsilon           |
| 135692  | Hs.319438                 | PLA2G5   | Phospholipase A2, group V                                    |
| 123614  | Hs.574822                 | FAM110A  | Family with sequence similarity 110, member A                |

|         |                        |          |                                                                                   |
|---------|------------------------|----------|-----------------------------------------------------------------------------------|
| 292362  | Hs.659592              |          | Transcribed locus                                                                 |
| 251875  | Hs.659011              |          | Transcribed locus                                                                 |
| 136449  | Hs.35125               | ARHGEF40 | Rho guanine nucleotide exchange factor (GEF) 40                                   |
| 137236  | Hs.508010              | FNDC3A   | Fibronectin type III domain containing 3A                                         |
| 471196  | Hs.111577              | ITM2C    | Integral membrane protein 2C                                                      |
| 110503  | In multiple ClusterIDs |          |                                                                                   |
| 843426  | Hs.642842              | SAV1     | Salvador homolog 1 (Drosophila)                                                   |
| 214916  | Hs.591863              | FZD6     | Frizzled family receptor 6                                                        |
| 212325  | Hs.443169              | HEPACAM2 | HEPACAM family member 2                                                           |
| 140515  | Data not found         |          |                                                                                   |
| 123627  | Hs.580464              | ATP6V1C2 | ATPase, H <sup>+</sup> transporting, lysosomal 42kDa, V1 subunit C2               |
| 110811* | Hs.484099              | KCNMB1   | Potassium large conductance calcium-activated channel, subfamily M, beta member 1 |
| 729912* | Hs.351665              | TRDMT1   | TRNA aspartic acid methyltransferase 1                                            |
| 726779* | Hs.465929              | CNN1     | Calponin 1, basic, smooth muscle                                                  |
| 81289*  | Hs.516105              | ACTG2    | Actin, gamma 2, smooth muscle, enteric                                            |
| 809720  | Hs.516855              | CENPB    | Centromere protein B, 80kDa                                                       |
| 530185  | Hs.595133              | CD83     | CD83 molecule                                                                     |
| 291985  | Hs.302738              | SLC26A2  | Solute carrier family 26 (sulfate transporter), member 2                          |
| 436062  | Hs.476982              | CPOX     | Coproporphyrinogen oxidase                                                        |
| 859586  | Hs.467637              | CDC42    | Cell division cycle 42                                                            |
| 431655  | Hs.166556              | CD37     | CD37 molecule                                                                     |
| 77577   | Hs.220971              | FOSL2    | FOS-like antigen 2                                                                |
| 194006  | Hs.586984              |          | Transcribed locus                                                                 |
| 139641  | Hs.539253              |          | Transcribed locus                                                                 |
| 127843  | Data not found         |          |                                                                                   |
| 788285  | Hs.183713              | EDNRA    | Endothelin receptor type A                                                        |
| 136802  | Data not found         |          |                                                                                   |
| 126338  | Hs.374067              | UBE3B    | Ubiquitin protein ligase E3B                                                      |
| 209518  | Hs.436787              |          | CDNA FLJ25860 fis, clone CBR01771                                                 |
| 199251  | Data not found         |          |                                                                                   |
| 199628  | Hs.572686              |          |                                                                                   |
| 208741  | Hs.658618              |          | Transcribed locus                                                                 |
| 124922  | Hs.172602              |          | ZNF589                                                                            |
| 796197  | Hs.495912              | DMD      | Dystrophin                                                                        |

|         |                           |                 |                                                                                       |
|---------|---------------------------|-----------------|---------------------------------------------------------------------------------------|
| 128753  | Hs.728936                 | CYP17A1-A<br>S1 | CYP17A1 antisense RNA 1                                                               |
| 756629  | Hs.150540                 | LMF2            | Lipase maturation factor 2                                                            |
| 730002  | Hs.436186                 | CAST            | Calpastatin                                                                           |
| 487797  | Hs.348418                 | DR1             | Down-regulator of transcription 1, TBP-binding (negative cofactor 2)                  |
| 46166   | Hs.152096                 | CYP2J2          | Cytochrome P450, family 2, subfamily J, polypeptide 2                                 |
| 322148  | Hs.516874                 | CHGB            | Chromogranin B (secretogranin 1)                                                      |
| 325182  | Hs.464829                 | CDH2            | Cadherin 2, type 1, N-cadherin (neuronal)                                             |
| 742115  | Hs.403436                 | ECI1            | Enoyl-CoA delta isomerase 1                                                           |
| 769857  | Hs.533013                 | CBS             | Cystathionine-beta-synthase                                                           |
| 854338  | Hs.514840                 | CHI3L2          | Chitinase 3-like 2                                                                    |
| 345957  | Hs.518198                 | CSTA            | Cystatin A (stefin A)                                                                 |
| 343987  | Hs.368912                 | DPP4            | Dipeptidyl-peptidase 4                                                                |
| 757873  | Hs.662611                 |                 | Transcribed locus, strongly similar to NP_034001.1 Cdk5r1 gene product [Mus musculus] |
| 223350  | Hs.558314                 | CP              | Ceruloplasmin (ferroxidase)                                                           |
| 745503  | Hs.518249                 | CNBP            | CCHC-type zinc finger, nucleic acid binding protein                                   |
| 271006  | In multiple<br>ClusterIDs |                 |                                                                                       |
| 68950   | Hs.244723                 |                 | CCNE1                                                                                 |
| 2027965 | Hs.534307                 | CCND3           | Cyclin D3                                                                             |
| 2166340 | Hs.106070                 | CDKN1C          | Cyclin-dependent kinase inhibitor 1C (p57, Kip2)                                      |
| 1709032 | Hs.643120                 | IGF1R           | Insulin-like growth factor 1 receptor                                                 |
| 1850392 | Hs.523930                 | TRAF5           | TNF receptor-associated factor 5                                                      |
| 2062620 | Hs.156346                 | TOP2A           | Topoisomerase (DNA) II alpha 170kDa                                                   |
| 1881408 | Hs.656646                 | GTF3C4          | General transcription factor IIIC, polypeptide 4, 90kDa                               |
| 1722714 | Hs.76272                  | KDM5A           | Lysine (K)-specific demethylase 5A                                                    |
| 1855159 | Hs.76206                  | CDH5            | Cadherin 5, type 2 (vascular endothelium)                                             |
| 2067403 | Hs.388116                 | DVL3            | Dishevelled, dsh homolog 3 (Drosophila)                                               |
| 738506  | Hs.196054                 | HDAC9           | Histone deacetylase 9                                                                 |
| 1722884 | Hs.143751                 | MMP11           | Matrix metalloproteinase 11 (stromelysin 3)                                           |
| 1859519 | Hs.371249                 | PTN             | Pleiotrophin                                                                          |
| 2095412 | Hs.645344                 | RPL13AP5        | Ribosomal protein L13a pseudogene 5                                                   |
| 2485436 | Hs.3352                   | HDAC2           | Histone deacetylase 2                                                                 |
| 1731368 | Hs.439726                 | LAMB2           | Laminin, beta 2 (laminin S)                                                           |

|         |                        |          |                                                                       |
|---------|------------------------|----------|-----------------------------------------------------------------------|
| 1891918 | Hs.90073               | CSE1L    | CSE1 chromosome segregation 1-like (yeast)                            |
| 2104626 | Hs.73133               | MT3      | Metallothionein 3                                                     |
| 843158  | Hs.592142              | NCOA3    | Nuclear receptor coactivator 3                                        |
| 509800  | In multiple ClusterIDs |          |                                                                       |
| 625683  | Hs.173162              | EMC8     | ER membrane protein complex subunit 8                                 |
| 951022  | Hs.34780               | DCX      | Doublecortin                                                          |
| 773579  | Hs.303808              | GCFC2    | GC-rich sequence DNA-binding factor 2                                 |
| 328207  | Hs.55481               |          | ZNF165                                                                |
| 839888  | Hs.7768                | FIBP     | Fibroblast growth factor (acidic) intracellular binding protein       |
| 593251  | In multiple ClusterIDs |          |                                                                       |
| 772938  | Hs.55967               | SHOX2    | Short stature homeobox 2                                              |
| 342349  | Hs.404183              | MAP3K14  | Mitogen-activated protein kinase kinase kinase 14                     |
| 505225  | Hs.655143              | SORBS2   | Sorbin and SH3 domain containing 2                                    |
| 271670  | Hs.54673               | TNFSF13  | Tumor necrosis factor (ligand) superfamily, member 13                 |
| 771295  | Hs.529420              | UBE2G2   | Ubiquitin-conjugating enzyme E2G 2                                    |
| 1696513 | Hs.77274               | PLAU     | Plasminogen activator, urokinase                                      |
| 1839392 | Hs.170009              | TGFA     | Transforming growth factor, alpha                                     |
| 2018080 | Hs.159161              | ARHGDI1A | Rho GDP dissociation inhibitor (GDI) alpha                            |
| 2161635 | Hs.118681              | ERBB3    | V-erb-b2 erythroblastic leukemia viral oncogene homolog 3 (avian)     |
| 1705470 | Hs.149239              | EFNB2    | Ephrin-B2                                                             |
| 1844780 | Hs.166015              | FGF6     | Fibroblast growth factor 6                                            |
| 813158  | Hs.78582               | DRG2     | Developmentally regulated GTP binding protein 2                       |
| 275871  | Hs.524599              | NAP1L1   | Nucleosome assembly protein 1-like 1                                  |
| 301849  | Hs.467084              | EIF4G3   | Eukaryotic translation initiation factor 4 gamma, 3                   |
| 199663  | In multiple ClusterIDs |          |                                                                       |
| 770216  | Hs.709218              | EHMT2    | Euchromatic histone-lysine N-methyltransferase 2                      |
| 41591   | Hs.268515              | MN1      | Meningioma (disrupted in balanced translocation) 1                    |
| 950709  | Hs.182255              | NHP2L1   | NHP2 non-histone chromosome protein 2-like 1 ( <i>S. cerevisiae</i> ) |
| 593023  | Hs.307720              | DTNB     | Dystrobrevin, beta                                                    |
| 897575  | Hs.517421              | MED15    | Mediator complex subunit 15                                           |
| 742977  | In multiple ClusterIDs |          |                                                                       |
| 897823  | Hs.707189              |          | Transcribed locus                                                     |

|        |                        |              |                                                                                                                     |
|--------|------------------------|--------------|---------------------------------------------------------------------------------------------------------------------|
| 731051 | Hs.706903              |              | Transcribed locus                                                                                                   |
| 610113 | Hs.713554              | SNX2         | Sorting nexin 2                                                                                                     |
| 266085 | Hs.727344              | KHSRP        | KH-type splicing regulatory protein                                                                                 |
| 52076  | Hs.522484              | OLFM1        | Olfactomedin 1                                                                                                      |
| 810801 | Hs.273330              | AGRN         | Agrin                                                                                                               |
| 509570 | Hs.523045              | CAMK2G       | Calcium/calmodulin-dependent protein kinase II gamma                                                                |
| 784065 | In multiple ClusterIDs |              |                                                                                                                     |
| 767183 | Hs.14601               | HCLS1        | Hematopoietic cell-specific Lyn substrate 1                                                                         |
| 134476 | Hs.24167               | VAMP7        | Vesicle-associated membrane protein 7                                                                               |
| 812251 | Hs.643566              | MAPKAPK2     | Mitogen-activated protein kinase-activated protein kinase 2                                                         |
| 549146 | Hs.501778              | TRIM22       | Tripartite motif containing 22                                                                                      |
| 155287 | Hs.702139              | HSPA1A       | Heat shock 70kDa protein 1A                                                                                         |
| 810891 | Hs.473256              | LAMA5        | Laminin, alpha 5                                                                                                    |
| 21738  | Hs.438289              | HADH         | Hydroxyacyl-CoA dehydrogenase                                                                                       |
| 810813 | Hs.516484              | S100A2       | S100 calcium binding protein A2                                                                                     |
| 212640 | Hs.701324              | ARHGAP4      | Rho GTPase activating protein 4                                                                                     |
| 212078 | Hs.644352              | <i>ITGA1</i> | integrin, alpha 1                                                                                                   |
| 754046 | Hs.444619              | LAGE3        | L antigen family, member 3                                                                                          |
| 742101 | Hs.469728              | PAX8         | Paired box 8                                                                                                        |
| 823901 | Hs.202470              | UVRAG        | UV radiation resistance associated                                                                                  |
| 138116 | Hs.334868              | PPP2R5E      | Protein phosphatase 2, regulatory subunit B', epsilon isoform                                                       |
| 154749 | Hs.524081              | DPAGT1       | Dolichyl-phosphate (UDP-N-acetylglucosamine)<br>N-acetylglucosaminephosphotransferase 1 (GlcNAc-1-P<br>transferase) |
| 511066 | Hs.253726              | PAPOLA       | Poly(A) polymerase alpha                                                                                            |
| 295729 | Hs.18426               | HRSP12       | Heat-responsive protein 12                                                                                          |
| 810791 | Hs.509523              | MNAT1        | Menage a trois homolog 1, cyclin H assembly factor ( <i>Xenopus laevis</i> )                                        |
| 267634 | Hs.159130              | RAF1         | V-raf-1 murine leukemia viral oncogene homolog 1                                                                    |
| 110788 | Hs.56729               | LSP1         | Lymphocyte-specific protein 1                                                                                       |
| 758365 | Hs.524530              | CTDSP2       | CTD (carboxy-terminal domain, RNA polymerase II,<br>polypeptide A) small phosphatase 2                              |
| 787938 | Hs.5462                | SLC4A4       | Solute carrier family 4, sodium bicarbonate cotransporter,<br>member 4                                              |
| 760148 | Hs.78601               | UROD         | Uroporphyrinogen decarboxylase                                                                                      |
| 115281 | Hs.631567              | CD79A        | CD79a molecule, immunoglobulin-associated alpha                                                                     |

|         |                           |              |                                                                        |
|---------|---------------------------|--------------|------------------------------------------------------------------------|
| 788421  | Hs.75862                  | SMAD4        | SMAD family member 4                                                   |
| 199180  | Hs.440967                 | PON3         | Paraoxonase 3                                                          |
| 191664  | Hs.371147                 | THBS2        | Thrombospondin 2                                                       |
| 242578  | Hs.524399                 | TROAP        | Trophinin associated protein                                           |
| 842939  | Hs.474018                 | ADARB1       | Adenosine deaminase, RNA-specific, B1                                  |
| 841282  | Hs.658169                 | SFRP4        | Secreted frizzled-related protein 4                                    |
| 530139  | Hs.710481                 |              | Transcribed locus                                                      |
| 759173  | Hs.296049                 | <i>MFAP4</i> | Microfibrillar-associated protein 4                                    |
| 743804  | Hs.369373                 | SEC23B       | Sec23 homolog B ( <i>S. cerevisiae</i> )                               |
| 283436  | Hs.132858                 | RAP1GDS1     | RAP1, GTP-GDP dissociation stimulator 1                                |
| 428412  | Hs.277937                 | GZMK         | Granzyme K (granzyme 3; tryptase II)                                   |
| 878406  | Hs.490874                 | MTX1         | Metaxin 1                                                              |
| 783836  | Hs.196482                 | JDP2         | Jun dimerization protein 2                                             |
| 85805   | Hs.50223                  | RBP4         | Retinol binding protein 4, plasma                                      |
| 788486  | Hs.444389                 | ENTPD4       | Ectonucleoside triphosphate diphosphohydrolase 4                       |
| 83120   | Hs.401509                 | RBM10        | RNA binding motif protein 10                                           |
| 193913  | In multiple<br>ClusterIDs |              |                                                                        |
| 824340  | Hs.648940                 | NCF1C        | Neutrophil cytosolic factor 1C pseudogene                              |
| 240505  | Hs.643552                 |              | SDR39U1                                                                |
| 632137  | Hs.112058                 | SIVA1        | SIVA1, apoptosis-inducing factor                                       |
| 258589  | Hs.631886                 | REL          | V-rel reticuloendotheliosis viral oncogene homolog (avian)             |
| 80109   | In multiple<br>ClusterIDs |              |                                                                        |
| 510760  | Hs.478868                 | KIAA0226     | KIAA0226                                                               |
| 841695  | Hs.732118                 | N4BP2L1      | NEDD4 binding protein 2-like 1                                         |
| 731273  | Hs.115460                 | CCIN         | Calicin                                                                |
| 277186  | Hs.372295                 | PITPNM1      | Phosphatidylinositol transfer protein, membrane-associated 1           |
| 882511  | Hs.277721                 | NBR1         | Neighbor of BRCA1 gene 1                                               |
| 362409  | Hs.420036                 | GAD1         | Glutamate decarboxylase 1 (brain, 67kDa)                               |
| 1031747 | Hs.94542                  | ALKBH1       | AlkB, alkylation repair homolog 1 ( <i>E. coli</i> )                   |
| 264556  | Hs.471119                 | BMPR2        | Bone morphogenetic protein receptor, type II (serine/threonine kinase) |
| 858153  | Hs.79334                  | NFIL3        | Nuclear factor, interleukin 3 regulated                                |
| 586888  | Hs.77100                  | GTF2E2       | General transcription factor IIE, polypeptide 2, beta 34kDa            |
| 856174  | Hs.149032                 | PIK3R4       | Phosphoinositide-3-kinase, regulatory subunit 4                        |



|         |                        |         |                                                                                                      |
|---------|------------------------|---------|------------------------------------------------------------------------------------------------------|
| 460106  | Hs.486357              | SMPDL3A | Sphingomyelin phosphodiesterase, acid-like 3A                                                        |
| 877832  | Hs.522817              | BCAP31  | B-cell receptor-associated protein 31                                                                |
| 288663  | Hs.333303              | GJB1    | Gap junction protein, beta 1, 32kDa                                                                  |
| 148225  | Hs.170986              | GALNT3  | UDP-N-acetyl-alpha-D-galactosamine:polypeptide<br>N-acetylgalactosaminyltransferase 3 (GalNAc-T3)    |
| 271045  | Hs.162233              | CHD4    | Chromodomain helicase DNA binding protein 4                                                          |
| 40773   | Hs.584760              | GNAZ    | Guanine nucleotide binding protein (G protein), alpha z<br>polypeptide                               |
| 34140   | Hs.377894              | GCA     | Grancalcin, EF-hand calcium binding protein                                                          |
| 586895  | In multiple ClusterIDs |         |                                                                                                      |
| 1049330 | Hs.183428              | SSPN    | Sarcospan                                                                                            |
| 811678  | In multiple ClusterIDs |         |                                                                                                      |
| 1071516 | Hs.1407                | EDN2    | Endothelin 2                                                                                         |
| 592551  | Hs.435714              | PAK1    | P21 protein (Cdc42/Rac)-activated kinase 1                                                           |
| 756565  | Hs.17631               | FZD5    | Frizzled family receptor 5                                                                           |
| 826722  | Hs.530595              | STAT2   | Signal transducer and activator of transcription 2, 113kDa                                           |
| 1168508 | Hs.1048                | KITLG   | KIT ligand                                                                                           |
| 612577  | Hs.329502              | CASP9   | Caspase 9, apoptosis-related cysteine peptidase                                                      |
| 766876  | Hs.375129              | MMP3    | Matrix metalloproteinase 3 (stromelysin 1, progelatinase)                                            |
| 842971  | Hs.412597              | DSG2    | Desmoglein 2                                                                                         |
| 1467351 | Hs.567319              | POLA1   | Polymerase (DNA directed), alpha 1, catalytic subunit                                                |
| 645774  | In multiple ClusterIDs |         |                                                                                                      |
| 767295  | Hs.187898              | NF2     | Neurofibromin 2 (merlin)                                                                             |
| 843225  | In multiple ClusterIDs |         |                                                                                                      |
| 1473758 | Hs.1722                | IL1A    | Interleukin 1, alpha                                                                                 |
| 646846  | Hs.385870              | TDGF1   | Teratocarcinoma-derived growth factor 1                                                              |
| 770862  | Hs.732095              | VEGFB   | Vascular endothelial growth factor B                                                                 |
| 855521  | Hs.406013              | KRT18   | Keratin 18                                                                                           |
| 1523103 | Hs.633509              | RAD50   | RAD50 homolog ( <i>S. cerevisiae</i> )                                                               |
| 877782  | Hs.733575              |         | Transcribed locus, strongly similar to NP_599193.1 Rac1 gene<br>product [ <i>Rattus norvegicus</i> ] |
| 624634  | Hs.744                 | FDX1    | Ferredoxin 1                                                                                         |
| 246430  | Hs.285887              | UGT2B4  | UDP glucuronosyltransferase 2 family, polypeptide B4                                                 |
| 844725  | Hs.368214              | TTC3    | Tetratricopeptide repeat domain 3                                                                    |
| 590640  | Hs.284491              | PDXK    | Pyridoxal (pyridoxine, vitamin B6) kinase                                                            |
| 52996   | Hs.516370              | CHST10  | Carbohydrate sulfotransferase 10                                                                     |

|         |                        |          |                                                                                               |
|---------|------------------------|----------|-----------------------------------------------------------------------------------------------|
| 742576  | Hs.559506              |          | SPAG11A                                                                                       |
| 627251  | Hs.532315              | SLC31A1  | Solute carrier family 31 (copper transporters), member 1                                      |
| 358643  | Hs.23111               | FARSA    | Phenylalanyl-tRNA synthetase, alpha subunit                                                   |
| 50491   | Hs.13261               | BAI3     | Brain-specific angiogenesis inhibitor 3                                                       |
| 627273  | Hs.239818              | PIK3CB   | Phosphatidylinositol-4,5-bisphosphate 3-kinase, catalytic subunit beta                        |
| 151595  | Data not found         |          |                                                                                               |
| 590369  | Hs.414795              | SERPINE1 | Serpin peptidase inhibitor, clade E (nexin, plasminogen activator inhibitor type 1), member 1 |
| 754500  | Hs.135087              | IL6R     | Interleukin 6 receptor                                                                        |
| 810142  | In multiple ClusterIDs |          |                                                                                               |
| 1035639 | Hs.679430              | CDKL1    | Cyclin-dependent kinase-like 1 (CDC2-related kinase)                                          |
| 592111  | Hs.700779              |          | KRT6A                                                                                         |
| 755750  | Hs.463456              | NME2     | NME/NM23 nucleoside diphosphate kinase 2                                                      |
| 42118   | Hs.321709              | P2RX4    | Purinergic receptor P2X, ligand-gated ion channel, 4                                          |
| 202904  | Hs.309090              | SRSF7    | Serine/arginine-rich splicing factor 7                                                        |
| 306771  | In multiple ClusterIDs |          |                                                                                               |
| 380394  | Hs.461178              | EIF1AY   | Eukaryotic translation initiation factor 1A, Y-linked                                         |
| 377152  | Hs.528222              | NDUFS4   | NADH dehydrogenase (ubiquinone) Fe-S protein 4, 18kDa (NADH-coenzyme Q reductase)             |
| 358850  | Hs.74137               | TMED10   | Transmembrane emp24-like trafficking protein 10 (yeast)                                       |
| 856135  | Hs.443861              | SRPK1    | SRSF protein kinase 1                                                                         |
| 45284   | Hs.656905              | LNPEP    | Leucyl/cystinyl aminopeptidase                                                                |
| 70245   | Hs.459211              | AKAP13   | A kinase (PRKA) anchor protein 13                                                             |
| 950507  | Hs.503886              | ZW10     | Zw10 kinetochore protein                                                                      |
| 271899  | Hs.35433               | CDC42BPA | CDC42 binding protein kinase alpha (DMPK-like)                                                |
| 491565  | Hs.82071               | CITED2   | Cbp/p300-interacting transactivator, with Glu/Asp-rich carboxy-terminal domain, 2             |
| 67769   | Hs.645288              | KCNK3    | Potassium channel, subfamily K, member 3                                                      |
| 276237  | Hs.592313              | ARHGAP5  | Rho GTPase activating protein 5                                                               |
| 358433  | Hs.26550               | RXRG     | Retinoid X receptor, gamma                                                                    |
| 756931  | Hs.515715              | S100A1   | S100 calcium binding protein A1                                                               |
| 79782   | Hs.463569              | VEZF1    | Vascular endothelial zinc finger 1                                                            |
| 266146  | In multiple            |          |                                                                                               |

|         |                        |         |                                                                                         |
|---------|------------------------|---------|-----------------------------------------------------------------------------------------|
|         | ClusterIDs             |         |                                                                                         |
| 124781  | Hs.71465               | SQLE    | Squalene epoxidase                                                                      |
| 165878  | Hs.171311              | ITGA8   | Integrin, alpha 8                                                                       |
| 470930  | In multiple ClusterIDs |         |                                                                                         |
| 30502   | Hs.379912              | DLL1    | Delta-like 1 (Drosophila)                                                               |
| 131653  | Hs.411125              | MRPS12  | Mitochondrial ribosomal protein S12                                                     |
| 165857  | Hs.531403              | INPP4B  | Inositol polyphosphate-4-phosphatase, type II, 105kDa                                   |
| 128530  | Hs.46701               | SNTB1   | Syntrophin, beta 1 (dystrophin-associated protein A1, 59kDa, basic component 1)         |
| 811842  | Hs.237825              | SRP72   | Signal recognition particle 72kDa                                                       |
| 752652  | Hs.593995              | TCF7L2  | Transcription factor 7-like 2 (T-cell specific, HMG-box)                                |
| 810391  | Hs.75619               | HYAL1   | Hyaluronoglucosaminidase 1                                                              |
| 209841  | Hs.432862              | Mar-06  | Membrane-associated ring finger (C3HC4) 6, E3 ubiquitin protein ligase                  |
| 262996  | Hs.718669              |         | Transcribed locus                                                                       |
| 232933  | Hs.443161              | DPYS    | Dihydropyrimidinase                                                                     |
| 359395  | Hs.464622              | NAPG    | N-ethylmaleimide-sensitive factor attachment protein, gamma                             |
| 281978  | Hs.45002               | RAC3    | Ras-related C3 botulinum toxin substrate 3 (rho family, small GTP binding protein Rac3) |
| 203351  | In multiple ClusterIDs |         |                                                                                         |
| 123730  | Hs.316931              | SKAP1   | Src kinase associated phosphoprotein 1                                                  |
| 129644  | Hs.508148              | ABI1    | Abl-interactor 1                                                                        |
| 713129  | Hs.90708               | GZMA    | Granzyme A (granzyme 1, cytotoxic T-lymphocyte-associated serine esterase 3)            |
| 971367  | Hs.512675              | RPS8    | Ribosomal protein S8                                                                    |
| 809910  | Hs.374650              | IFITM3  | Interferon induced transmembrane protein 3                                              |
| 1893775 | Hs.654541              | BGLAP   | Bone gamma-carboxyglutamate (gla) protein                                               |
| 825287  | Hs.333791              | TNFSF11 | Tumor necrosis factor (ligand) superfamily, member 11                                   |
| 293924  | Hs.154495              | ACHE    | Acetylcholinesterase                                                                    |
| 754649  | Hs.204041              | AHSA1   | AHA1, activator of heat shock 90kDa protein ATPase homolog 1 (yeast)                    |
| 754406  | Hs.172631              | ITGAM   | Integrin, alpha M (complement component 3 receptor 3 subunit)                           |
| 280371  | Hs.149037              | HTR2C   | 5-hydroxytryptamine (serotonin) receptor 2C, G protein-coupled                          |

|         |                        |         |                                                                                                                |
|---------|------------------------|---------|----------------------------------------------------------------------------------------------------------------|
| 1404396 | Data not found         |         |                                                                                                                |
| 1468820 | Hs.647092              | NOS3    | Nitric oxide synthase 3 (endothelial cell)                                                                     |
| 843387  | Hs.329502              | CASP9   | Caspase 9, apoptosis-related cysteine peptidase                                                                |
| 346604  | Hs.534342              | AGER    | Advanced glycosylation end product-specific receptor                                                           |
| 52741   | Hs.26630               | ABCA3   | ATP-binding cassette, sub-family A (ABC1), member 3                                                            |
| 252663  | Hs.65425               | CALB1   | Calbindin 1, 28kDa                                                                                             |
| 841221  | Hs.632015              | ASL     | Argininosuccinate lyase                                                                                        |
| 562813  | Hs.89570               | AMPD1   | Adenosine monophosphate deaminase 1                                                                            |
| 825312  | Hs.246310              | ATP5J   | ATP synthase, H <sup>+</sup> transporting, mitochondrial Fo complex, subunit F6                                |
| 741880  | Hs.557097              | PBX1    | Pre-B-cell leukemia homeobox 1                                                                                 |
| 884743  | Hs.653202              | ARF5    | ADP-ribosylation factor 5                                                                                      |
| 489485  | Hs.277704              | HYOU1   | Hypoxia up-regulated 1                                                                                         |
| 141768  | Hs.446352              | ERBB2   | V-erb-b2 erythroblastic leukemia viral oncogene homolog 2, neuro/glioblastoma derived oncogene homolog (avian) |
| 855391  | Hs.516807              | STK25   | Serine/threonine kinase 25                                                                                     |
| 744940  | Hs.98243               | SPINK2  | Serine peptidase inhibitor, Kazal type 2 (acrosin-trypsin inhibitor)                                           |
| 504682  | Hs.279837              | GSTM2   | Glutathione S-transferase mu 2 (muscle)                                                                        |
| 701412  | In multiple ClusterIDs |         |                                                                                                                |
| 684879  | In multiple ClusterIDs |         |                                                                                                                |
| 868308  | Hs.527193              | RPS23   | Ribosomal protein S23                                                                                          |
| 32493   | Hs.133397              | ITGA6   | Integrin, alpha 6                                                                                              |
| 663931  | Hs.523852              | CCND1   | Cyclin D1                                                                                                      |
| 428103  | Hs.132448              | CD1C    | CD1c molecule                                                                                                  |
| 40692   | Hs.22584               | PDYN    | Prodynorphin                                                                                                   |
| 491727  | Hs.284255              |         | ALPP                                                                                                           |
| 756549  | Hs.1437                | GAA     | Glucosidase, alpha; acid                                                                                       |
| 455121  | Hs.429666              | CEBPG   | CCAAT/enhancer binding protein (C/EBP), gamma                                                                  |
| 298268  | Hs.255935              | BTG1    | B-cell translocation gene 1, anti-proliferative                                                                |
| 814798  | In multiple ClusterIDs |         |                                                                                                                |
| 49318   | Hs.590970              | AXL     | AXL receptor tyrosine kinase                                                                                   |
| 586706  | Hs.709196              | CEACAM5 | Carcinoembryonic antigen-related cell adhesion molecule 5                                                      |
| 724831  | Hs.647051              | BCL7B   | B-cell CLL/lymphoma 7B                                                                                         |

|         |                |          |                                                                                  |
|---------|----------------|----------|----------------------------------------------------------------------------------|
| 855624  | Hs.76392       | ALDH1A1  | Aldehyde dehydrogenase 1 family, member A1                                       |
| 897950  | Hs.291196      | ATP1B1   | ATPase, Na <sup>+</sup> /K <sup>+</sup> transporting, beta 1 polypeptide         |
| 854760  | Hs.280342      | PRKAR1A  | Protein kinase, cAMP-dependent, regulatory, type I, alpha                        |
| 360778  | Hs.367437      |          | ATM                                                                              |
| 854879  | Hs.528006      | SPHK2    | Sphingosine kinase 2                                                             |
| 384078  | Hs.106876      | ATP6V0D1 | ATPase, H <sup>+</sup> transporting, lysosomal 38kDa, V0 subunit d1              |
| 49560   | Hs.502842      | CAPN1    | Calpain 1, (mu/I) large subunit                                                  |
| 183440  | Hs.88251       | ARSA     | Arylsulfatase A                                                                  |
| 993505  | Hs.368325      | SUPT3H   | Suppressor of Ty 3 homolog (S. cerevisiae)                                       |
| 1473929 | Hs.105636      | ETV3     | Ets variant 3                                                                    |
| 796966  | Hs.462998      | IGFBP4   | Insulin-like growth factor binding protein 4                                     |
| 2161427 | Hs.32405       | PGR      | Progesterone receptor                                                            |
| 781959  | Hs.744902      | PHC1     | Polyhomeotic homolog 1 (Drosophila)                                              |
| 2187900 | Hs.66196       | NTHL1    | Nth endonuclease III-like 1 (E. coli)                                            |
| 2534993 | Hs.376208      | LTB      | Lymphotoxin beta (TNF superfamily, member 3)                                     |
| 2387733 | Hs.744273      | FAIM3    | Fas apoptotic inhibitory molecule 3                                              |
| 2522844 | Hs.502872      | MAP3K11  | Mitogen-activated protein kinase kinase kinase 11                                |
| 2244482 | Hs.102914      | CUL4B    | Cullin 4B                                                                        |
| 811810  | Hs.270621      |          | TAF5L                                                                            |
| 326252  | Hs.112444      | TAF11    | TAF11 RNA polymerase II, TATA box binding protein (TBP)-associated factor, 28kDa |
| 754650  | Hs.178023      | MYF5     | Myogenic factor 5                                                                |
| 2531717 | Hs.567499      | WT1-AS   | WT1 antisense RNA                                                                |
| 1939252 | Hs.134623      | RNF7     | Ring finger protein 7                                                            |
| 796105  | Hs.158237      | ITGA10   | Integrin, alpha 10                                                               |
| 758645  | Hs.144309      | PCGF3    | Polycomb group ring finger 3                                                     |
| 2310644 | Hs.339735      | CUL4A    | Cullin 4A                                                                        |
| 531862  | Hs.251531      | PSMA4    | Proteasome (prosome, macropain) subunit, alpha type, 4                           |
| 626967  | Hs.37009       | ALPI     | Alkaline phosphatase, intestinal                                                 |
| 823718  | Hs.100322      | CA6      | Carbonic anhydrase VI                                                            |
| 1456424 | Hs.103502      | GPT      | Glutamic-pyruvate transaminase (alanine aminotransferase)                        |
| 265645  | Data not found |          |                                                                                  |
| 796613  | Hs.705959      |          | Transcribed locus                                                                |
| 1456419 | Hs.435615      | CASR     | Calcium-sensing receptor                                                         |
| 73609   | Hs.507348      | HS3ST1   | Heparan sulfate (glucosamine) 3-O-sulfotransferase 1                             |
| 811013  | Hs.82927       | AMPD2    | Adenosine monophosphate deaminase 2                                              |

|         |                        |          |                                                                        |
|---------|------------------------|----------|------------------------------------------------------------------------|
| 1411726 | Hs.153177              | RPS28    | Ribosomal protein S28                                                  |
| 1456120 | Hs.524625              | GRK5     | G protein-coupled receptor kinase 5                                    |
| 683811  | Hs.367437              | ATM      | Ataxia telangiectasia mutated                                          |
| 1544051 | Hs.281902              | SUGT1    | SGT1, suppressor of G2 allele of SKP1 ( <i>S. cerevisiae</i> )         |
| 2534994 | Hs.130031              | TRIO     | Trio Rho guanine nucleotide exchange factor                            |
| 2149016 | Hs.524871              | POLE     | Polymerase (DNA directed), epsilon, catalytic subunit                  |
| 813810  | In multiple ClusterIDs |          |                                                                        |
| 2516859 | Hs.500066              | TADA2A   | Transcriptional adaptor 2A                                             |
| 214990  | Hs.522373              | GSN      | Gelsolin                                                               |
| 66728   | Hs.365365              | FECH     | Ferrochelatase                                                         |
| 144834  | In multiple ClusterIDs |          |                                                                        |
| 381812  | Hs.128848              | GRIK3    | Glutamate receptor, ionotropic, kainate 3                              |
| 562927  | Hs.471779              | LRRFIP1  | Leucine rich repeat (in FLII) interacting protein 1                    |
| 813757  | Hs.433159              | FOLR2    | Folate receptor 2 (fetal)                                              |
| 758343  | Hs.381072              | PPIF     | Peptidylprolyl isomerase F                                             |
| 28774   | Hs.446083              | PTPRD    | Protein tyrosine phosphatase, receptor type, D                         |
| 768064  | Hs.72912               | CYP1A1   | Cytochrome P450, family 1, subfamily A, polypeptide 1                  |
| 1323432 | Hs.460960              | IDS      | Iduronate 2-sulfatase                                                  |
| 795254  | In multiple ClusterIDs |          |                                                                        |
| 307873  | Hs.343522              | ATP2B4   | ATPase, Ca <sup>++</sup> transporting, plasma membrane 4               |
| 738900  | Hs.144941              | LRRC41   | Leucine rich repeat containing 41                                      |
| 1323203 | Hs.295917              | ATP6V1B2 | ATPase, H <sup>+</sup> transporting, lysosomal 56/58kDa, V1 subunit B2 |
| 244194  | Data not found         |          |                                                                        |
| 549139  | Hs.528631              | ARSD     | Arylsulfatase D                                                        |
| 813637  | Hs.567259              | DNAH9    | Dynein, axonemal, heavy chain 9                                        |
| 1323448 | Hs.70327               | CRIP1    | Cysteine-rich protein 1 (intestinal)                                   |
| 770868  | Hs.159223              | NAB2     | NGFI-A binding protein 2 (EGR1 binding protein 2)                      |
| 296757  | Hs.434973              | GYPA     | Glycophorin A (MNS blood group)                                        |
| 153340  | Hs.75765               | CXCL2    | Chemokine (C-X-C motif) ligand 2                                       |
| 197525  | Hs.642706              | FMO5     | Flavin containing monooxygenase 5                                      |
| 77897   | Hs.567297              | KHK      | Ketohexokinase (fructokinase)                                          |
| 45632   | Hs.386225              | GYS1     | Glycogen synthase 1 (muscle)                                           |
| 134748  | Hs.546256              | GCSH     | Glycine cleavage system protein H (aminomethyl carrier)                |
| 811162  | Hs.519168              | FMOD     | Fibromodulin                                                           |
| 112629  | Hs.102788              | MAN1A1   | Mannosidase, alpha, class 1A, member 1                                 |

|        |                        |           |                                                                     |
|--------|------------------------|-----------|---------------------------------------------------------------------|
| 136235 | Hs.523836              | GSTP1     | Glutathione S-transferase pi 1                                      |
| 203721 | Hs.654465              | GCLC      | Glutamate-cysteine ligase, catalytic subunit                        |
| 809464 | Hs.533683              | FGFR2     | Fibroblast growth factor receptor 2                                 |
| 810986 | Hs.82887               | PPP1R11   | Protein phosphatase 1, regulatory (inhibitor) subunit 11            |
| 823928 | In multiple ClusterIDs |           |                                                                     |
| 753467 | Hs.419240              | SLC2A3    | Solute carrier family 2 (facilitated glucose transporter), member 3 |
| 121722 | Hs.519294              | FBN2      | Fibrillin 2                                                         |
| 50506  | Hs.411847              | MAPK6     | Mitogen-activated protein kinase 6                                  |
| 137940 | Hs.2006                | GSTM3     | Glutathione S-transferase mu 3 (brain)                              |
| 172440 | Hs.503222              | RAB6A     | RAB6A, member RAS oncogene family                                   |
| 951117 | Hs.741179              | SHMT2     | Serine hydroxymethyltransferase 2 (mitochondrial)                   |
| 785744 | Hs.494538              | PTCH      | Patched homolog (Drosophila)                                        |
| 589751 | Hs.90753               | HTATIP2   | HIV-1 Tat interactive protein 2, 30kDa                              |
| 950710 | Hs.80741               | PCCA      | Propionyl CoA carboxylase, alpha polypeptide                        |
| 797059 | Hs.732006              |           | Transcribed locus                                                   |
| 594743 | Hs.491148              | PCM1      | Pericentriolar material 1                                           |
| 840158 | Hs.716502              |           | Transcribed locus                                                   |
| 730410 | Hs.470627              | LCK       | Lymphocyte-specific protein tyrosine kinase                         |
| 814119 | Hs.463105              | DHX8      | DEAH (Asp-Glu-Ala-His) box polypeptide 8                            |
| 146577 | Hs.435001              | KLF10     | Kruppel-like factor 10                                              |
| 814526 | Hs.236361              | RBM38     | RNA binding motif protein 38                                        |
| 878838 | Hs.590575              | GRM3      | Glutamate receptor, metabotropic 3                                  |
| 868380 | Hs.352642              | FCGR2A    | Fc fragment of IgG, low affinity IIa, receptor (CD32)               |
| 289570 | Hs.372000              | NSMAF     | Neutral sphingomyelinase (N-SMase) activation associated factor     |
| 430427 | Hs.471991              | MTF1      | Metal-regulatory transcription factor 1                             |
| 49987  | Hs.32763               | GRIA2     | Glutamate receptor, ionotropic, AMPA 2                              |
| 68557  | Hs.380135              | FABP1     | Fatty acid binding protein 1, liver                                 |
| 305606 | Hs.89839               | EPHA1     | EPH receptor A1                                                     |
| 897880 | Hs.421509              | CCT4      | Chaperonin containing TCP1, subunit 4 (delta)                       |
| 130843 | Hs.558180              |           | MAPK8IP2                                                            |
| 788185 | Hs.521456              | TNFRSF10B | Tumor necrosis factor receptor superfamily, member 10b              |
| 109179 | Hs.514276              | SP2       | Sp2 transcription factor                                            |
| 66560  | Hs.625768              | CKAP2     | Cytoskeleton associated protein 2                                   |
| 85394  | Hs.405156              | PPAP2B    | Phosphatidic acid phosphatase type 2B                               |

|         |                        |          |                                                             |
|---------|------------------------|----------|-------------------------------------------------------------|
| 745347  | Hs.459940              | LITAF    | Lipopolysaccharide-induced TNF factor                       |
| 711826  | Hs.498661              | USP6NL   | USP6 N-terminal like                                        |
| 843121  | Hs.414565              | CLIC1    | Chloride intracellular channel 1                            |
| 632074  | In multiple ClusterIDs |          |                                                             |
| 48285   | Hs.554791              | TP53I11  | Tumor protein p53 inducible protein 11                      |
| 24918   | Hs.534371              | PIP5K1B  | Phosphatidylinositol-4-phosphate 5-kinase, type I, beta     |
| 884539  | Hs.224137              | C9orf114 | Chromosome 9 open reading frame 114                         |
| 884655  | Hs.404321              | GARS     | Glycyl-tRNA synthetase                                      |
| 842825  | Hs.528780              | GSPT1    | G1 to S phase transition 1                                  |
| 362910  | Hs.515860              | MAPRE3   | Microtubule-associated protein, RP/EB family, member 3      |
| 470261  | In multiple ClusterIDs |          |                                                             |
| 810999  | Hs.76686               | GPX1     | Glutathione peroxidase 1                                    |
| 255333  | Hs.32959               | GRK4     | G protein-coupled receptor kinase 4                         |
| 131091  | Hs.478481              | ALG3     | ALG3, alpha-1,3- mannosyltransferase                        |
| 192271  | Hs.631566              | SYT5     | Synaptotagmin V                                             |
| 277507  | Hs.75652               | GSTM5    | Glutathione S-transferase mu 5                              |
| 279790  | In multiple ClusterIDs |          |                                                             |
| 259842  | Hs.184211              |          | PMPCB                                                       |
| 361239  | Hs.188553              | RBBP6    | Retinoblastoma binding protein 6                            |
| 41195   | Hs.532699              | GCDH     | Glutaryl-CoA dehydrogenase                                  |
| 365515  | Hs.567268              | FGF7     | Fibroblast growth factor 7                                  |
| 41648   | Hs.336046              | IL13RA2  | Interleukin 13 receptor, alpha 2                            |
| 418129  | Hs.325978              |          | NUMA1                                                       |
| 884644  | Hs.449909              | RPSA     | Ribosomal protein SA                                        |
| 1574734 | Hs.142912              | FZD2     | Frizzled family receptor 2                                  |
| 701492  | Hs.445758              | E2F5     | E2F transcription factor 5, p130-binding                    |
| 784866  | Hs.99171               | NTF3     | Neurotrophin 3                                              |
| 937020  | Hs.591016              | CRADD    | CASP2 and RIPK1 domain containing adaptor with death domain |
| 1588791 | Hs.501522              | MGMT     | O-6-methylguanine-DNA methyltransferase                     |
| 727246  | Hs.412707              | HPRT1    | Hypoxanthine phosphoribosyltransferase 1                    |
| 795325  | In multiple ClusterIDs |          |                                                             |
| 978834  | Hs.490415              | ZYX      | Zyxin                                                       |
| 1602843 | Hs.247077              | RHOA     | Ras homolog family member A                                 |



|         |                        |          |                                                                                          |
|---------|------------------------|----------|------------------------------------------------------------------------------------------|
| 742536  | Hs.390250              | FGF12    | Fibroblast growth factor 12                                                              |
| 796724  | Hs.37055               | FGF5     | Fibroblast growth factor 5                                                               |
| 1016755 | Hs.164060              | GRB10    | Growth factor receptor-bound protein 10                                                  |
| 1625688 | Hs.336916              | DAXX     | Death-domain associated protein                                                          |
| 744917  | Hs.494457              | NINJ1    | Ninjurin 1                                                                               |
| 809393  | Hs.497492              | MDM4     | Mdm4 p53 binding protein homolog (mouse)                                                 |
| 1032431 | Hs.472497              | BMP8A    | Bone morphogenetic protein 8a                                                            |
| 1631492 | Hs.506415              | CDK17    | Cyclin-dependent kinase 17                                                               |
| 146868  | Hs.502872              | MAP3K11  | Mitogen-activated protein kinase kinase kinase 11                                        |
| 51083   | Hs.314543              | CTNND2   | Catenin (cadherin-associated protein), delta 2                                           |
| 841070  | Hs.213264              | YARS     | Tyrosyl-tRNA synthetase                                                                  |
| 838612  | Hs.118354              | PRR3     | Proline rich 3                                                                           |
| 238821  | Hs.584823              | PLA2G7   | Phospholipase A2, group VII (platelet-activating factor acetylhydrolase, plasma)         |
| 84713   | Hs.300774              |          | FGB                                                                                      |
| 80338   | Hs.632460              | SELENBP1 | Selenium binding protein 1                                                               |
| 856961  | Hs.405590              | EIF3E    | Eukaryotic translation initiation factor 3, subunit E                                    |
| 270626  | Hs.696032              |          | PPARD                                                                                    |
| 41345   | Hs.205627              | RLF      | Rearranged L-myc fusion                                                                  |
| 837904  | In multiple ClusterIDs |          |                                                                                          |
| 884500  | Hs.183958              | PPID     | Peptidylprolyl isomerase D                                                               |
| 666084  | In multiple ClusterIDs |          |                                                                                          |
| 773845  | Hs.266902              | NTF4     | Neurotrophin 4                                                                           |
| 877782  | Hs.733575              |          | Transcribed locus, strongly similar to NP_599193.1 Rac1 gene product [Rattus norvegicus] |
| 1540499 | Hs.162025              | DCC      | Deleted in colorectal carcinoma                                                          |
| 685783  | Hs.475055              | BIK      | BCL2-interacting killer (apoptosis-inducing)                                             |
| 782835  | Hs.370666              | FOXO1    | Forkhead box O1                                                                          |
| 813714  | Hs.390736              | CFLAR    | CASP8 and FADD-like apoptosis regulator                                                  |
| 23185   | Hs.143250              | TNC      | Tenascin C                                                                               |
| 754479  | In multiple ClusterIDs |          |                                                                                          |
| 366154  | In multiple ClusterIDs |          |                                                                                          |
| 321708  | Hs.79353               | TFDP1    | Transcription factor Dp-1                                                                |
| 327350  | In multiple            |          |                                                                                          |

|        |                        |          |                                                                                                                         |
|--------|------------------------|----------|-------------------------------------------------------------------------------------------------------------------------|
|        | ClusterIDs             |          |                                                                                                                         |
| 809946 | Hs.743323              | IFRD2    | Interferon-related developmental regulator 2                                                                            |
| 80162  | Hs.412587              | RAD51C   | RAD51 homolog C ( <i>S. cerevisiae</i> )                                                                                |
| 845363 | Hs.463456              | NME2     | NME/NM23 nucleoside diphosphate kinase 2                                                                                |
| 416316 | Hs.409965              | PNN      | Pinin, desmosome associated protein                                                                                     |
| 460673 | Hs.523687              | CLP1     | Cleavage and polyadenylation factor I subunit 1                                                                         |
| 47037  | Hs.532316              | DBC1     | Deleted in bladder cancer 1                                                                                             |
| 629896 | Hs.335079              | MAP1B    | Microtubule-associated protein 1B                                                                                       |
| 131626 | Hs.530539              | NFRKB    | Nuclear factor related to kappaB binding protein                                                                        |
| 250069 | Hs.41688               | DUSP8    | Dual specificity phosphatase 8                                                                                          |
| 796806 | In multiple ClusterIDs |          |                                                                                                                         |
| 25922  | Hs.250712              | CACNB3   | Calcium channel, voltage-dependent, beta 3 subunit                                                                      |
| 811000 | Hs.514535              | LGALS3BP | Lectin, galactoside-binding, soluble, 3 binding protein                                                                 |
| 109221 | Hs.591040              | TMEM194A | Transmembrane protein 194A                                                                                              |
| 43743  | In multiple ClusterIDs |          |                                                                                                                         |
| 243675 | Hs.371078              | FAM179B  | Family with sequence similarity 179, member B                                                                           |
| 150702 | Hs.654456              | HOXB5    | Homeobox B5                                                                                                             |
| 123980 | In multiple ClusterIDs |          |                                                                                                                         |
| 248371 | Hs.656374              |          | Transcribed locus, weakly similar to XP_002801923.1<br>PREDICTED: coatomer subunit alpha-like [ <i>Macaca mulatta</i> ] |
| 360213 | Hs.654519              | KCNAB1   | Potassium voltage-gated channel, shaker-related subfamily, beta member 1                                                |
| 812246 | Hs.371350              | HLCS     | Holocarboxylase synthetase<br>(biotin-(propionyl-CoA-carboxylase (ATP-hydrolysing)) ligase)                             |
| 37491  | Hs.515094              | TRIP10   | Thyroid hormone receptor interactor 10                                                                                  |
| 150314 | Hs.435850              |          | Transcribed locus                                                                                                       |
| 127928 | Hs.162032              | HBP1     | HMG-box transcription factor 1                                                                                          |
| 171936 | Hs.632391              | HPCA     | Hippocalcin                                                                                                             |
| 809494 | Hs.654379              | CD151    | CD151 molecule (Raph blood group)                                                                                       |
| 823679 | Hs.731853              | LDLRAD4  | Low density lipoprotein receptor class A domain containing 4                                                            |
| 198917 | Hs.632262              | FAM134C  | Family with sequence similarity 134, member C                                                                           |
| 129506 | In multiple ClusterIDs |          |                                                                                                                         |
| 300590 | Hs.536122              |          | TXNDC9                                                                                                                  |
| 243343 | Hs.189772              | CCT2     | Chaperonin containing TCP1, subunit 2 (beta)                                                                            |

|         |                        |             |                                                                                                        |
|---------|------------------------|-------------|--------------------------------------------------------------------------------------------------------|
| 810550  | Hs.78466               | PSMD8       | Proteasome (prosome, macropain) 26S subunit, non-ATPase, 8                                             |
| 878681  | Hs.400295              | RPL30       | Ribosomal protein L30                                                                                  |
| 2013956 | Hs.591665              | TIMP4       | TIMP metalloproteinase inhibitor 4                                                                     |
| 1756035 | Hs.709179              | TNNI3       | Troponin I type 3 (cardiac)                                                                            |
| 774078* | Hs.519075              | LMOD1       | Leiomodin 1 (smooth muscle)                                                                            |
| 814316  | Hs.410817              |             | RPL13                                                                                                  |
| 2408099 | Hs.714400              | TAF6L       | TAF6-like RNA polymerase II, p300/CBP-associated factor (PCAF)-associated factor, 65kDa                |
| 1405136 | Hs.417050              | CCNA1       | Cyclin A1                                                                                              |
| 878815  | Hs.119177              | ARF3        | ADP-ribosylation factor 3                                                                              |
| 488964  | Hs.530461              | HIST2H2AA3  | Histone cluster 2, H2aa3                                                                               |
| 2146142 | Hs.49774               | PTPRM       | Protein tyrosine phosphatase, receptor type, M                                                         |
| 712162  | Hs.146806              | CUL1        | Cullin 1                                                                                               |
| 768292  | Hs.304192              | <i>DSTN</i> | Destrin (actin depolymerizing factor)                                                                  |
| 740907  | Hs.73722               | APEX1       | APEX nuclease (multifunctional DNA repair enzyme) 1                                                    |
| 154472  | Hs.264887              | FGFR1       | Fibroblast growth factor receptor 1                                                                    |
| 82195   | Hs.159509              | SERPINF2    | Serpin peptidase inhibitor, clade F (alpha-2 antiplasmin, pigment epithelium derived factor), member 2 |
| 322914  | Hs.558296              | ACP1        | Acid phosphatase 1, soluble                                                                            |
| 378813  | Hs.517070              | SLPI        | Secretory leukocyte peptidase inhibitor                                                                |
| 809421  | Hs.3192                | PCBD1       | Pterin-4 alpha-carbinolamine dehydratase/dimerization cofactor of hepatocyte nuclear factor 1 alpha    |
| 1160558 | Hs.503860              | PTS         | 6-pyruvoyltetrahydropterin synthase                                                                    |
| 712460  | In multiple ClusterIDs |             |                                                                                                        |
| 2240793 | Hs.516646              | CREB1       | CAMP responsive element binding protein 1                                                              |
| 85171   | Hs.652183              | ARF4        | ADP-ribosylation factor 4                                                                              |
| 452780  | Hs.502836              | ARL2        | ADP-ribosylation factor-like 2                                                                         |
| 23353   | Hs.90791               | GABRA6      | Gamma-aminobutyric acid (GABA) A receptor, alpha 6                                                     |
| 341681  | Hs.438533              | POLI        | Polymerase (DNA directed) iota                                                                         |
| 282977  | Hs.481545              | ADCY2       | Adenylate cyclase 2 (brain)                                                                            |
| 878545  | Hs.515517              | RPL18       | Ribosomal protein L18                                                                                  |
| 151104  | Hs.76206               | CDH5        | Cadherin 5, type 2 (vascular endothelium)                                                              |
| 2089419 | Hs.649191              | SP1         | Sp1 transcription factor                                                                               |

|         |                |         |                                                                                             |
|---------|----------------|---------|---------------------------------------------------------------------------------------------|
| 884355  | Hs.618732      | WASF3   | WAS protein family, member 3                                                                |
| 50480   | Hs.226007      | ARG2    | Arginase, type II                                                                           |
| 772304  | Hs.632282      | SLC25A5 | Solute carrier family 25 (mitochondrial carrier; adenine nucleotide translocator), member 5 |
| 487373  | Hs.80986       | ATP5G1  | ATP synthase, H <sup>+</sup> transporting, mitochondrial Fo complex, subunit C1 (subunit 9) |
| 770835  | Hs.654441      | BCKDHB  | Branched chain keto acid dehydrogenase E1, beta polypeptide                                 |
| 279172  | Hs.315369      | AQP4    | Aquaporin 4                                                                                 |
| 363055  | Hs.188528      | ADD2    | Adducin 2 (beta)                                                                            |
| 814353  | Hs.96          | PMAIP1  | Phorbol-12-myristate-13-acetate-induced protein 1                                           |
| 344430  | Hs.473163      | BMP7    | Bone morphogenetic protein 7                                                                |
| 212188  | Hs.445358      | APOH    | Apolipoprotein H (beta-2-glycoprotein I)                                                    |
| 81604   | Hs.488007      | AOAH    | Acyloxyacyl hydrolase (neutrophil)                                                          |
| 66599   | Hs.591847      | NAT1    | N-acetyltransferase 1 (arylamine N-acetyltransferase)                                       |
| 41208   | Hs.1274        | BMP1    | Bone morphogenetic protein 1                                                                |
| 786680  | Hs.480653      | ANXA5   | Annexin A5                                                                                  |
| 450464  | Hs.470174      | ACVR2A  | Activin A receptor, type IIA                                                                |
| 200263  | Hs.93194       |         | APOA1                                                                                       |
| 788764  | Hs.57690       | CRYBA4  | Crystallin, beta A4                                                                         |
| 853687  | Hs.904         | AGL     | Amylo-alpha-1, 6-galactosidase, 4-alpha-galactanotransferase                                |
| 683662  | Hs.19156       | DAAM1   | Dishevelled associated activator of morphogenesis 1                                         |
| 2289993 | Data not found |         |                                                                                             |
| 2168295 | Hs.431048      | ABL1    | C-abl oncogene 1, non-receptor tyrosine kinase                                              |
| 2222800 | Hs.177766      | PARP1   | Poly (ADP-ribose) polymerase 1                                                              |
| 155     | Hs.525600      |         | HSP90AA1                                                                                    |
| 839552  | Hs.596314      | NCOA1   | Nuclear receptor coactivator 1                                                              |
| 2578588 | Hs.597216      | HIF1A   | Hypoxia inducible factor 1, alpha subunit (basic helix-loop-helix transcription factor)     |
| 1461158 | Hs.216639      | MSH4    | MutS homolog 4 (E. coli)                                                                    |
| 157     | Data not found |         |                                                                                             |
| 1403166 | Hs.444172      | TRAF6   | TNF receptor-associated factor 6, E3 ubiquitin protein ligase                               |
| 1309010 | Hs.407604      | MED14   | Mediator complex subunit 14                                                                 |
| 1881069 | Hs.386390      | TADA3   | Transcriptional adaptor 3                                                                   |
| 255094  | Data not found |         |                                                                                             |
| 954356  | Hs.76704       | AR      | Androgen receptor                                                                           |
| 182429  | Hs.194236      | LEP     | Leptin                                                                                      |

|         |                        |         |                                                                                                   |
|---------|------------------------|---------|---------------------------------------------------------------------------------------------------|
| 2168381 | Hs.507475              | RFC1    | Replication factor C (activator 1) 1, 145kDa                                                      |
| 2498145 | Hs.660607              | ESR2    | Estrogen receptor 2 (ER beta)                                                                     |
| 782275  | In multiple ClusterIDs |         |                                                                                                   |
| 843398  | Hs.73853               | BMP2    | Bone morphogenetic protein 2                                                                      |
| 1475659 | Hs.75799               | PRSS8   | Protease, serine, 8                                                                               |
| 1455566 | Data not found         |         |                                                                                                   |
| 767419  | In multiple ClusterIDs |         |                                                                                                   |
| 741988  | Hs.334707              |         | ACY1                                                                                              |
| 1475797 | Hs.476179              | SMARCC1 | SWI/SNF related, matrix associated, actin dependent regulator of chromatin, subfamily c, member 1 |
| 1472150 | Hs.409140              | ATP5O   | ATP synthase, H <sup>+</sup> transporting, mitochondrial F1 complex, O subunit                    |
| 768377  | In multiple ClusterIDs |         |                                                                                                   |
| 665674  | Hs.654542              | BDKRB2  | Bradykinin receptor B2                                                                            |
| 1476053 | Hs.631709              | RAD51   | RAD51 homolog ( <i>S. cerevisiae</i> )                                                            |
| 1325605 | Hs.518595              | NSG1    | Neuron specific gene family member 1                                                              |
| 1712192 | Hs.158560              | TAF1    | TAF1 RNA polymerase II, TATA box binding protein (TBP)-associated factor, 250kDa                  |
| 1844923 | Hs.409226              | MED12   | Mediator complex subunit 12                                                                       |
| 1686512 | Hs.510409              | CCNK    | Cyclin K                                                                                          |
| 2312437 | Hs.497487              | PIK3C2B | Phosphatidylinositol-4-phosphate 3-kinase, catalytic subunit type 2 beta                          |
| 2519221 | Hs.293753              | BOK     | BCL2-related ovarian killer                                                                       |
| 823717  | Data not found         |         |                                                                                                   |
| 681948  | Hs.655995              | FHIT    | Fragile histidine triad                                                                           |
| 126788  | Hs.119825              | SPTA1   | Spectrin, alpha, erythrocytic 1 (elliptocytosis 2)                                                |
| 243399  | Hs.728753              |         | GYPE                                                                                              |
| 35185   | Hs.27283               | GABRB1  | Gamma-aminobutyric acid (GABA) A receptor, beta 1                                                 |
| 131839  | Hs.73769               | FOLR1   | Folate receptor 1 (adult)                                                                         |
| 823943  | Hs.83722               | EPS15   | Epidermal growth factor receptor pathway substrate 15                                             |
| 60605   | In multiple ClusterIDs |         |                                                                                                   |
| 774446  | Hs.441047              | ADM     | Adrenomedullin                                                                                    |
| 1469234 | Hs.74124               | GPR143  | G protein-coupled receptor 143                                                                    |
| 1493390 | Hs.75117               | ILF2    | Interleukin enhancer binding factor 2                                                             |
| 277339  | Hs.523968              | TP53BP2 | Tumor protein p53 binding protein, 2                                                              |

|         |                        |         |                                                                                             |
|---------|------------------------|---------|---------------------------------------------------------------------------------------------|
| 773367  | Hs.370408              | COMT    | Catechol-O-methyltransferase                                                                |
| 1475633 | Hs.412117              | ANXA6   | Annexin A6                                                                                  |
| 1456937 | Hs.1154                | OVGP1   | Oviductal glycoprotein 1, 120kDa                                                            |
| 897641  | In multiple ClusterIDs |         |                                                                                             |
| 853570  | Hs.350927              | SLC25A6 | Solute carrier family 25 (mitochondrial carrier; adenine nucleotide translocator), member 6 |
| 1470333 | Hs.479602              | APBB2   | Amyloid beta (A4) precursor protein-binding, family B, member 2                             |
| 1473131 | Hs.332173              | TLE2    | Transducin-like enhancer of split 2 (E(sp1) homolog, Drosophila)                            |
| 242955  | Hs.533831              | USPL1   | Ubiquitin specific peptidase like 1                                                         |
| 753775  | Hs.484741              | GMPR    | Guanosine monophosphate reductase                                                           |
| 126368  | Hs.765                 | GATA1   | GATA binding protein 1 (globin transcription factor 1)                                      |
| 143519  | Hs.227729              | FKBP2   | FK506 binding protein 2, 13kDa                                                              |
| 323506  | Hs.431850              | MAPK1   | Mitogen-activated protein kinase 1                                                          |
| 122636  | Data not found         |         |                                                                                             |
| 260325  | Hs.473470              | GABPA   | GA binding protein transcription factor, alpha subunit 60kDa                                |
| 302292  | Hs.368404              | EXT2    | Exostosin glycosyltransferase 2                                                             |
| 753215  | Hs.134587              | GNAI1   | Guanine nucleotide binding protein (G protein), alpha inhibiting activity polypeptide 1     |
| 471498  | Hs.334534              | GNS     | Glucosamine (N-acetyl)-6-sulfatase                                                          |
| 469412  | Hs.592490              | FH      | Fumarate hydratase                                                                          |
| 665774  | Hs.249718              |         | EIF4E                                                                                       |
| 44563   | Hs.134974              | GAP43   | Growth associated protein 43                                                                |
| 51362   | Hs.481852              | GTF2B   | General transcription factor IIB                                                            |
| 308437  | Hs.370858              | FUCA1   | Fucosidase, alpha-L- 1, tissue                                                              |
| 34849   | Hs.515070              | EEF2    | Eukaryotic translation elongation factor 2                                                  |
| 71606   | Hs.10306               | NKG7    | Natural killer cell group 7 sequence                                                        |
| 823859  | In multiple ClusterIDs |         |                                                                                             |
| 810787  | In multiple ClusterIDs |         |                                                                                             |
| 701751  | Hs.191482              | CUX1    | Cut-like homeobox 1                                                                         |
| 897770  | Hs.405662              | CRABP2  | Cellular retinoic acid binding protein 2                                                    |
| 950096  | Hs.33642               | ARCN1   | Archain 1                                                                                   |
| 760224  | Hs.98493               | XRCC1   | X-ray repair complementing defective repair in Chinese                                      |

|        |                        |          |                                                                                     |
|--------|------------------------|----------|-------------------------------------------------------------------------------------|
|        |                        |          | hamster cells 1                                                                     |
| 795965 | Hs.80691               | CKMT2    | Creatine kinase, mitochondrial 2 (sarcomeric)                                       |
| 204301 | Hs.437705              | CDC25A   | Cell division cycle 25A                                                             |
| 785975 | Hs.335513              | F13A1    | Coagulation factor XIII, A1 polypeptide                                             |
| 666425 | Hs.472737              | TOP1     | Topoisomerase (DNA) I                                                               |
| 898092 | Hs.410037              | CTGF     | Connective tissue growth factor                                                     |
| 841664 | Hs.74034               | CAV1     | Caveolin 1, caveolae protein, 22kDa                                                 |
| 357046 | Hs.1323                | CNGA1    | Cyclic nucleotide gated channel alpha 1                                             |
| 868332 | Hs.347270              | HLA-DPA1 | Major histocompatibility complex, class II, DP alpha 1                              |
| 724893 | Hs.516119              | MOGS     | Mannosyl-oligosaccharide glucosidase                                                |
| 183103 | Hs.512856              | SEC14L5  | SEC14-like 5 (S. cerevisiae)                                                        |
| 755526 | Hs.122575              | LPAR2    | Lysophosphatidic acid receptor 2                                                    |
| 52881  | Hs.46296               | NHLH2    | Nescient helix loop helix 2                                                         |
| 203003 | Hs.9235                | NME4     | NME/NM23 nucleoside diphosphate kinase 4                                            |
| 826173 | Hs.494691              | PFN1     | Profilin 1                                                                          |
| 739901 | Hs.417077              | CYP51A1  | Cytochrome P450, family 51, subfamily A, polypeptide 1                              |
| 714426 | Hs.132370              | CSTF2    | Cleavage stimulation factor, 3' pre-RNA, subunit 2, 64kDa                           |
| 773301 | Hs.191842              | CDH3     | Cadherin 3, type 1, P-cadherin (placental)                                          |
| 950680 | Hs.290758              | DDB1     | Damage-specific DNA binding protein 1, 127kDa                                       |
| 949938 | Hs.712867              |          | Transcribed locus, strongly similar to NP_000090.1 CST3 gene product [Homo sapiens] |
| 724615 | Hs.469723              | RCC1     | Regulator of chromosome condensation 1                                              |
| 840894 | Hs.369624              |          | COX6A1                                                                              |
| 45641  | In multiple ClusterIDs |          |                                                                                     |
| 841641 | Hs.523852              | CCND1    | Cyclin D1                                                                           |
| 898258 | Hs.380138              | CHN1     | Chimerin 1                                                                          |
| 789049 | In multiple ClusterIDs |          |                                                                                     |
| 796297 | Hs.443134              | GBA2     | Glucosidase, beta (bile acid) 2                                                     |
| 212115 | Hs.154036              | PHLDA2   | Pleckstrin homology-like domain, family A, member 2                                 |
| 153541 | Hs.116092              | EPHB1    | EPH receptor B1                                                                     |
| 884283 | Data not found         |          |                                                                                     |
| 436741 | Hs.729265              | GPRASP1  | G protein-coupled receptor associated sorting protein 1                             |
| 869233 | Hs.134296              | DLC1     | Deleted in liver cancer 1                                                           |
| 970591 | Hs.434102              | HMGB1    | High mobility group box 1                                                           |
| 278483 | In multiple            |          |                                                                                     |

|         |                        |          |                                                                            |
|---------|------------------------|----------|----------------------------------------------------------------------------|
|         | ClusterIDs             |          |                                                                            |
| 455123  | Hs.336994              | MTSS1    | Metastasis suppressor 1                                                    |
| 34102   | Hs.133469              | GOLGA1   | Golgin A1                                                                  |
| 971212  | Hs.510172              | HIVEP2   | Human immunodeficiency virus type I enhancer binding protein 2             |
| 151449  | Hs.437040              | PTPN21   | Protein tyrosine phosphatase, non-receptor type 21                         |
| 41430   | Hs.145230              | CTIF     | CBP80/20-dependent translation initiation factor                           |
| 22883   | Hs.480085              | TNNI3K   | TNNI3 interacting kinase                                                   |
| 773568  | Hs.654522              | POU4F1   | POU class 4 homeobox 1                                                     |
| 30175   | Hs.160871              | PTPRO    | Protein tyrosine phosphatase, receptor type, O                             |
| 588609  | Hs.54697               | ARHGEF9  | Cdc42 guanine nucleotide exchange factor (GEF) 9                           |
| 796689  | Hs.733076              | NPFF     | Neuropeptide FF-amide peptide precursor                                    |
| 300250  | Hs.17987               | TXLNA    | Taxilin alpha                                                              |
| 413733  | Hs.522632              | TIMP1    | TIMP metalloproteinase inhibitor 1                                         |
| 1019798 | Data not found         |          |                                                                            |
| 175727  | Hs.462529              | TNFRSF25 | Tumor necrosis factor receptor superfamily, member 25                      |
| 307342  | In multiple ClusterIDs |          |                                                                            |
| 415851  | Hs.6838                | RND3     | Rho family GTPase 3                                                        |
| 25050   | Hs.124940              |          | RND1                                                                       |
| 190593  | Hs.166109              | ELAVL2   | ELAV (embryonic lethal, abnormal vision, Drosophila)-like 2 (Hu antigen B) |
| 310406  | Hs.654458              | IL6      | Interleukin 6 (interferon, beta 2)                                         |
| 417226  | Hs.202453              | MYC      | V-myc myelocytomatosis viral oncogene homolog (avian)                      |
| 35356   | Hs.410969              | NTRK3    | Neurotrophic tyrosine kinase, receptor, type 3                             |
| 204257  | Hs.591852              | ADAM9    | ADAM metalloproteinase domain 9                                            |
| 324183  | Hs.467304              | IL11     | Interleukin 11                                                             |
| 429926  | Hs.158932              | APC      | Adenomatous polyposis coli                                                 |
| 40887   | Hs.159142              | LFNG     | LFNG O-fucosylpeptide<br>3-beta-N-acetylglucosaminyltransferase            |
| 240961  | Hs.519873              | DSP      | Desmoplakin                                                                |
| 324655  | Hs.126256              | IL1B     | Interleukin 1, beta                                                        |
| 435470  | Hs.714993              |          | Transcribed locus                                                          |
| 811015  | Data not found         |          |                                                                            |
| 590264  | Hs.365706              | MGP      | Matrix Gla protein                                                         |
| 471642  | Hs.200841              | LAMA2    | Laminin, alpha 2                                                           |



|        |                        |          |                                                                          |
|--------|------------------------|----------|--------------------------------------------------------------------------|
| 489664 | Hs.229641              | SUB1     | SUB1 homolog ( <i>S. cerevisiae</i> )                                    |
| 773330 | Hs.190495              | GPNMB    | Glycoprotein (transmembrane) nmb                                         |
| 854444 | Hs.409934              | HLA-DQB1 | Major histocompatibility complex, class II, DQ beta 1                    |
| 502355 | Hs.567229              | ACO1     | Aconitase 1, soluble                                                     |
| 382564 | Hs.519385              | FOXD1    | Forkhead box D1                                                          |
| 154790 | Hs.415768              | NGFR     | Nerve growth factor receptor                                             |
| 810142 | In multiple ClusterIDs |          |                                                                          |
| 853988 | Hs.108104              | UBE2L3   | Ubiquitin-conjugating enzyme E2L 3                                       |
| 85541  | Hs.524518              |          | STAT6                                                                    |
| 123755 | Hs.473819              | ERG      | V-ets erythroblastosis virus E26 oncogene homolog (avian)                |
| 156748 | Hs.145586              | COL4A6   | Collagen, type IV, alpha 6                                               |
| 290230 | Hs.137427              | IRF8     | Interferon regulatory factor 8                                           |
| 375833 | Hs.396530              | HGF      | Hepatocyte growth factor (hepapoietin A; scatter factor)                 |
| 291290 | Hs.558402              | SSX4B    | Synovial sarcoma, X breakpoint 4B                                        |
| 163561 | Hs.432642              | MAPK12   | Mitogen-activated protein kinase 12                                      |
| 37234  | Hs.534341              | MAP4K2   | Mitogen-activated protein kinase kinase kinase kinase 2                  |
| 156045 | Hs.200600              | SCAMP3   | Secretory carrier membrane protein 3                                     |
| 811911 | In multiple ClusterIDs |          |                                                                          |
| 727210 | Hs.715837              |          | CDNA clone IMAGE:5266573                                                 |
| 193990 | Hs.17614               | ABCB10   | ATP-binding cassette, sub-family B (MDR/TAP), member 10                  |
| 49860  | Hs.256667              | PDK2     | Pyruvate dehydrogenase kinase, isozyme 2                                 |
| 884301 | Hs.557550              | NPM1     | Nucleophosmin (nucleolar phosphoprotein B23, numatrin)                   |
| 731054 | Hs.195799              | MTTP     | Microsomal triglyceride transfer protein                                 |
| 854701 | Hs.643030              | LIPA     | Lipase A, lysosomal acid, cholesterol esterase                           |
| 263836 | Hs.514802              | ZNF24    | Zinc finger protein 24                                                   |
| 845415 | Hs.319334              | NASP     | Nuclear autoantigenic sperm protein (histone-binding)                    |
| 291880 | Hs.389137              | MFAP2    | Microfibrillar-associated protein 2                                      |
| 878744 | Hs.523512              | TSG101   | Tumor susceptibility gene 101                                            |
| 755750 | Hs.463456              | NME2     | NME/NM23 nucleoside diphosphate kinase 2                                 |
| 969748 | Hs.485527              | MUT      | Methylmalonyl CoA mutase                                                 |
| 878413 | Hs.720597              |          | Transcribed locus                                                        |
| 755751 | Hs.287362              | TLE3     | Transducin-like enhancer of split 3 (E(sp1) homolog, <i>Drosophila</i> ) |
| 292388 | In multiple ClusterIDs |          |                                                                          |

|        |                        |         |                                                                                                           |
|--------|------------------------|---------|-----------------------------------------------------------------------------------------------------------|
| 45231  | Hs.657862              | GPR19   | G protein-coupled receptor 19                                                                             |
| 109265 | Hs.592591              | ZNF148  | Zinc finger protein 148                                                                                   |
| 296679 | In multiple ClusterIDs |         |                                                                                                           |
| 282310 | Hs.530749              | PPFIA1  | Protein tyrosine phosphatase, receptor type, f polypeptide (PTPRF), interacting protein (liprin), alpha 1 |
| 300482 | Hs.98751               | FUBP3   | Far upstream element (FUSE) binding protein 3                                                             |
| 212198 | Hs.523968              | TP53BP2 | Tumor protein p53 binding protein, 2                                                                      |
| 327304 | Hs.632447              | DCAF8   | DDB1 and CUL4 associated factor 8                                                                         |
| 245330 | Hs.272259              | IGF2    | Insulin-like growth factor 2 (somatomedin A)                                                              |
| 308588 | Hs.173464              | FKBP8   | FK506 binding protein 8, 38kDa                                                                            |
| 46284  | Hs.507669              | FRY     | Furry homolog (Drosophila)                                                                                |
| 33941  | Hs.89655               | PTPRN   | Protein tyrosine phosphatase, receptor type, N                                                            |
| 201890 | Hs.127799              | BIRC3   | Baculoviral IAP repeat containing 3                                                                       |
| 155583 | Hs.531251              | TRAF1   | TNF receptor-associated factor 1                                                                          |
| 139540 | Hs.520259              | OSBPL3  | Oxysterol binding protein-like 3                                                                          |
| 756847 | Hs.243994              | DEAF1   | DEAF1 transcription factor                                                                                |
| 345208 | Hs.184492              | ELAVL1  | ELAV (embryonic lethal, abnormal vision, Drosophila)-like 1 (Hu antigen R)                                |
| 754538 | Hs.356742              | DRAP1   | DR1-associated protein 1 (negative cofactor 2 alpha)                                                      |
| 782339 | In multiple ClusterIDs |         |                                                                                                           |
| 207087 | Hs.465337              | PHLPP1  | PH domain and leucine rich repeat protein phosphatase 1                                                   |
| 121530 | Hs.180535              |         | FERMT3                                                                                                    |
| 141627 | Hs.10784               | FAM46A  | Family with sequence similarity 46, member A                                                              |
| 33051  | In multiple ClusterIDs |         |                                                                                                           |
| 366341 | In multiple ClusterIDs |         |                                                                                                           |
| 202607 | Data not found         |         |                                                                                                           |
| 292719 | Hs.16157               | VIPAS39 | VPS33B interacting protein, apical-basolateral polarity regulator, spe-39 homolog                         |
| 838359 | Hs.77890               | GUCY1B3 | Guanylate cyclase 1, soluble, beta 3                                                                      |
| 26566  | In multiple ClusterIDs |         |                                                                                                           |
| 240945 | Hs.332119              |         | SLC22A25                                                                                                  |
| 137581 | Hs.534560              | SLC44A2 | Solute carrier family 44, member 2                                                                        |
| 433155 | Hs.30054               | F5      | Coagulation factor V (proaccelerin, labile factor)                                                        |
| 745402 | Hs.529862              | CSNK1A1 | Casein kinase 1, alpha 1                                                                                  |

|        |                        |         |                                                                             |
|--------|------------------------|---------|-----------------------------------------------------------------------------|
| 745214 | Hs.654552              | KDEL2   | KDEL (Lys-Asp-Glu-Leu) endoplasmic reticulum protein retention receptor 2   |
| 293689 | Hs.95612               | DSC2    | Desmocollin 2                                                               |
| 344759 | Hs.172865              | CSTF1   | Cleavage stimulation factor, 3' pre-RNA, subunit 1, 50kDa                   |
| 80221  | Hs.646                 | CPA3    | Carboxypeptidase A3 (mast cell)                                             |
| 214162 | Hs.438462              | MT1H    | Metallothionein 1H                                                          |
| 121316 | Hs.224012              | JAG1    | Jagged 1 (Alagille syndrome)                                                |
| 841278 | Hs.484738              | MYLIP   | Myosin regulatory light chain interacting protein                           |
| 66774  | In multiple ClusterIDs |         |                                                                             |
| 609332 | Hs.409662              | COL14A1 | Collagen, type XIV, alpha 1                                                 |
| 135608 | Hs.150122              | OSBPL10 | Oxysterol binding protein-like 10                                           |
| 66535  | Hs.744924              | OAZ2    | Ornithine decarboxylase antizyme 2                                          |
| 233365 | Hs.142442              | HP1BP3  | Heterochromatin protein 1, binding protein 3                                |
| 42076  | Hs.518123              | TFG     | TRK-fused gene                                                              |
| 382773 | Hs.621695              | MALAT1  | Metastasis associated lung adenocarcinoma transcript 1 (non-protein coding) |
| 112865 | Hs.26613               | LARP4   | La ribonucleoprotein domain family, member 4                                |
| 201986 | Hs.379548              | UBR3    | Ubiquitin protein ligase E3 component n-recognin 3 (putative)               |
| 845419 | Hs.744083              | FANCA   | Fanconi anemia, complementation group A                                     |
| 153505 | Hs.80552               | DPT     | Dermatopontin                                                               |
| 83549  | Hs.524224              | C1R     | Complement component 1, r subcomponent                                      |
| 415102 | Hs.656                 | CDC25C  | Cell division cycle 25C                                                     |
| 866882 | Hs.593928              | FDFT1   | Farnesyl-diphosphate farnesyltransferase 1                                  |
| 755228 | Hs.522413              | DNM1    | Dynamin 1                                                                   |
| 460470 | Hs.99886               | C4BPB   | Complement component 4 binding protein, beta                                |
| 377461 | In multiple ClusterIDs |         |                                                                             |
| 884867 | Hs.433702              | EIF5    | Eukaryotic translation initiation factor 5                                  |
| 878468 | Hs.513856              | DPH1    | DPH1 homolog (S. cerevisiae)                                                |
| 713974 | Hs.586219              | CSF1R   | Colony stimulating factor 1 receptor                                        |
| 845355 | Hs.128065              | CTSC    | Cathepsin C                                                                 |
| 725321 | Hs.208124              | ESR1    | Estrogen receptor 1                                                         |
| 770880 | Hs.654580              | PRIM2   | Primase, DNA, polypeptide 2 (58kDa)                                         |
| 769959 | Hs.508716              | COL4A2  | Collagen, type IV, alpha 2                                                  |
| 377314 | Hs.82201               | CSNK2A2 | Casein kinase 2, alpha prime polypeptide                                    |

|         |                        |         |                                                                                                 |
|---------|------------------------|---------|-------------------------------------------------------------------------------------------------|
| 743041  | Hs.380233              | BUD31   | BUD31 homolog ( <i>S. cerevisiae</i> )                                                          |
| 433162  | Hs.524871              | POLE    | Polymerase (DNA directed), epsilon, catalytic subunit                                           |
| 1916687 | Hs.501497              | CD70    | CD70 molecule                                                                                   |
| 2114863 | Hs.514527              |         | CDNA clone IMAGE:3354269                                                                        |
| 1647954 | Hs.150423              | CDK9    | Cyclin-dependent kinase 9                                                                       |
| 1736044 | Hs.647094              | FASTK   | Fas-activated serine/threonine kinase                                                           |
| 1927303 | Hs.433445              | JAG2    | Jagged 2                                                                                        |
| 2137170 | Hs.234569              | ZAP70   | Zeta-chain (TCR) associated protein kinase 70kDa                                                |
| 1652077 | Hs.296648              | BMP5    | Bone morphogenetic protein 5                                                                    |
| 1742260 | Hs.721234              | Sep-02  | Septin 2                                                                                        |
| 1932646 | Hs.213424              | SFRP1   | Secreted frizzled-related protein 1                                                             |
| 2145077 | Hs.83722               | EPS15   | Epidermal growth factor receptor pathway substrate 15                                           |
| 1662329 | Hs.437846              | SMO     | Smoothed, frizzled family receptor                                                              |
| 1751068 | Hs.158460              | CDK5R2  | Cyclin-dependent kinase 5, regulatory subunit 2 (p39)                                           |
| 1934348 | Hs.161000              | ARID4A  | AT rich interactive domain 4A (RBP1-like)                                                       |
| 2146427 | Hs.148090              | CDH15   | Cadherin 15, type 1, M-cadherin (myotubule)                                                     |
| 1674404 | Hs.120949              | CD36    | CD36 molecule (thrombospondin receptor)                                                         |
| 1752379 | Hs.100299              | LIG3    | Ligase III, DNA, ATP-dependent                                                                  |
| 1949445 | Hs.494312              | NTRK2   | Neurotrophic tyrosine kinase, receptor, type 2                                                  |
| 2157762 | Hs.138211              | MAPK8   | Mitogen-activated protein kinase 8                                                              |
| 592802  | Hs.527061              | RGS12   | Regulator of G-protein signaling 12                                                             |
| 280740  | Hs.654567              | DENND4A | DENN/MADD domain containing 4A                                                                  |
| 595109  | Hs.503368              | ALG8    | ALG8, alpha-1,3-glucosyltransferase                                                             |
| 278101  | In multiple ClusterIDs |         |                                                                                                 |
| 743278  | Hs.129055              | ODF2    | Outer dense fiber of sperm tails 2                                                              |
| 324715  | In multiple ClusterIDs |         |                                                                                                 |
| 252382  | Data not found         |         |                                                                                                 |
| 950473  | Hs.600503              |         | Transcribed locus, strongly similar to NP_003070.3 SMARCE1 gene product [ <i>Homo sapiens</i> ] |
| 840803  | In multiple ClusterIDs |         |                                                                                                 |
| 593183  | Hs.5509                | EVI2B   | Ecotropic viral integration site 2B                                                             |
| 897595  | Hs.153934              | CBFA2T2 | Core-binding factor, runt domain, alpha subunit 2; translocated to, 2                           |

|         |                        |         |                                                                                                                                 |
|---------|------------------------|---------|---------------------------------------------------------------------------------------------------------------------------------|
| 626716  | Hs.192221              | ELL2    | Elongation factor, RNA polymerase II, 2                                                                                         |
| 1632285 | Hs.654570              | KRT15   | Keratin 15                                                                                                                      |
| 1733423 | Hs.435981              | ERCC1   | Excision repair cross-complementing rodent repair deficiency, complementation group 1 (includes overlapping antisense sequence) |
| 1893144 | Hs.356076              | XIAP    | X-linked inhibitor of apoptosis                                                                                                 |
| 2107532 | Hs.654470              | ITGB7   | Integrin, beta 7                                                                                                                |
| 1643268 | Hs.156316              | DCN     | Decorin                                                                                                                         |
| 1734498 | Hs.533683              | FGFR2   | Fibroblast growth factor receptor 2                                                                                             |
| 365060  | Hs.321541              | RAB11A  | RAB11A, member RAS oncogene family                                                                                              |
| 809992  | In multiple ClusterIDs |         |                                                                                                                                 |
| 256664  | Hs.477879              | H2AFX   | H2A histone family, member X                                                                                                    |
| 210862  | Hs.464137              | ACOX1   | Acyl-CoA oxidase 1, palmitoyl                                                                                                   |
| 234237  | Hs.495728              | PIR     | Pirin (iron-binding nuclear protein)                                                                                            |
| 184365  | Hs.150423              | CDK9    | Cyclin-dependent kinase 9                                                                                                       |
| 526945  | In multiple ClusterIDs |         |                                                                                                                                 |
| 843234  | Hs.90458               | SPTLC1  | Serine palmitoyltransferase, long chain base subunit 1                                                                          |
| 837923  | In multiple ClusterIDs |         |                                                                                                                                 |
| 839980  | Hs.719203              | SLC37A4 | Solute carrier family 37 (glucose-6-phosphate transporter), member 4                                                            |
| 509887  | Hs.533282              | NONO    | Non-POU domain containing, octamer-binding                                                                                      |
| 855872  | Hs.584782              | NRD1    | Nardilysin (N-arginine dibasic convertase)                                                                                      |
| 377048  | Hs.439620              | MYO1B   | Myosin IB                                                                                                                       |
| 595604  | Hs.524599              | NAP1L1  | Nucleosome assembly protein 1-like 1                                                                                            |
| 135338  | Hs.584833              | TAF1B   | TATA box binding protein (TBP)-associated factor, RNA polymerase I, B, 63kDa                                                    |
| 511909  | Hs.591853              | CDH17   | Cadherin 17, LI cadherin (liver-intestine)                                                                                      |
| 626555  | Hs.631863              | PNPLA6  | Patatin-like phospholipase domain containing 6                                                                                  |
| 838744  | Hs.467084              | EIF4G3  | Eukaryotic translation initiation factor 4 gamma, 3                                                                             |
| 296587  | Hs.196952              | HLF     | Hepatic leukemia factor                                                                                                         |
| 108667  | Hs.406277              | SF3A1   | Splicing factor 3a, subunit 1, 120kDa                                                                                           |
| 752732  | In multiple ClusterIDs |         |                                                                                                                                 |
| 251019  | Hs.461086              | CDH1    | Cadherin 1, type 1, E-cadherin (epithelial)                                                                                     |
| 246079  | In multiple ClusterIDs |         |                                                                                                                                 |
| 295798  | Hs.90061               | PGRMC1  | Progesterone receptor membrane component 1                                                                                      |

|        |                        |          |                                                                                       |
|--------|------------------------|----------|---------------------------------------------------------------------------------------|
| 132012 | Hs.443837              | NPEPPS   | Aminopeptidase puromycin sensitive                                                    |
| 755239 | In multiple ClusterIDs |          |                                                                                       |
| 124824 | Hs.546269              | RPL10A   | Ribosomal protein L10a                                                                |
| 813854 | Hs.443121              | PURA     | Purine-rich element binding protein A                                                 |
| 49518  | Hs.491988              | TRAM1    | Translocation associated membrane protein 1                                           |
| 26711  | Hs.591671              | NCBP2    | Nuclear cap binding protein subunit 2, 20kDa                                          |
| 120572 | Hs.370140              | HELZ     | Helicase with zinc finger                                                             |
| 564621 | Hs.478153              | SERPINI1 | Serpin peptidase inhibitor, clade I (neuroserpin), member 1                           |
| 823930 | Hs.124126              | ARPC1A   | Actin related protein 2/3 complex, subunit 1A, 41kDa                                  |
| 363144 | Hs.33102               | TFAP2B   | Transcription factor AP-2 beta (activating enhancer binding protein 2 beta)           |
| 724112 | Hs.98661               | HOXD-AS1 | HOXD cluster antisense RNA 1                                                          |
| 813536 | Hs.464971              | PIK3C3   | Phosphatidylinositol 3-kinase, catalytic subunit type 3                               |
| 666128 | Hs.155597              | CFD      | Complement factor D (adipsin)                                                         |
| 704020 | Hs.592192              | CSF2RB   | Colony stimulating factor 2 receptor, beta, low-affinity (granulocyte-macrophage)     |
| 83605  | Hs.149252              | CPS1     | Carbamoyl-phosphate synthase 1, mitochondrial                                         |
| 704459 | In multiple ClusterIDs |          |                                                                                       |
| 842860 | Hs.654593              | IL10RB   | Interleukin 10 receptor, beta                                                         |
| 810632 | Hs.420269              | COL6A2   | Collagen, type VI, alpha 2                                                            |
| 511521 | Hs.567968              | CANX     | Calnexin                                                                              |
| 490368 | Hs.34341               | CD58     | CD58 molecule                                                                         |
| 40017  | Hs.437060              |          | CYCS                                                                                  |
| 839991 | Hs.489142              | COL1A2   | Collagen, type I, alpha 2                                                             |
| 40751  | Hs.368322              | CDH8     | Cadherin 8, type 2                                                                    |
| 713145 | Hs.502328              | CD44     | CD44 molecule (Indian blood group)                                                    |
| 505491 | Hs.474010              | PTTG1IP  | Pituitary tumor-transforming 1 interacting protein                                    |
| 51406  | Hs.655498              | SLC13A3  | Solute carrier family 13 (sodium-dependent dicarboxylate transporter), member 3       |
| 324749 | Hs.380133              | ZHX3     | Zinc fingers and homeoboxes 3                                                         |
| 741852 | Hs.531111              | YLPM1    | YLP motif containing 1                                                                |
| 135085 | Hs.632161              | AP3S2    | Adaptor-related protein complex 3, sigma 2 subunit                                    |
| 203732 | Hs.520989              | FGL2     | Fibrinogen-like 2                                                                     |
| 51666  | Hs.469872              | ERCC3    | Excision repair cross-complementing rodent repair deficiency, complementation group 3 |

|        |                        |          |                                                                                               |
|--------|------------------------|----------|-----------------------------------------------------------------------------------------------|
| 85497  | Hs.408903              | C2       | Complement component 2                                                                        |
| 841470 | Hs.148641              | CTSH     | Cathepsin H                                                                                   |
| 897531 | In multiple ClusterIDs |          |                                                                                               |
| 842849 | Hs.201897              | POLA2    | Polymerase (DNA directed), alpha 2, accessory subunit                                         |
| 898122 | Hs.78065               | C7       | Complement component 7                                                                        |
| 774754 | Hs.476018              | CTNNB1   | Catenin (cadherin-associated protein), beta 1, 88kDa                                          |
| 725454 | Hs.83758               | CKS2     | CDC28 protein kinase regulatory subunit 2                                                     |
| 838373 | Hs.191518              | DHX9     | DEAH (Asp-Glu-Ala-His) box polypeptide 9                                                      |
| 85634  | Hs.458355              | C1S      | Complement component 1, s subcomponent                                                        |
| 795840 | Hs.719698              |          | Transcribed locus                                                                             |
| 840978 | In multiple ClusterIDs |          |                                                                                               |
| 397495 | Hs.656653              | CTNNA1   | Catenin (cadherin-associated protein), alpha 1, 102kDa                                        |
| 249603 | Hs.276271              | STK39    | Serine threonine kinase 39                                                                    |
| 884719 | Hs.180414              | HSPA8    | Heat shock 70kDa protein 8                                                                    |
| 882483 | Hs.7879                | IFRD1    | Interferon-related developmental regulator 1                                                  |
| 448098 | Hs.355581              | ZBTB43   | Zinc finger and BTB domain containing 43                                                      |
| 489823 | Hs.534383              | COX17    | Cytochrome c oxidase assembly homolog 17 (yeast)                                              |
| 772890 | Hs.592121              | RABEP1   | Rabaptin, RAB GTPase binding effector protein 1                                               |
| 840474 | Hs.286226              | MYO1C    | Myosin IC                                                                                     |
| 52926  | Hs.654743              | SRGAP3   | SLIT-ROBO Rho GTPase activating protein 3                                                     |
| 39843  | Hs.26047               | CELF3    | CUGBP, Elav-like family member 3                                                              |
| 178569 | Hs.440896              | SLC9A3R2 | Solute carrier family 9, subfamily A (NHE3, cation proton antiporter 3), member 3 regulator 2 |
| 270505 | Hs.2399                | MMP14    | Matrix metalloproteinase 14 (membrane-inserted)                                               |
| 122298 | Hs.516107              | TET3     | Tet methylcytosine dioxygenase 3                                                              |
| 588559 | Hs.103315              | ZNF384   | Zinc finger protein 384                                                                       |
| 306444 | Hs.112444              | TAF11    | TAF11 RNA polymerase II, TATA box binding protein (TBP)-associated factor, 28kDa              |
| 471664 | Hs.128702              | FBXO46   | F-box protein 46                                                                              |
| 133118 | Hs.277624              | ZZEF1    | Zinc finger, ZZ-type with EF-hand domain 1                                                    |
| 197520 | Hs.592142              | NCOA3    | Nuclear receptor coactivator 3                                                                |
| 342349 | Hs.404183              | MAP3K14  | Mitogen-activated protein kinase kinase kinase 14                                             |
| 470672 | Hs.132257              | TANK     | TRAF family member-associated NFKB activator                                                  |
| 79829  | Hs.390729              | ERBB4    | V-erb-a erythroblastic leukemia viral oncogene homolog 4 (avian)                              |

|        |                        |          |                                                                                               |
|--------|------------------------|----------|-----------------------------------------------------------------------------------------------|
| 271662 | Hs.233552              | CDK13    | Cyclin-dependent kinase 13                                                                    |
| 346177 | Hs.81134               | IL1RN    | Interleukin 1 receptor antagonist                                                             |
| 486591 | Hs.269109              | SEMA3C   | Sema domain, immunoglobulin domain (Ig), short basic domain, secreted, (semaphorin) 3C        |
| 139637 | Hs.2164                | PPBP     | Pro-platelet basic protein (chemokine (C-X-C motif) ligand 7)                                 |
| 277305 | Hs.502876              | RHOB     | Ras homolog family member B                                                                   |
| 359976 | Hs.708195              | IFNAR2   | Interferon (alpha, beta and omega) receptor 2                                                 |
| 489519 | Hs.644633              | TIMP3    | TIMP metalloproteinase inhibitor 3                                                            |
| 145844 | Hs.1976                | PDGFB    | Platelet-derived growth factor beta polypeptide                                               |
| 285460 | Hs.390171              | COL11A2  | Collagen, type XI, alpha 2                                                                    |
| 362834 | Hs.445402              | CDK18    | Cyclin-dependent kinase 18                                                                    |
| 491403 | In multiple ClusterIDs |          |                                                                                               |
| 151501 | Hs.89640               | TEK      | TEK tyrosine kinase, endothelial                                                              |
| 287687 | Hs.529400              | IFNAR1   | Interferon (alpha, beta and omega) receptor 1                                                 |
| 365826 | Hs.65029               | GAS1     | Growth arrest-specific 1                                                                      |
| 563602 | Hs.408182              | COL2A1   | Collagen, type II, alpha 1                                                                    |
| 154720 | Hs.433291              | NAA10    | N(alpha)-acetyltransferase 10, NatA catalytic subunit                                         |
| 855547 | Hs.696211              | HLA-DRB1 | Major histocompatibility complex, class II, DR beta 1                                         |
| 287687 | Hs.529400              | IFNAR1   | Interferon (alpha, beta and omega) receptor 1                                                 |
| 290091 | Hs.256747              | SPAG8    | Sperm associated antigen 8                                                                    |
| 359661 | Hs.183109              | MAOA     | Monoamine oxidase A                                                                           |
| 293925 | In multiple ClusterIDs |          |                                                                                               |
| 755578 | Hs.513797              | SLC7A5   | Solute carrier family 7 (amino acid transporter light chain, L system), member 5              |
| 854696 | Hs.521924              | PUF60    | Poly-U binding splicing factor 60KDa                                                          |
| 784296 | Hs.163924              | NR3C2    | Nuclear receptor subfamily 3, group C, member 2                                               |
| 344589 | In multiple ClusterIDs |          |                                                                                               |
| 344134 | Hs.348935              | IGLL1    | Immunoglobulin lambda-like polypeptide 1                                                      |
| 244951 | Hs.654604              | PPP5C    | Protein phosphatase 5, catalytic subunit                                                      |
| 48283  | Hs.654492              | EPHA5    | EPH receptor A5                                                                               |
| 246722 | Hs.38449               | SERPINE2 | Serpin peptidase inhibitor, clade E (nexin, plasminogen activator inhibitor type 1), member 2 |
| 341609 | In multiple ClusterIDs |          |                                                                                               |



|        |                        |         |                                                                                                      |
|--------|------------------------|---------|------------------------------------------------------------------------------------------------------|
| 446360 | Hs.472860              | CD40    | CD40 molecule, TNF receptor superfamily member 5                                                     |
| 52096  | Hs.74615               | PDGFRA  | Platelet-derived growth factor receptor, alpha polypeptide                                           |
| 267256 | Hs.410037              | CTGF    | Connective tissue growth factor                                                                      |
| 289337 | Hs.510635              | IGHG1   | Immunoglobulin heavy constant gamma 1 (G1m marker)                                                   |
| 347434 | Hs.446459              | LEPREL4 | Leprecan-like 4                                                                                      |
| 823614 | Hs.584809              | TDG     | Thymine-DNA glycosylase                                                                              |
| 364329 | In multiple ClusterIDs |         |                                                                                                      |
| 768272 | In multiple ClusterIDs |         |                                                                                                      |
| 27787  | Hs.148909              | CHL1    | Cell adhesion molecule with homology to L1CAM (close homolog of L1)                                  |
| 436554 | Hs.458272              | MPO     | Myeloperoxidase                                                                                      |
| 611443 | Hs.517586              | MB      | Myoglobin                                                                                            |
| 757440 | In multiple ClusterIDs |         |                                                                                                      |
| 471859 | Hs.314327              | MEF2D   | Myocyte enhancer factor 2D                                                                           |
| 611255 | Hs.35937               | MYF6    | Myogenic factor 6 (herculin)                                                                         |
| 273546 | Hs.518774              | PAICS   | Phosphoribosylaminoimidazole carboxylase, phosphoribosylaminoimidazole succinocarboxamide synthetase |
| 298417 | Hs.82961               | TFF3    | Trefoil factor 3 (intestinal)                                                                        |
| 435551 | Hs.443258              | SREBF2  | Sterol regulatory element binding transcription factor 2                                             |
| 433567 | Hs.105806              | GPLY    | Granulysin                                                                                           |
| 447568 | Hs.532632              | ATXN3   | Ataxin 3                                                                                             |
| 289496 | Hs.437609              | IFIT2   | Interferon-induced protein with tetratricopeptide repeats 2                                          |
| 857661 | Hs.406423              | SF3B2   | Splicing factor 3b, subunit 2, 145kDa                                                                |
| 768205 | In multiple ClusterIDs |         |                                                                                                      |
| 771000 | Hs.5086                | RBM42   | RNA binding motif protein 42                                                                         |
| 510542 | Hs.651244              | GPA33   | Glycoprotein A33 (transmembrane)                                                                     |
| 26021  | Hs.463928              | DLG4    | Discs, large homolog 4 (Drosophila)                                                                  |
| 741815 | Hs.644711              |         | Transcribed locus                                                                                    |
| 564962 | Hs.522868              | DAZ1    | Deleted in azoospermia 1                                                                             |
| 241982 | Hs.57079               | PIP4K2A | Phosphatidylinositol-5-phosphate 4-kinase, type II, alpha                                            |
| 46897  | Hs.30954               | PMVK    | Phosphomevalonate kinase                                                                             |
| 31093  | Hs.654386              | CDH13   | Cadherin 13, H-cadherin (heart)                                                                      |

|        |                        |           |                                                                                                                                             |
|--------|------------------------|-----------|---------------------------------------------------------------------------------------------------------------------------------------------|
| 280236 | In multiple ClusterIDs |           |                                                                                                                                             |
| 727792 | Hs.191046              | PDE1A     | Phosphodiesterase 1A, calmodulin-dependent                                                                                                  |
| 41356  | Hs.744012              | PPP2R5A   | Protein phosphatase 2, regulatory subunit B', alpha                                                                                         |
| 767765 | Hs.654463              | GEM       | GTP binding protein overexpressed in skeletal muscle                                                                                        |
| 754355 | Hs.27621               | SEMA5A    | Sema domain, seven thrombospondin repeats (type 1 and type 1-like), transmembrane domain (TM) and short cytoplasmic domain, (semaphorin) 5A |
| 361048 | Hs.122523              | SND1      | Staphylococcal nuclease and tudor domain containing 1                                                                                       |
| 293104 | Hs.498732              | PHYH      | Phytanoyl-CoA 2-hydroxylase                                                                                                                 |
| 563598 | Hs.26225               | GABRP     | Gamma-aminobutyric acid (GABA) A receptor, pi                                                                                               |
| 204214 | Hs.405958              | CDC6      | Cell division cycle 6                                                                                                                       |
| 66953  | Hs.417029              | ELP5      | Elongator acetyltransferase complex subunit 5                                                                                               |
| 202722 | Data not found         |           |                                                                                                                                             |
| 684940 | Hs.267632              | TMF1      | TATA element modulatory factor 1                                                                                                            |
| 230202 | Hs.467239              | ZNF347    | Zinc finger protein 347                                                                                                                     |
| 292217 | Hs.434951              | USP15     | Ubiquitin specific peptidase 15                                                                                                             |
| 246543 | Data not found         |           |                                                                                                                                             |
| 161950 | Hs.483486              | KDM3B     | Lysine (K)-specific demethylase 3B                                                                                                          |
| 705265 | Hs.729053              | ZMYM6     | Zinc finger, MYM-type 6                                                                                                                     |
| 246749 | Hs.744927              | DOCK7     | Dedicator of cytokinesis 7                                                                                                                  |
| 565493 | In multiple ClusterIDs |           |                                                                                                                                             |
| 67033  | Hs.170205              | LOC729041 | Fatty acid amide hydrolase pseudogene                                                                                                       |
| 161484 | Multiple genes         |           |                                                                                                                                             |
| 366067 | Hs.513430              | CDR2      | Cerebellar degeneration-related protein 2, 62kDa                                                                                            |
| 307471 | Hs.441664              | TSPAN7    | Tetraspanin 7                                                                                                                               |
| 123971 | Hs.648635              | DHFR      | Dihydrofolate reductase                                                                                                                     |
| 624754 | Hs.460988              | CBFB      | Core-binding factor, beta subunit                                                                                                           |
| 739193 | Hs.346950              | CRABP1    | Cellular retinoic acid binding protein 1                                                                                                    |
| 123264 | Hs.479214              | CD38      | CD38 molecule                                                                                                                               |
| 214816 | In multiple ClusterIDs |           |                                                                                                                                             |
| 242820 | In multiple ClusterIDs |           |                                                                                                                                             |
| 124052 | Hs.226284              |           | Transcribed locus                                                                                                                           |
| 310356 | Hs.9613                | ANGPTL4   | Angiopoietin-like 4                                                                                                                         |
| 119882 | In multiple ClusterIDs |           |                                                                                                                                             |
| 195875 | Data not found         |           |                                                                                                                                             |

|         |                        |         |                                                                                        |
|---------|------------------------|---------|----------------------------------------------------------------------------------------|
| 120343  | Data not found         |         |                                                                                        |
| 245444  | Hs.458973              | ZFHX4   | Zinc finger homeobox 4                                                                 |
| 129392  | Hs.438673              |         | ANKRD13D                                                                               |
| 195200  | Hs.278064              | ZNF37BP | Zinc finger protein 37B, pseudogene                                                    |
| 130008  | Data not found         |         |                                                                                        |
| 127408  | Hs.515696              | ZNF737  | Zinc finger protein 737                                                                |
| 809828  | Hs.445758              |         | E2F5                                                                                   |
| 295843  | Hs.516700              | CYP27A1 | Cytochrome P450, family 27, subfamily A, polypeptide 1                                 |
| 366541  | In multiple ClusterIDs |         |                                                                                        |
| 486787  | Hs.483454              | CNN3    | Calponin 3, acidic                                                                     |
| 897006  | Hs.368240              | DYRK1A  | Dual-specificity tyrosine-(Y)-phosphorylation regulated kinase 1A                      |
| 415817  | In multiple ClusterIDs |         |                                                                                        |
| 110744  | Hs.730607              | NCAPH2  | Non-SMC condensin II complex, subunit H2                                               |
| 882548  | Hs.515371              | CAPNS1  | Calpain, small subunit 1                                                               |
| 384015  | Hs.359698              | DDC     | Dopa decarboxylase (aromatic L-amino acid decarboxylase)                               |
| 344997  | Hs.139389              | CST6    | Cystatin E/M                                                                           |
| 46367   | Hs.77221               | CHKA    | Choline kinase alpha                                                                   |
| 724888  | Hs.436317              | CYP4B1  | Cytochrome P450, family 4, subfamily B, polypeptide 1                                  |
| 361688  | Hs.490684              | DPP6    | Dipeptidyl-peptidase 6                                                                 |
| 130242  | Hs.184298              | CDK7    | Cyclin-dependent kinase 7                                                              |
| 472008  | Hs.301921              | CCR1    | Chemokine (C-C motif) receptor 1                                                       |
| 854401  | Hs.407535              | PRKG1   | Protein kinase, cGMP-dependent, type I                                                 |
| 279665  | Hs.502315              | PDHX    | Pyruvate dehydrogenase complex, component X                                            |
| 455128  | Hs.1973                | CCNF    | Cyclin F                                                                               |
| 2021468 | Hs.518530              | PAK2    | P21 protein (Cdc42/Rac)-activated kinase 2                                             |
| 2163351 | Hs.368982              | CASP2   | Caspase 2, apoptosis-related cysteine peptidase                                        |
| 1708905 | Hs.91985               | WNT10B  | Wingless-type MMTV integration site family, member 10B                                 |
| 1847162 | Hs.437460              | TP53    | Tumor protein p53                                                                      |
| 2062345 | Hs.523329              | EPHB2   | EPH receptor B2                                                                        |
| 2168944 | Hs.646917              | FLT4    | Fms-related tyrosine kinase 4                                                          |
| 1711438 | Hs.407995              | MIF     | Macrophage migration inhibitory factor (glycosylation-inhibiting factor)               |
| 1854033 | Hs.104                 | HGFAC   | HGF activator                                                                          |
| 2064198 | Hs.32981               | SEMA3F  | Sema domain, immunoglobulin domain (Ig), short basic domain, secreted, (semaphorin) 3F |

|         |                        |         |                                                                                             |
|---------|------------------------|---------|---------------------------------------------------------------------------------------------|
| 825260  | In multiple ClusterIDs |         |                                                                                             |
| 1722882 | Hs.467284              | RPS9    | Ribosomal protein S9                                                                        |
| 1857026 | Hs.2258                | MMP10   | Matrix metalloproteinase 10 (stromelysin 2)                                                 |
| 2090264 | Hs.591873              | IL7     | Interleukin 7                                                                               |
| 1283333 | Hs.35758               | KAT6B   | K(lysine) acetyltransferase 6B                                                              |
| 1723720 | Hs.502659              | RHOC    | Ras homolog family member C                                                                 |
| 1875987 | Hs.643085              | WNT5A   | Wingless-type MMTV integration site family, member 5A                                       |
| 2104117 | Hs.473231              | CDH4    | Cadherin 4, type 1, R-cadherin (retinal)                                                    |
| 2506249 | Hs.743372              | BAZ1B   | Bromodomain adjacent to zinc finger domain, 1B                                              |
| 839374  | Hs.357637              | EXTL2   | Exostosin-like glycosyltransferase 2                                                        |
| 510856  | In multiple ClusterIDs |         |                                                                                             |
| 773203  | In multiple ClusterIDs |         |                                                                                             |
| 610097  | Hs.10136               | BPHL    | Biphenyl hydrolase-like (serine hydrolase)                                                  |
| 884272  | Hs.706888              |         | Transcribed locus                                                                           |
| 773383  | Hs.591229              | DLEU1   | Deleted in lymphocytic leukemia 1 (non-protein coding)                                      |
| 611150  | Hs.429                 | ATP5G3  | ATP synthase, H <sup>+</sup> transporting, mitochondrial Fo complex, subunit C3 (subunit 9) |
| 753794  | Hs.100431              | CXCL13  | Chemokine (C-X-C motif) ligand 13                                                           |
| 770675  | Hs.733403              | TMED2   | Transmembrane emp24 domain trafficking protein 2                                            |
| 545403  | Hs.114412              | TXNL1   | Thioredoxin-like 1                                                                          |
| 839882  | In multiple ClusterIDs |         |                                                                                             |
| 627039  | Hs.594351              | ADAM12  | ADAM metalloproteinase domain 12                                                            |
| 1682258 | Hs.367900              | PDCD2   | Programmed cell death 2                                                                     |
| 1837472 | Hs.845                 | IL13    | Interleukin 13                                                                              |
| 2014424 | Hs.159494              | BTK     | Bruton agammaglobulinemia tyrosine kinase                                                   |
| 2161567 | Hs.93574               | HOXD3   | Homeobox D3                                                                                 |
| 1704980 | Hs.567260              | DSC1    | Desmocollin 1                                                                               |
| 1839737 | Hs.594952              | DES     | Desmin                                                                                      |
| 813751  | Hs.591947              | ST3GAL4 | ST3 beta-galactoside alpha-2,3-sialyltransferase 4                                          |
| 194182  | In multiple ClusterIDs |         |                                                                                             |
| 740027  | Hs.13318               | DISC1   | Disrupted in schizophrenia 1                                                                |
| 547058  | Hs.79101               | CCNG1   | Cyclin G1                                                                                   |

|         |                        |         |                                                                             |
|---------|------------------------|---------|-----------------------------------------------------------------------------|
| 299154  | In multiple ClusterIDs |         |                                                                             |
| 470175  | Hs.6917                | CMC4    | C-x(9)-C motif containing 4 homolog ( <i>S. cerevisiae</i> )                |
| 1049033 | Hs.86368               | CLGN    | Calmegin                                                                    |
| 784109  | Hs.371199              | SGCE    | Sarcoglycan, epsilon                                                        |
| 594633  | Hs.210995              | CA12    | Carbonic anhydrase XII                                                      |
| 840766  | Hs.495656              | TBL1X   | Transducin (beta)-like 1X-linked                                            |
| 593114  | Hs.530477              | SIPA1   | Signal-induced proliferation-associated 1                                   |
| 842861  | Hs.373763              | HNRNPR  | Heterogeneous nuclear ribonucleoprotein R                                   |
| 30473   | Hs.524899              | SAP18   | Sin3A-associated protein, 18kDa                                             |
| 843098  | Hs.201641              | BASP1   | Brain abundant, membrane attached signal protein 1                          |
| 725630  | Hs.517216              | PEA15   | Phosphoprotein enriched in astrocytes 15                                    |
| 842918  | Hs.403917              | FARP1   | FERM, RhoGEF (ARHGEF) and pleckstrin domain protein 1 (chondrocyte-derived) |
| 877664  | In multiple ClusterIDs |         |                                                                             |
| 299559  | Hs.524788              | RAB35   | RAB35, member RAS oncogene family                                           |
| 121621  | Hs.106212              | HNRNPU  | Heterogeneous nuclear ribonucleoprotein U (scaffold attachment factor A)    |
| 234562  | Hs.210367              | SCAF11  | SR-related CTD-associated factor 11                                         |
| 511428  | Hs.301350              | FXYD3   | FXYD domain containing ion transport regulator 3                            |
| 302591  | Hs.654594              | RHOH    | Ras homolog family member H                                                 |
| 669443  | Hs.158195              | HSF2    | Heat shock transcription factor 2                                           |
| 40056   | Hs.513044              | CSPG4   | Chondroitin sulfate proteoglycan 4                                          |
| 727292  | Hs.504641              | CD163   | CD163 molecule                                                              |
| 241880  | Hs.510328              | DDX24   | DEAD (Asp-Glu-Ala-Asp) box polypeptide 24                                   |
| 193383  | Hs.529609              | ATP13A3 | ATPase type 13A3                                                            |
| 809353  | Hs.75254               | IRF3    | Interferon regulatory factor 3                                              |
| 72050   | Hs.430733              | CLNS1A  | Chloride channel, nucleotide-sensitive, 1A                                  |
| 177737  | Hs.443121              | PURA    | Purine-rich element binding protein A                                       |
| 823756  | Hs.509343              | FERMT2  | Fermitin family member 2                                                    |
| 525518  | Hs.386939              | USP7    | Ubiquitin specific peptidase 7 (herpes virus-associated)                    |
| 810040  | Hs.23119               | TMEM187 | Transmembrane protein 187                                                   |
| 810724  | Hs.76095               | IER3    | Immediate early response 3                                                  |
| 301018  | Hs.659851              | CDKL5   | Cyclin-dependent kinase-like 5                                              |
| 243741  | Hs.44532               | UBD     | Ubiquitin D                                                                 |

\* clones that corresponded to the 'leio-subclass' genes from Nielsen *et al.* (1)
