# Supplementary material for: Gene expression profiling identifies distinct molecular subgroups of leiomyosarcoma with clinical relevance
Source: PubMed Central journal article supplement (PMC5061910; doi:10.1038/bjc.2016.280), 2016-09-08
Supplement: bjc2016280x4.pdf [file bjc2016280x4.pdf]

**Supplementary Table S2** Clinical data for tumours in this study

| Tumour no | Tumour type <sup>1</sup> | Tumour size <sup>2</sup> | Grade <sup>3</sup> | Site <sup>4</sup> | Location <sup>5</sup> | Specific location | Stage <sup>6</sup> | Tumour subgroup <sup>7</sup> |
|-----------|--------------------------|--------------------------|--------------------|-------------------|-----------------------|-------------------|--------------------|------------------------------|
| t704      | LR                       | 1                        | 3                  | b                 | e                     | left shoulder     | IV                 | II                           |
| t158      | P                        | 2                        | 2                  | b                 | r                     | retroperitoneal   | III                | I                            |
| t33107    | LR                       | 2                        | 3                  | b                 | r                     | small intestine   | III                | II                           |
| t6858     | P                        | 2                        | 3                  | b                 | e                     | hamstring         | III                | II                           |
| t7008     | P                        | 2                        | 3                  | b                 | r                     | abdomen/mesentery | IV                 | I                            |
| t4380     | P                        | 2                        | 3                  | b                 | r                     | intestine         | III                | I                            |
| t1928     | P                        | 2                        | 2                  | b                 | e                     | mid right leg     | III                | I                            |
| t53107    | P                        | 2                        | 2                  | b                 | r                     | retroperitoneal   | III                | I                            |
| t9995     | P                        | 2                        | 2                  | a                 | r                     | chest wall        | IIB                | II                           |
| t16       | P                        | 2                        | 2                  | b                 | r                     | abdomen/mesentery | IV                 | I                            |
| t8749     | P                        | 2                        | 3                  | b                 | e                     | left thigh        | III                | II                           |
| t2592     | P                        | 2                        | 3                  | a                 | e                     | left buttock      | IIB                | II                           |
| t9652     | P                        | 2                        | 3                  | b                 | e                     | left thigh        | IV                 | II                           |
| t3779     | MET                      | 2                        | 2                  | m                 | e                     | left buttock      | IV                 | I                            |
| t278      | P                        | 2                        | nk <sup>8</sup>    | nk                | e                     | left calf         | IIB                | II?                          |
| t2868     | P                        | 1                        | 3                  | nk                | e                     | left arm          | IIA                | II                           |
| t9689     | LR                       | 1                        | 3                  | b                 | e                     | thigh             | IIA                | II                           |
| t3232     | nk                       | nk                       | nk                 | nk                | nk                    | nk                | nk                 | II                           |
| t1643     | P                        | 2                        | 3                  | nk                | r                     | left pelvis       | III                | II                           |
| t9118     | P                        | 1                        | 1                  | a                 | e                     | right triceps     | IA                 | I                            |

<sup>1</sup> P, Primary tumour; LR, Local recurrence; MET, Metastasis.

<sup>2</sup> 1, 5 cm or less in greatest dimension; 2, more than 5 cm in greatest dimension.

<sup>3</sup> Grade -1, 2 or 3 as in AJCC staging system.

<sup>4</sup> Tumour is superficial(a) or deep (b) as defined in the AJCC staging system.

<sup>5</sup> e, extremity; r, non-extremity (thoracic/abdominal/retroperitoneal sites).

<sup>6</sup> Stage (I to IV) as in AJCC staging system.

<sup>7</sup> Tumour subgroup: I, group I; II, group II.

<sup>8</sup> nk, Not known.
